# Supplementary material for: To what extent does sex, age and BMI impact medical and pharmacy costs? A retrospective cohort study involving employees in a large school district in the USA
Source: PubMed Central journal article supplement — BMJ Open. 2019 May 28;9(5):e024078. doi: 10.1136/bmjopen-2018-024078 (PMC6549653; doi:10.1136/bmjopen-2018-024078), 2019-05-28
Supplement: bmjopen-2018-024078.draft_revisions.pdf [file bmjopen-2018-024078.draft_revisions.pdf]

# BMJ Open

BMJ Open is committed to open peer review. As part of this commitment we make the peer review history of every article we publish publicly available.

When an article is published we post the peer reviewers' comments and the authors' responses online. We also post the versions of the paper that were used during peer review. These are the versions that the peer review comments apply to.

The versions of the paper that follow are the versions that were submitted during the peer review process. They are not the versions of record or the final published versions. They should not be cited or distributed as the published version of this manuscript.

BMJ Open is an open access journal and the full, final, typeset and author-corrected version of record of the manuscript is available on our site with no access controls, subscription charges or pay-per-view fees (<http://bmjopen.bmj.com>).

If you have any questions on BMJ Open's open peer review process please email [info.bmjopen@bmj.com](mailto:info.bmjopen@bmj.com)

# BMJ Open

## Prescription Medication Use According to Body Weight Classification for a Large Employer in the United States

|                               |                                                                                                                |
|-------------------------------|----------------------------------------------------------------------------------------------------------------|
| Journal:                      | <i>BMJ Open</i>                                                                                                |
| Manuscript ID                 | bmjopen-2018-024078                                                                                            |
| Article Type:                 | Research                                                                                                       |
| Date Submitted by the Author: | 11-May-2018                                                                                                    |
| Complete List of Authors:     | Merrill, Ray; Brigham Young University, Public Health<br>Fowers, Rylan; Brigham Young University               |
| Keywords:                     | health risks, screening, prescription medication, health risk appraisal, body mass index, pharmaceutical costs |
|                               |                                                                                                                |

SCHOLARONE™  
Manuscripts

view only

1  
2  
3  
4  
5  
6  
7  
8  
9  
10  
11  
12  
13  
14  
15 Prescription Medication Use According to Body Weight Classification for a Large Employer in  
16  
17 the United States  
18

19  
20 Ray M. Merrill, PhD, MPH, Rylan P. Fowers, BS  
21

22  
23 Department of Public Health, College of Life Sciences, Brigham Young University  
24  
25  
26  
27  
28  
29  
30  
31

32 Corresponding Author:  
33

34 Ray M. Merrill  
35

36 Department of Public Health  
37

38 2063 Life Sciences Building  
39

40 Provo, Utah 84602  
41

42 Email: Ray\_Merrill@byu.edu  
43

44 Telephone: 801-422-9788  
45

46 Fax: 801-422-9363  
47  
48  
49

50 Keywords: body mass index, obesity, prevention, pharmaceuticals, screening.  
51

52 Word count: 2892  
53  
54  
55  
56  
57  
58  
59  
60

**Objectives** To identify the extent that body mass index is associated with the frequency and cost of 32 selected prescribed medications.

**Methods** Retrospective analysis of prescription medication use among 2531 workers employed all four academic years for a large employer in the United States, 2011-2014. Pharmaceutical and other data were available on each employee.

**Results** Those completing wellness screening were more likely women and younger. They were also significantly more likely to file a pharmaceutical claim each year. Higher body weight was significantly associated with a greater number of prescription claims for 11 of 32 (overweight vs. normal weight) and 21 of 32 (obese vs. normal weight) medications. The strongest positive association between body weight and prescription medications was for diabetes, high cholesterol, high blood pressure, and edema. Higher body weight was associated with less prescription medication for birth control, herpes, and osteoporosis. Pharmaceutical costs tend to increase with weight. For example, annual total cost for obese compared with normal weight individuals was significantly higher for acid reflux, anticonvulsants, asthma, depression, diabetes, edema, high blood pressure, muscle spasms, nausea/vomiting, opioids, statins, and thyroid, but significantly lower for birth control, herpes, and osteoporosis.

**Conclusions** This study shows an association between BMI and pharmaceutical costs for a large employer.

#### Strengths and limitations of this study

- Research has shown that obesity increases the use and cost for medications related to the cardiovascular system, gastrointestinal system, respiratory system, central nervous system, endocrine system, and more. The current study assessed the association between body mass index, primarily obesity, and several types of prescription

1  
2  
3 medication, more than previously considered.

- 4  
5  
6 • Some associations previously observed were confirmed, but a few were not found to be  
7  
8 significant in our study. Some new associations were identified, which were not  
9  
10 previously considered, including three in which obesity was associated with lower use  
11  
12 and cost of medication.  
13  
14  
15 • The study design did not allow us to determine whether heavier weight led to  
16  
17 medication use or medication use led to greater weight.  
18  
19  
20 • The study population and patterns of prescription drug use may limit generalization of  
21  
22 the results.  
23  
24

## 25 26 **Introduction**

27  
28 Many companies offer wellness screening programs such as biometric screenings and health risk  
29  
30 assessments (questionnaires that ask about lifestyle, physical, and psychological health) to their  
31  
32 employees. The 2016 Employer Health Benefits Survey found that among large firms (200 or  
33  
34 more employees) in the United States, 59% offered health risk assessment (of which 32% had an  
35  
36 incentive component) and 53% offered biometric screening (of which 31% included an incentive  
37  
38 component).<sup>1</sup> These programs are intended to promote a greater sense of personal responsibility  
39  
40 for lifestyle choices, identify the need for health behavior change, reduce future health problems,  
41  
42 encourage patient management of existing health problems, decrease worker absenteeism, and  
43  
44 improve job satisfaction and worker productivity.<sup>2-7</sup>  
45  
46  
47  
48

49  
50 Pharmaceuticals are often useful for preventing and managing health problems. For  
51  
52 example, antihypertensive medication, or statins, are useful in preventing cardiovascular  
53  
54 disease;<sup>8-10</sup> multivitamins or folic acid for preventing congenital abnormalities;<sup>11</sup> aspirin and  
55  
56  
57  
58  
59  
60

1  
2  
3 non-steroidal anti-inflammatory for preventing colorectal cancer;<sup>12</sup> bronchodilators, steroids,  
4 and anti-inflammatories for managing asthma;<sup>13</sup> and nonsteroidal anti-Inflammatory drugs,  
5 steroids, analgesics, and immunosuppressive drugs for managing arthritis.<sup>14</sup> Consequently,  
6  
7 wellness screening may actually increase use of prescription medication.<sup>15</sup> In addition to the  
8  
9 benefits of managing existing health problems, longer-term pharmaceutical costs associated with  
10  
11 more serious health problems may be avoided.  
12  
13  
14  
15

16  
17 Although obesity is associated with increased risk for various chronic health conditions  
18 and poorer health-related quality of life,<sup>16,17</sup> only in the last 15 years or so has its impact on  
19  
20 healthcare expenditures been assessed.<sup>18</sup> Further, only a small number of studies have explored  
21  
22 the association between body weight and prescription drug use. A study conducted in England  
23  
24 found that overweight and obese individuals were more likely to receive medication for the  
25  
26 cardiovascular system; gastrointestinal system; respiratory system; central nervous system;  
27  
28 endocrine system; gynecology/urinary disorders; musculoskeletal and joint disorders; infections;  
29  
30 eye, ear and oropharynx problems; and skin disorders.<sup>19</sup> A study in Sweden showed that use and  
31  
32 cost of medication in general are significantly greater in obese individuals.<sup>20</sup> A study in the  
33  
34 United States found that obesity was responsible for \$7 billion in Medicare prescription drug  
35  
36 costs in 2006.<sup>21</sup> Another study conducted in the United States identified increased medication use  
37  
38 during 1988 through 2012, with the increase most prominent among obese individuals.<sup>22</sup> A large  
39  
40 cross-sectional study of 9789 adults in the National Health and Nutrition Examination Survey  
41  
42 (NHANES) found that obese individuals utilize several prescription drugs (e.g., hypertension,  
43  
44 lipid-lowering, and diabetes medications) more frequently than normal weight individuals.<sup>23</sup>  
45  
46  
47  
48  
49 Another study based on NHANES data found that while medication use increased over time for  
50  
51 obese compared with normal weight individuals ages 40 years and older, the increase was only  
52  
53  
54  
55  
56  
57  
58  
59  
60

1  
2  
3 marginal for those aged 25-39 years.<sup>24</sup> One study found that obese individuals used more  
4  
5 analgesic, asthma, cardiovascular, diabetes, intranasal allergic rhinitis, thyroid, and ulcer  
6  
7 medications.<sup>25</sup>  
8  
9

10 The purpose of this study is to identify the extent that body mass index is associated with  
11  
12 the frequency and total cost of 32 more commonly prescribed medications among employees.  
13  
14 These employees participated in wellness screening, which provided information about body  
15  
16 mass. Although studies have previously looked at the association between body mass index  
17  
18 (BMI) and prescription medications, we evaluate some drugs that have not been previously  
19  
20 considered, and the breadth of drugs covered is greater than in previous studies.  
21  
22  
23  
24  
25

## 26 **Methods**

27  
28 Analyses are based on employees of a large school district in the western United States involving  
29  
30 6 high schools, 8 junior high schools, and 31 elementary schools. The study involved the  
31  
32 academic years 2010-11, 2011-12, 2012-13, and 2013-14. Employees were offered wellness  
33  
34 screenings (personal health risk assessment and biometric evaluation) each fall. Pharmaceutical  
35  
36 claims data was also obtained for the employees in each academic year. Wellness screening and  
37  
38 pharmaceutical claims data were combined with an eligibility file of employees and assessed  
39  
40 within each academic year. The eligibility file contained information on current employment,  
41  
42 age, sex, and year.  
43  
44  
45

### 46 **Wellness Screening**

47  
48 Wellness screening consisted of a personal health risk assessment (HRA) and biometric  
49  
50 evaluation. All employees were offered wellness screening. Although participation was  
51  
52 voluntary, it was promoted through incentives. The HRA involved 36 questions. For the current  
53  
54  
55  
56  
57  
58  
59  
60

1  
2  
3 study, we only used information on self-rated health status, exercise, sleep, stress, fruit  
4  
5 consumption, vegetable consumption, and grain consumption. Self-rated health was based on the  
6  
7 question: “In general, how would you rate your overall health?” Participants responded on a  
8  
9 scale from 1 (low) to 10 (high). Exercise was based on the question: “During the past week, how  
10  
11 many days per week do you usually exercise?” Sleep was based on the question: “During the  
12  
13 past week, how many days did you get enough sleep so that you awoke feeling rested and  
14  
15 refreshed?” Stress was based on the question: “During the past 3 months, how often has your  
16  
17 normal daily routine been disrupted by stressful events? Fruit, vegetables, and grain  
18  
19 consumption, were determined as the number of servings per day.  
20  
21  
22  
23

24 Biometric screenings included measurements of body mass, blood pressure, cholesterol,  
25  
26 and glucose. They were provided at no cost to the employees and were made available to  
27  
28 employees on location or with a personal physician. A health nurse or physician assisted the  
29  
30 employee in interpreting their biometric measures. The current study only considers BMI.  
31  
32 Weight classifications are determined as follows: normal weight (BMI < 25), overweight (BMI  
33  
34 25-29), and obese (BMI 30+).  
35  
36  
37

### 38 Pharmaceutical Claims Data

39  
40  
41 Pharmaceutical costs were adjusted to account for medical-cost inflation. Tom’s Medical-  
42  
43 Cost Inflation Calculator was used for this purpose. Annual average dollar (\$) pharmaceutical  
44  
45 cost and number of claims per eligible employee were obtained. In this study, cost represents the  
46  
47 amount paid by the company as well as copays by the employee.  
48  
49  
50  
51  
52  
53  
54

### 55 Statistical Techniques



Counts, means, standard deviations, standard errors, and percentages were used to describe characteristics of the study population. Regression and Pearson's Correlation Coefficients were used to evaluate the association between selected variables. Because the use of pharmaceuticals tends to be greater in older employees and among women,<sup>26,27</sup> we will adjust for these variables, along with year. Risk ratios were used to assess medication use for selected drugs according to weight classification. These ratios were adjusted using the Mantel-Haenszel method. Statistical significance was assessed using the p value and 95% confidence limits. Two-sided tests of significance were based on the 0.05 level against a null hypothesis of no association. Data was evaluated using the statistical software package PC-SAS (version 9.4; SAS Institute, Inc., 2014)

## Results

In 2010-11, there were 3023 eligible employees, of which 2531 (83.72%) remained employed through the academic year 2013-14. The percentage of females was about the same for those remaining employed versus not, at about 73.2%. Mean age was 6.3 (SE = 0.2,  $p < 0.0001$ ) years older for those continuously employed, averaging about 48.4 (SD = 10.4, range 18-78). The results of this study are based on those continuously employed over the four academic years.

Most employees participated in annual wellness screening (84.1% in 2010-11, 84.4% in 2011-12, 87.6% in 2012-13, and 80.7% in 2013-14). Women were 1.04 (95% CI 1.02- 1.06) times more likely than men to complete annual wellness screenings, after adjusting for age and year. Participants in wellness screening were significantly younger, on average (47.7 vs. 49.8,  $p < 0.0001$ ), after adjusting for sex and year. Those participating in wellness screening filed more

1  
2  
3 pharmaceutical claims annually ( $M = 10.6$  vs.  $9.6$ ,  $p = 0.0064$ ), but there was no significant  
4  
5 difference in mean annual total costs, after adjusting for age, sex, and year.  
6  
7

8 Participants in wellness screenings were asked how they would rate their overall health.  
9  
10 This variable was regressed on BMI, exercise, fruit, vegetables, grains, stress, sleep, age, sex,  
11  
12 and year. The variability in self-rated overall health was most strongly associated with BMI  
13  
14 ( $13.8\%$ ,  $p < 0.0001$ ), followed by days exercised per week ( $8.6\%$ ,  $p < 0.0001$ ), and days of  
15  
16 restful sleep per week ( $3.6\%$ ,  $p < 0.0001$ ). Body mass was significantly correlated with exercise  
17  
18 ( $r = -0.21$ ,  $p < 0.0001$ ), fruit ( $r = -0.04$ ,  $p = 0.0146$ ), vegetables ( $r = -0.05$ ,  $p = 0.0013$ ), grains ( $r =$   
19  
20  $-0.05$ ,  $p = 0.0030$ ), stress ( $r = 0.05$ ,  $p = 0.0014$ ), and sleep ( $-0.06$ ,  $p < 0.0001$ ), after adjusting for  
21  
22 age, sex, and year.  
23  
24  
25  
26

27 The mean health rating was 8.4 for normal weight (BMI 18-24), 7.9 for overweight (BMI  
28  
29 25-29), and 7.1 for obese (BMI 30+), after adjusting for age, sex, and year. The percentage of  
30  
31 men and women in each of these BMI categories is presented in Table 1. Frequency and total  
32  
33 cost of pharmaceuticals increased with increasing weight for men and women. The distribution  
34  
35 of mean frequency and particularly total cost values are highly skewed, as indicated by their  
36  
37 comparison with the median scores.  
38  
39  
40  
41

42 The association between weight and annual frequency and total cost of pharmaceutical  
43  
44 claims is shown in Table 2. Overweight compared with normal weight participants were 1.10  
45  
46 times more likely to file 15 or more pharmaceutical claims per year versus no claims. Obese  
47  
48 compared with normal weight participants were 1.27 times more likely to file 15 or more  
49  
50 pharmaceutical claims per year versus no claims. Overweight compared with normal weight  
51  
52 participants were 1.08 times more likely to have annual pharmaceutical costs of \$1000 or more  
53  
54  
55  
56  
57  
58  
59  
60

1  
2  
3 per year than no costs. Obese compared with normal weight participants were 1.20 times more  
4 likely to have annual pharmaceutical costs of \$1000 or more per year than no costs.  
5  
6  
7

8 Overweight and obese individuals are significantly more likely to file a claim each year  
9 for many types of medication (Table 3). Overweight individuals are significantly more likely  
10 than normal weight individuals to file a claim for 11 of the 32 medications considered. Obese  
11 individuals are more likely than normal weight individuals to file a claim for 21 of the selected  
12 medications. The strongest positive association between weight and prescription medications is  
13 for diabetes, high cholesterol, high blood pressure, and edema. Overweight individuals were less  
14 likely to receive medication for birth control or osteoporosis. Higher body weight lowers the  
15 need for medications associated birth control, herpes, and osteoporosis. For all prescription  
16 medications, obese are 1.05 (95% CI 1.02-1.07) times more likely than normal weight  
17 individuals to file a claim (population attributable fraction 3.77), adjusting for age, sex, and year.  
18  
19  
20  
21  
22  
23  
24  
25  
26  
27  
28  
29  
30  
31

32 We also report the population attributable fraction (population attributable risk percent)  
33 in the table. For example, this statistic says that 3.78% of diabetes medication is attributed to  
34 being overweight and 6.62% of diabetes medication is attributed with being obese. Where the  
35 risk ratio is less than 1, we estimated the preventive fraction. For example, 15% more birth  
36 control medication would have been prescribed in the absence of obesity. However, these  
37 statistics imply a cause-and-effect association between exposure and disease.  
38  
39  
40  
41  
42  
43  
44  
45

46 Annual total cost for the selected medications according to weight classification is shown  
47 in Table 4. Pharmaceutical cost tends to increase with weight. Overall, obese individuals have  
48 significantly greater annual total cost than normal weight individuals. Annual total cost for obese  
49 individuals is significantly greater than normal weight individuals for acid reflux,  
50  
51  
52  
53  
54  
55  
56  
57  
58  
59  
60 anticonvulsants, asthma, depression, diabetes, edema, high blood pressure, muscle spasms,

1  
2  
3 nausea/vomiting, opioids, statins, and thyroid. Annual total cost for obese individuals is  
4 significantly greater than overweight individuals for anticonvulsants, diabetes, high blood  
5 pressure, inflammation, muscle spasms, and thyroid. On the other hand, annual total cost for  
6 obese individuals is significantly lower than normal weight individuals for birth control, herpes,  
7 and osteoporosis. Annual total cost for obese individuals is significantly lower than overweight  
8 individuals for herpes. The average annual total cost for all prescription medications was 691.4  
9 for normal weight, 843.2 for overweight, and 910.9 for obese, adjusting for age, sex and year.  
10  
11 The difference between normal weight and obese was significant ( $p = 0.0208$ ).  
12  
13  
14  
15  
16  
17  
18  
19  
20  
21  
22  
23

## 24 Discussion

25  
26 The current study identified the degree to which increasing body weight is associated  
27 with frequency and cost of 32 types of medication. We found positive associations between body  
28 weight and higher use of medications for treating acid reflux, arthritis, asthma, bacterial  
29 infections, cardiovascular disease, blood coagulation, colds, flu, allergies, depression, diabetes,  
30 edema, high blood pressure, inflammation, muscle spasms, pain, stomach acid, thyroid, and  
31 ulcers. Other studies have identified a similar association between body weight and some of the  
32 medications used to treat these conditions.<sup>19, 22, 23, 25</sup> Obese individuals were also more likely to  
33 be prescribed vitamins and minerals. We did not find an association between body weight and  
34 increased use of medication for the bowel/rectum, skin, or urinary tract, which was counter to  
35 that found in other studies.<sup>19, 28-30</sup> We also assessed but did not find a significant association for  
36 medications used to treat anxiety, fungus, seizures, or teeth and gums, although the number  
37 receiving medication for teeth and gums were small. Finally, we assessed the association  
38 between body weight and medications used to treat birth control, herpes, and osteoporosis, for  
39  
40  
41  
42  
43  
44  
45  
46  
47  
48  
49  
50  
51  
52  
53  
54  
55  
56  
57  
58  
59  
60

1  
2  
3 which significant negative associations were found. We are not aware of other studies that have  
4  
5 looked at the association between body weight and medications used for coagulation of blood,  
6  
7 colds, flu, depression, edema, birth control, herpes, or osteoporosis.  
8  
9

10 For those medications in which there was a significant positive or negative association  
11  
12 with body weight, some showed no significant association with annual total cost. This was the  
13  
14 case for bacterial infections, coagulation of blood, eye infection, and ulcers. This is likely due to  
15  
16 the high variability in the annual total cost data. For bacterial infections, the coefficient of  
17  
18 variation is 6.1 for normal weight, 14.4 for overweight, and 4.3 for obese; for coagulation of  
19  
20 blood the coefficient of variation is 29.7 for normal weight, 37.4 for overweight, and 11.6 for  
21  
22 obese; for eye infection, the coefficient of variation is 6.2 for normal weight, 4.8 for overweight,  
23  
24 and 5.1 for obese; and for ulcers, the coefficient of variation is 14.6 for normal weight, 20.6 for  
25  
26 overweight, and 10.8 for obese. In addition, the increased use of medication among those with  
27  
28 bacterial or eye infections was relatively small.  
29  
30  
31  
32  
33

34 Increased use of medication for acid reflux or stomach acid among obese individuals is  
35  
36 consistent with previous research that showed greater reflux disease hospitalization rates with  
37  
38 higher BMI.<sup>31, 32</sup> Another study found that higher BMI is associated with increased  
39  
40 gastroesophageal reflux in both normal and overweight individuals.<sup>33</sup> Greater weight can add  
41  
42 pressure to the stomach and diaphragm, thereby resulting in reflux. Further, increased use of  
43  
44 medication for nausea/vomiting among obese individuals is consistent with other research  
45  
46 associating increasing BMI with nausea/vomiting.<sup>34</sup>  
47  
48  
49

50 The positive association between being overweight or obese with increased use of  
51  
52 medication for ulcers is consistent with other research, particularly peptic (gastric and duodenal)  
53  
54 ulcers.<sup>35, 36</sup> The mechanism to explain the association between obesity and peptic ulcer disease  
55  
56  
57  
58  
59  
60

1  
2  
3 remains unclear. Obesity is also associated with *Helicobacter pylori*, which has been linked with  
4  
5 gastric ulcers.<sup>37</sup>  
6  
7

8 Overweight and obese individuals had a higher use of medication for inflammation.  
9  
10 Overweight and especially obese individuals are at greater risk for chronic inflammation, which  
11  
12 can compromise the immune system. As such, overweight and obese individuals are at greater  
13  
14 risk for infections.<sup>38-40</sup> This is consistent with our results that show increased use of antibiotics  
15  
16 and medication for eye infections among obese individuals. However, research has shown that  
17  
18 antibiotics can also weaken the immune system,<sup>41</sup> as well as lead to obesity.<sup>42</sup> Some chronic  
19  
20 inflammatory diseases known to be associated with obesity in which we found a positive  
21  
22 association between obesity and medication included influenza,<sup>43, 44</sup> heart disease,<sup>45</sup> diabetes,<sup>46</sup>  
23  
24 allergies,<sup>47-50</sup> asthma,<sup>51</sup> edema,<sup>52-54</sup> and arthritis.<sup>55-58</sup> A compromised immune system may also  
25  
26 trigger autoimmune diseases, including rheumatoid arthritis and thyroid disease,<sup>59</sup> as indicated in  
27  
28 the current study.  
29  
30  
31  
32  
33

34 Overweight and obese individuals were more likely to receive cold, flu, or allergy  
35  
36 medication. Obesity is associated with impaired immune response to influenza vaccination in  
37  
38 humans.<sup>60</sup> Because vaccination is less successful for obese individuals, a greater level of  
39  
40 medication may be sought for treating colds, flu, and allergies.  
41  
42  
43

44 Overweight and obese individuals received higher levels of pain medication. Research  
45  
46 indicates that the nature of the relationship between higher BMI and pain is likely indirect.<sup>61</sup> For  
47  
48 example, greater body weight is associated with osteoarthritis, which, in turn, leads to pain.<sup>62</sup>  
49  
50 Being overweight or obese may result in greater risk for back pain, joint pain, and muscle  
51  
52 spasms.<sup>63</sup> One study also found that obese individuals were more sensitive than those of normal  
53  
54 weight to pressure pain.<sup>64</sup>  
55  
56  
57  
58  
59  
60

1  
2  
3 We found that overweight and obese individuals were more likely to receive depression  
4 medication than those of normal weight. This is consistent with previous research.<sup>65-68</sup> The age-  
5 adjusted percentage of adults in the United States ages 20 years and older who were obese was  
6 43.2 for those with depression compared with 33.0 for those with no depression.<sup>69</sup> It may be that  
7 higher use of prescription medication for depression among overweight and obese individuals is  
8 because these people are more likely to experience other conditions related to depression, such as  
9 heart disease and diabetes.<sup>70-72</sup>

10  
11  
12  
13  
14  
15  
16  
17  
18  
19  
20 Obese individuals filed more claims for vitamins and minerals. Previous research has  
21 associated low vitamin B12 with being overweight or obesity.<sup>73</sup> Vitamin B assists the body in  
22 metabolizing fats, carbohydrates, and protein, as well as helps with appetite control. Deficiency  
23 in vitamin B can cause anemia or nervous conditions. Another study found that the prevalence of  
24 vitamin D deficiency was 35% greater in obese individuals.<sup>74</sup> Vitamin D assists the body to  
25 absorb calcium and promote bone growth, whereas deficiency causes soft bones and depression.  
26  
27  
28  
29  
30  
31  
32  
33  
34  
35  
36  
37  
38  
39  
40  
41  
42  
43  
44  
45  
46  
47  
48  
49  
50  
51  
52  
53  
54  
55  
56  
57  
58  
59  
60  
Among the vitamin or mineral claims filed in the current study, 8.0% involved vitamin B and  
57.3% involved vitamin D.

## References

1. 2016 Employer Health Benefits Survey. kff.org. <http://www.kff.org/health-costs/report/2016-employer-health-benefits-survey/>. Published September 14, 2016. Accessed February 21, 2018.
2. Chen L, Hannon PA, Laing SS, Kohn MJ, Clark K, Pritchard S, Harris JR. Perceived workplace health support is associated with employee productivity. *Am J Health Promot.* 2015;29(3):139-146.

- 1  
2  
3 3. Centers for Disease Control and Prevention. [cdc.gov](http://www.cdc.gov).  
4  
5 <http://www.cdc.gov/sustainability/worksitewellness/> Worksite wellness. Updated December  
6  
7 9, 2014. Accessed March 18, 2018.  
8  
9
- 10 4. Michaels CN, Greene AM. Worksite wellness: increasing adoption of workplace health  
11  
12 promotion programs. *Health Promot Pract*. 2013;14(4):473-479.  
13
- 14 5. Witt LB, Olsen D, Ablah E. Motivating factors for small and mid-sized businesses to  
15  
16 implement worksite health promotion. *Health Promot Pract*. 2013;14(6), 876-884.  
17  
18
- 19 6. Niessen MA, Kraaijenhagen RA, Dijkgraaf MG, van Pelt D, van Kalken CK, Peek N. Impact  
20  
21 of a Web-based worksite health promotion program on absenteeism. *J Occup Environ Med*.  
22  
23 2012;54(4):404-408.  
24  
25
- 26 7. Kaspin LC, Gorman KM, Miller RM. Systematic review of employer-sponsored wellness  
27  
28 strategies and their economic and health-related outcomes. *Popul Health Manag*. 2013;16(1):  
29  
30 14-21.  
31  
32
- 33 8. Karmali KN, Lloyd-Jones DM, Berendsen M, et al. Drugs for primary prevention of  
34  
35 atherosclerotic cardiovascular disease: an overview of systematic reviews. *JAMA Cardiol*.  
36  
37 2016;1(3):341-349.  
38  
39
- 40 9. Fretheim A, Odgaard-Jensen, Brørs O, Madsen S, et al. Comparative effectiveness of  
41  
42 antihypertensive medication for primary prevention of cardiovascular disease: systematic  
43  
44 review and multiple treatments meta-analysis. *BMC Med*. 2012;10:33.  
45  
46
- 47 10. Taylor F, Huffman MD, Macedo A, et al. Statins for the primary prevention of  
48  
49 cardiovascular disease. *Cochrane*. 2013. [http://www.cochrane.org/CD004816/VASC\\_statins-](http://www.cochrane.org/CD004816/VASC_statins-primary-prevention-cardiovascular-disease)  
50  
51 [primary-prevention-cardiovascular-disease](http://www.cochrane.org/CD004816/VASC_statins-primary-prevention-cardiovascular-disease). Accessed February 21, 2018.  
52  
53
- 54 11. Czeizel AE. Birth defects are preventable. *Int J Med Sci*. 2005;2(3):91-92.  
55  
56  
57  
58  
59  
60



12. Chan AT, Giovannucci EL. Primary prevention of colorectal cancer. *Gastroenterology*. 2010;138(6):2029-2043.
13. Asthma. Mayo Clinic. <https://www.mayoclinic.org/diseases-conditions/asthma/diagnosis-treatment/drc-20369660>. Published March 9, 2018. Accessed February 24, 2018.
14. Arthritis. Mayo Clinic. <https://www.mayoclinic.org/diseases-conditions/arthritis/diagnosis-treatment/drc-20350777>. Published March 7, 2018. Accessed February 24, 2018.
15. Preventive Medicine Reports Paper
16. Thompson D, Edelsberg J, Colditz GA, Bird AP, Oster G. Lifetime health and economic consequences of obesity. *Arch Intern Med*. 1999;119(18):2177-2183.
17. Pi-Sunyer X. The medical risks of obesity. *Postgrad Med*. 2009;121(6):21-33.
18. Arterburn DE, Maciejewski ML, Tsevat J. Impact of morbid obesity on medical expenditures in adults. *Int J Obes*. 2005;29(3):334-9.
19. Kinge JM, Morris S. Association between obesity and prescribed medication use in England. *Econ Hum Biol*. 2014;15:47-55.
20. Narbro K, Agren G, Jonsson E, et al. Pharmaceutical costs in obese individuals: comparison with a randomly selected population sample and long-term changes after conventional and surgical treatment: the SOS intervention study. *Arch Intern Med*. 2002;162(18):2061-2069.
21. Finkelstein EA, Trogon JG, Cohen JW, Dietz W. Annual medical spending attributable to obesity: payer-and service-specific estimates. *Health Aff*. 2009;28(5):w822-31.
22. Randhawa AK, Parikh JS, Kuk JL. Trends in medication use by body mass index and age between 1988 and 2012 in the United States. *PLoS One*. 2017 Sep 20;12(9):e0184089.
23. Kit BK, Ogden CL, Flegal KM. Prescription medication use among normal weight, overweight, and obese adults, United States, 2005-2008. *Ann Epidemiol*. 2012;22(2):112-9.

24. Jarrett B, Bloch GJ, Bennett D, Bleazard B, Hedges D. The influence of body mass index, age and gender on current illness: a cross-sectional study. *Int J Obes*. 2010;34(3):429-36.
25. Raebel MA, Malone DC, Conner DA, Xu S, Porter JA, Lanty FA. Health services use and health care costs of obese and nonobese individuals. *Arch Intern Med*. 2004;164(19):2135-40.
26. Metge C, Black C, Peterson S, Kozyrskyi AL. The population's use of pharmaceuticals. *Med Care*. 1999;37(6 Suppl):JS42-JS59.
27. Bertakis K, Azari R, Helms L, Callahan E, Robbins J. Gender differences in the utilization of health care services. *J Fam Pract*. 2000;49(2):147-152.
28. Ma Y, Yang Y, Wang F, et al. Obesity and risk of colorectal cancer: a systematic review of prospective studies. *PLoS One* 2013;8(1):e53916.
29. Brown J, Wimpenny P, Maughan H. Skin problems in people with obesity. *Nurs Stand*. 2004;18(35):38-42.
30. Semins MJ, Shore AD, Makary MA, Weiner J, Matlaga BR. The impact of obesity on urinary tract infection risk. *Urology*. 2012;79(2):266-9.
31. Ruhl CE, Everhart JE. Overweight, but not high dietary fat intake, increases risk of gastroesophageal reflux disease hospitalization: the NHANES I Epidemiologic Followup Study. First National Health and Nutrition Examination Survey. *Ann Epidemiol*. 1999;9(7):424-35.
32. Anggiansah R, Sweis R, Anggiansah A, Wong T, Cooper D, Fox M. The effects of obesity on oesophageal function, acid exposure and the symptoms of gastro-oesophageal reflux disease. *Alim Pharmacol Ther*. 2013;37(5):555-563.

- 1  
2  
3 33. Jacobson BC, Somers SC, Fuchs CS, Kelly CP, Camargo CA Jr. Association between body  
4 mass index and gastroesophageal reflux symptoms in both normal weight and overweight  
5 women. *N Engl J Med*. 2006;354(22):2340-2348.  
6  
7  
8  
9  
10 34. Talley NJ, Howell S, Poulton R. Obesity and chronic gastrointestinal tract symptoms in  
11 young adults: a birth cohort study. *Am J Gastroenterol* 2004;99(9):1807-1814.  
12  
13  
14 35. Boylan MR, Khalili H, Huang ES, Chan AT. Measures of adiposity are associated with  
15 increased risk of peptic ulcer. *Clin Gastroenterol Hepatol*. 2014 Oct;12(10):1688-1694.  
16  
17  
18  
19 36. Kim J, Kim KH, Lee BJ. Association of peptic ulcer disease with obesity, nutritional  
20 components, and blood parameters in the Korean population. *PLoS One*. 2017;12(8):  
21 e0183777.  
22  
23  
24  
25  
26 37. Xu M, Liu L, Yuan B, Yin J, Lu Q. Association of obesity with *Helicobacter pylori* infection:  
27 A retrospective study. *World J Gastroenterol* 2017;23(15):2750-2756.  
28  
29  
30  
31 38. Falagas ME, Kompoti M. Obesity and infection. *Lancet Infect Dis* 2006;6(7):438-46.  
32  
33  
34 39. Huttunen R, Syrjanen J. Obesity and the risk and outcome of infection. *Int J Obes*.  
35 2013;37:333-340.  
36  
37  
38 40. Lübbecke A, Zingg M, Hoffmeyer P, et al. Body mass and weight thresholds for increased  
39 prosthetic joint infection rates after primary total joint arthroplasty. *Acta Orthopaedica*.  
40 2016;87(2):132-138  
41  
42  
43  
44 41. Yang JH, Bhargava P, McCloskey D, Mao N, Palsson BO, Collins JJ. Antibiotic-induced  
45 changes to the host metabolic environment inhibit drug efficacy and alter immune function.  
46 *Cell Host & Microbe*. 2017;22(6):757-765.  
47  
48  
49  
50  
51 42. Early G. Current Evidence regarding antibiotic exposure and childhood obesity: an  
52 integrative review. *Ped Nurs*. 2017;43(4):169-174.  
53  
54  
55  
56  
57  
58  
59  
60

- 1  
2  
3 43. Bandaru P, Rajkumar H, Napanveettil G. The impact of obesity on immune response to  
4 infection and vaccine: an insight into plausible mechanisms. *Endocrinol Metab Synd*  
5 2013;2:2.  
6  
7  
8  
9  
10 44. Kwong JC, Campitelli MA, Rosella LC. Obesity and respiratory hospitalizations during  
11 influenza seasons in Ontario, Canada: a cohort study. *Clin Infect Dis*. 2011;53(5):413-421.  
12  
13  
14 45. Wang Z, Nakayama T. Inflammation, a link between obesity and cardiovascular disease.  
15 *Mediators Inflamm*. 2010;2010:535918.  
16  
17  
18  
19 46. Bastard JP, Maachi M, Lagathu C, Kim MJ, Caron M, Vidal H, Capeau J, Feve B. Recent  
20 advances in the relationship between obesity, inflammation, and insulin resistance. *Eur*  
21 *Cytokine Netw*. 2006;17(1):4-12.  
22  
23  
24  
25  
26 47. Ciprandi G, Pistorio A, Tosca M, Ferraro MR, Cirillo I. Body mass index, respiratory  
27 function and bronchial hyperactivity in allergic rhinitis and asthma. *Respir Med*  
28 2009;103(2):289-295.  
29  
30  
31  
32  
33 48. Gorgievska-Sukarovska B, Lipozencić J, Susac A. Obesity and allergic diseases. *Acta*  
34 *Dermatovenerol Croat*. 2008;16(4):231-235.  
35  
36  
37  
38 49. Shah R, Yang Y. Health and economic burden of obesity in elderly individuals with asthma  
39 in the United States. *Popul Health Manag* 2015;18(3):186-91.  
40  
41  
42  
43 50. Guo Y, Moon JY, Laurie CC, et al. Genetic Predisposition to Obesity is associated  
44 with Asthma in US Hispanics/Latinos: Results from the Hispanic Community Health  
45 Study/Study of Latinos. *Allergy*. 2018;doi: 10.1111/all.13450. [Epub ahead of print]  
46  
47  
48  
49 51. Rodriguez D. Obesity and Asthma – What’s the Connection.  
50  
51 <https://www.everydayhealth.com/asthma/obesity-connection.aspx>. Published August 28,  
52 2013. Accessed April 12, 2018.  
53  
54  
55  
56  
57  
58  
59  
60

- 1  
2  
3 52. Greene, A.K., et al. Lower-Extremity Lymphedema and Elevated Body-Mass Index. *N Engl*  
4  
5 *J Med.* 2012;366:2136-2137.  
6  
7  
8 53. Helyer, L.K., et al. Obesity is a risk factor for developing postoperative lymphedema in  
9  
10 breast cancer patients. *Breast J.* 2012;16(1):48-54.  
11  
12 54. Greene AK, Grant FD, Slavin SA, Maclellan RA. Obesity-induced lymphedema: clinical and  
13  
14 lymphoscintigraphic features. *Plast Reconstr Surg.* 2015;135(6):1715-1719.  
15  
16  
17 55. King LK, March L, Anandacoomarasamy A. Obesity & osteoarthritis. *Indian J Med Res.*  
18  
19 2013;138(2):185-193.  
20  
21  
22 56. Baodong Qin, Min Yang, Haitao Fu, et al. Body mass index and the risk of rheumatoid  
23  
24 arthritis: a systematic review and dose-response meta-analysis. *Arthritis Res Ther.*  
25  
26 2015;17(1):86.  
27  
28  
29 57. Feng J, Chen Q, Yu F, et al. Body mass index and risk of rheumatoid arthritis: a meta-  
30  
31 analysis of observational studies. *Medicine.* 2016;95(8):e2859.  
32  
33  
34 58. Albrecht K, Richter A, Callhoff J, et al. Body mass index distribution in rheumatoid arthritis:  
35  
36 a collaborative analysis from three large German rheumatoid arthritis databases. *Arthritis Res*  
37  
38 *Ther.* 2016;18:149.  
39  
40  
41 59. Rodriguez D. How Your Immune System Worsens Arthritis. *EverydayHealth.com.*  
42  
43 <https://www.everydayhealth.com/arthritis/understanding/the-immune-system.aspx>. Published  
44  
45 August 1, 2012. Accessed April 11, 2018.  
46  
47  
48 60. Sheridan PA, Paich HA, Handy J, et al. Obesity is associated with impaired immune response  
49  
50 to influenza vaccination in humans. *Int J Obes.* 2012;36(8):1072-1077.  
51  
52  
53 61. Okifuji A, Hare BD. The association between chronic pain and obesity. *J Pain Res.*  
54  
55 2015;8:399-408.  
56  
57  
58  
59  
60

- 1  
2  
3 62. Erdmann J. Osteoarthritis and Obesity. [www.arthritis.org](http://www.arthritis.org). [https://www.arthritis.org/living-](https://www.arthritis.org/living-with-arthritis/comorbidities/obesity-arthritis/osteoarthritis-and-obesity.php)  
4 with-arthritis/comorbidities/obesity-arthritis/osteoarthritis-and-obesity.php. Accessed April  
5 11, 2018.  
6  
7  
8  
9  
10 63. American Obesity Association. Health effects of obesity. AOA Fact Sheets. 2002.  
11  
12 64. Tashani OA, Asitita R, Sharp D, Johnson MI. Body mass index and distribution of body fat  
13 can influence sensory detection and pain sensitivity. *Eur J Pain* 2017;21(7):1186-1196.  
14  
15 65. Rathee N. Obesity and depression: Are they related? *Indian J Health Well*. 2017;8(12):1472-  
16 1475.  
17  
18 66. Zhao G, Ford ES, Dhingra S, Li C, Strine TW, Mokdad AH. Depression and anxiety among  
19 US adults: associations with body mass index. *Int J Obesity*. 2009;33(2):257-266.  
20  
21 67. Onyike CU, Crum RM, Lee HB, Lyketsos DG, Eaton WW. Is obesity associated with major  
22 depression? Results from the Third National Health and Nutrition Examination Survey. *Am J*  
23 *Epidemiol*. 2003;158(12):1139-1147.  
24  
25 68. Petry NM, Barry D, Pietrzak RH, Wagner JA. Overweight and obesity are associated with  
26 psychiatric disorders: results from the National Epidemiologic Survey on Alcohol and  
27 Related Conditions. *Psychosom Med*. 2008;70(3):288-297.  
28  
29 69. Pratt LA, Brody DJ. Depression and obesity in the U.S. adult household population, 2005-  
30 2010. NCHS Data Brief, No. 167, October 2014.  
31  
32 70. McElroy SL, Kotwal R, Malhotra S, Nelson EB, Keck PE, Nemeroff CB. Are mood  
33 disorders and obesity related? A review for the mental health professional. *J Clin Psychiatry*  
34 2004;65(5):634-651.  
35  
36 71. Ferraro KF, Su Y, Gretebeck RJ, Black DR, Badylak SF. Body mass index and disability in  
37 adulthood: A 20-year panel study. *Am J Public Health*. 2002;92(5):834-840.  
38  
39  
40  
41  
42  
43  
44  
45  
46  
47  
48  
49  
50  
51  
52  
53  
54  
55  
56  
57  
58  
59  
60

- 1  
2  
3 72. Katon W, Ciechanowski P. Impact of major depression on chronic medical illness. *J*  
4  
5 *Psychosom Res.* 2002;53(4):859-863.  
6  
7  
8 73. Baltaci D, Kutlucan A, Turker Y, et al. Association of vitamin B12 with obesity, overweight,  
9  
10 insulin resistance and metabolic syndrome, and body fat composition; primary care-based  
11  
12 study. *Med Glas.* 2013;10(2):203-210.  
13  
14  
15 74. Pereira-Santos M<sup>1</sup>, Costa PR, Assis AM, Santos CA, Santos DB. Obesity and vitamin D  
16  
17 deficiency: a systematic review and meta-analysis. *Obes Rev.* 2015;16(4):341-349.  
18  
19

## 20 Footnotes

21  
22  
23 Contributors: RMM conceived and designed the epidemiological study, contributed to  
24  
25 acquisition of data, analyzed and interpreted the data, and drafted the manuscript. RPF  
26  
27 interpreted the data, provided a literature review, and revised the manuscript. Both authors  
28  
29 critically revised the manuscript for important intellectual content. The manuscript has been read  
30  
31 and approved by both authors.  
32  
33

- 
- 34  
35 • Funding: The authors have not declared a specific grant for this research from any funding  
36  
37 agency in the public, commercial or not-for-profit sectors.  
38  
39
  - 40 • Competing interests: None declared.  
41  
42
  - 43 • Patient consent: Not required.  
44  
45
  - 46 • Ethics approval: Study approval was obtained from the institutional review board at Brigham  
47  
48 Young University (IRB E1 5259).  
49  
50
  - 51 • Provenance and peer review: Not commissioned; externally peer reviewed.  
52  
53
  - 54 • Data sharing statement: The data sets used and analyzed in the current study are available from  
55  
56 the corresponding author on reasonable request at: [Ray\\_Merrill@byu.edu](mailto:Ray_Merrill@byu.edu).  
57  
58

1  
2  
3  
4  
5  
6  
7  
8  
9  
10  
11  
12  
13  
14  
15  
16  
17  
18  
19  
20  
21  
22  
23  
24  
25  
26  
27  
28  
29  
30  
31  
32  
33  
34  
35  
36  
37  
38  
39  
40  
41  
42  
43  
44  
45  
46  
47  
48  
49  
50  
51  
52  
53  
54  
55  
56  
57  
58  
59  
60

For peer review only



Table 1 Mean Frequency and Total Cost of Pharmaceuticals According to Classifications of Body Mass Index and Sex in Wellness Screening Participants

| Weight                 | Men  |                |         |         |                 |         |         | Women |                |         |         |                 |         |          |
|------------------------|------|----------------|---------|---------|-----------------|---------|---------|-------|----------------|---------|---------|-----------------|---------|----------|
|                        | %    | Frequency Mean | Pr >  t | Median  | Total Cost Mean | Pr >  t | Median  | %     | Frequency Mean | Pr >  t | Median  | Total Cost Mean | Pr >  t | Median   |
| Normal weight BMI < 25 | 21.0 | 6.3            | < .0001 | 2       | 744.3           | 0.7844  | 23.3    | 44.2  | 10.5           | < .0001 | 7       | 900.0           | 0.0431  | 216.0    |
| Overweight BMI 25-29   | 42.3 | 7.9            | < .0001 | 4       | 746.5           | 0.7979  | 66.1    | 28.5  | 13.2           | 0.0003  | 8       | 1005.1          | 0.3032  | 255.7    |
| Obese BMI 30+          | 36.6 | 10.2           | 0.0000  | 5       | 813.1           | 0.0000  | 81.6    | 27.2  | 15.0           | 0.0000  | 11      | 1137.3          | 0.0000  | 320.3    |
| P value                |      |                |         | < 0.001 |                 |         | < 0.001 |       |                |         | < 0.001 |                 |         | < 0.0001 |

Means are adjusted for age and year. Differences in the median values were assessed for statistical significance using the median one-way analysis chi-square test.

Table 2. Frequency and Total Cost of Pharmaceutical Medication for Overweight and Obese Compared with Normal Weight  
Participants in Wellness Screening

| Frequency |       |                             |         |         |                        |         |         | Total Cost |       |                             |         |         |                        |         |         |
|-----------|-------|-----------------------------|---------|---------|------------------------|---------|---------|------------|-------|-----------------------------|---------|---------|------------------------|---------|---------|
|           |       | Overweight vs Normal Weight |         |         | Obese vs Normal Weight |         |         |            |       | Overweight vs Normal Weight |         |         | Obese vs Normal Weight |         |         |
| No.       | %     | Risk Ratio                  | 95% LCL | 95% UCL | Risk Ratio             | 95% LCL | 95% UCL | \$         | %     | Risk Ratio                  | 95% LCL | 95% UCL | Risk Ratio             | 95% LCL | 95% UCL |
| 0         | 21.64 | 0.00                        |         |         | 0.00                   |         |         | 0          | 21.64 | 0.00                        |         |         | 0.00                   |         |         |
| 1-4       | 20.62 | 0.96                        | 0.89    | 1.05    | 0.94                   | 0.85    | 1.02    | 1-99       | 21.33 | 0.97                        | 0.89    | 1.05    | 0.99                   | 0.91    | 1.07    |
| 5-9       | 17.14 | 0.92                        | 0.84    | 1.01    | 0.94                   | 0.85    | 1.03    | 100-499    | 25.31 | 0.99                        | 0.93    | 1.07    | 1.10                   | 1.03    | 1.18    |
| 10-14     | 13.03 | 1.06                        | 0.94    | 1.18    | 1.17                   | 1.05    | 1.31    | 500-999    | 11.67 | 1.05                        | 0.93    | 1.18    | 1.21                   | 1.07    | 1.36    |
| 15+       | 27.57 | 1.10                        | 1.03    | 1.18    | 1.27                   | 1.20    | 1.36    | 1000+      | 20.05 | 1.08                        | 1.00    | 1.18    | 1.20                   | 1.11    | 1.30    |

LCL: Lower Confidence Level; UCL: Upper Confidence Level. Risk ratios and confidence intervals adjusted for age, sex, and year.

Table 3. Medication Use According to Weight Classification in Wellness Screening Participants

| Medication              | %     | Overweight vs Normal Weight |         |         | Population Attributable Fraction | Obese vs Normal Weight |         |         | Population Attributable Fraction |
|-------------------------|-------|-----------------------------|---------|---------|----------------------------------|------------------------|---------|---------|----------------------------------|
|                         |       | Risk Ratio                  | 95% LCL | 95% UCL |                                  | Risk Ratio             | 95% LCL | 95% UCL |                                  |
| Acid Reflux             | 5.43  | 1.23                        | 0.96    | 1.57    |                                  | 1.69                   | 1.34    | 2.12    | 3.61                             |
| Antibiotic              | 20.98 | 1.03                        | 0.93    | 1.15    |                                  | 1.16                   | 1.04    | 1.29    | 3.25                             |
| Anticonvulsants         | 1.38  | 0.82                        | 0.48    | 1.40    |                                  | 1.32                   | 0.83    | 2.11    |                                  |
| Antifungal              | 4.94  | 0.82                        | 0.64    | 1.05    |                                  | 1.23                   | 0.99    | 1.54    |                                  |
| Anxiety                 | 7.55  | 0.99                        | 0.82    | 1.20    |                                  | 0.99                   | 0.81    | 1.20    |                                  |
| Arthritis               | 10.98 | 1.07                        | 0.90    | 1.26    |                                  | 1.52                   | 1.31    | 1.77    | 5.40                             |
| Asthma                  | 8.54  | 1.46                        | 1.20    | 1.77    | 3.78                             | 1.83                   | 1.52    | 2.21    | 6.62                             |
| Birth Control           | 7.98  | 0.95                        | 0.81    | 1.11    |                                  | 0.85                   | 0.72    | 1.00    | 15.00*                           |
| Blood Thinner           | 1.15  | 1.84                        | 0.94    | 3.61    |                                  | 4.24                   | 2.30    | 7.81    | 3.59                             |
| Bowel/Rectum            | 2.95  | 0.85                        | 0.62    | 1.19    |                                  | 0.93                   | 0.68    | 1.29    |                                  |
| Cold/Flu/Allergy        | 17.75 | 1.20                        | 1.06    | 1.35    | 3.43                             | 1.34                   | 1.19    | 1.51    | 5.69                             |
| Depression              | 17.78 | 1.21                        | 1.07    | 1.36    | 3.60                             | 1.36                   | 1.21    | 1.53    | 6.02                             |
| Diabetes                | 6.03  | 2.48                        | 1.84    | 3.34    | 8.19                             | 5.34                   | 4.07    | 7.01    | 20.74                            |
| Edema                   | 5.03  | 1.58                        | 1.21    | 2.07    | 2.83                             | 2.74                   | 2.15    | 3.48    | 8.05                             |
| Eye Infection           | 11.87 | 1.13                        | 0.98    | 1.33    | 1.52                             | 1.30                   | 1.12    | 1.50    | 3.44                             |
| Herpes                  | 5.99  | 1.07                        | 0.89    | 1.29    | 0.42                             | 0.57                   | 0.45    | 0.72    | 43.00*                           |
| High Blood Pressure     | 16.02 | 1.71                        | 1.48    | 1.99    | 10.21                            | 2.66                   | 2.32    | 3.05    | 21.01                            |
| Inflammation            | 4.51  | 1.32                        | 1.02    | 1.73    | 1.42                             | 1.40                   | 1.08    | 1.83    | 1.77                             |
| Insomnia                | 3.99  | 1.05                        | 0.82    | 1.36    |                                  | 1.01                   | 0.78    | 1.32    |                                  |
| Muscle Spasms           | 4.31  | 1.40                        | 1.06    | 1.85    | 1.69                             | 1.83                   | 1.40    | 2.41    | 3.45                             |
| Nausea/Vomiting         | 4.86  | 1.24                        | 0.95    | 1.61    |                                  | 1.62                   | 1.27    | 2.08    | 2.93                             |
| Opioids                 | 16.79 | 1.18                        | 1.03    | 1.35    | 2.93                             | 1.61                   | 1.42    | 1.82    | 9.29                             |
| Osteoporosis            | 1.08  | 0.94                        | 0.60    | 1.50    |                                  | 0.50                   | 0.29    | 0.89    | 50.00*                           |
| Pain – non opioid       | 2.15  | 1.08                        | 0.71    | 1.61    |                                  | 1.65                   | 1.14    | 2.39    | 1.38                             |
| Skin                    | 6.86  | 0.91                        | 0.74    | 1.12    |                                  | 0.97                   | 0.79    | 1.19    |                                  |
| Statins                 | 11.93 | 2.32                        | 1.94    | 2.78    | 13.61                            | 2.84                   | 2.39    | 3.37    | 18.00                            |
| Stomach Acid            | 1.17  | 1.14                        | 0.65    | 1.99    |                                  | 2.02                   | 1.23    | 3.31    | 1.18                             |
| Teeth/Gums              | 0.43  | 1.80                        | 0.73    | 4.44    |                                  | 1.40                   | 0.53    | 3.67    |                                  |
| Thyroid                 | 12.79 | 1.09                        | 0.96    | 1.25    |                                  | 1.23                   | 1.08    | 1.40    | 2.86                             |
| Ulcers                  | 9.33  | 1.30                        | 1.09    | 1.55    | 2.72                             | 1.52                   | 1.28    | 1.80    | 4.63                             |
| Urinary Tract Infection | 3.23  | 0.98                        | 0.73    | 1.31    |                                  | 1.14                   | 0.86    | 1.51    |                                  |
| Vitamins/Minerals       | 2.98  | 0.84                        | 0.54    | 1.31    |                                  | 1.49                   | 1.01    | 2.19    | 1.44                             |

Note: Risk ratios and confidence intervals adjusted for age, sex, and year.

\*Preventive Fraction.

Table 4. Total Annual Cost for Selected Medications According to Weight Classification

|                  | Normal | Overweight | Obese |                         | Normal  | Overweight | Obese |
|------------------|--------|------------|-------|-------------------------|---------|------------|-------|
| Medication       | Mean   | Mean       | Mean  | Medication              | Mean    | Mean       | Mean  |
| Acid Reflux      | 3.51   | 15.84      | 14.94 | High Blood Pressure     | 11.5    | 40.0       | 55.4  |
| p value          | 0.0029 | 0.3115     | .     | p value                 | <.0001  | 0.013      | .     |
| Antibiotic       | 12.20  | 15.34      | 13.09 | Inflammation            | 8.25    | 13.61      | 5.66  |
| p value          | 0.8280 | 0.5933     | .     | p value                 | 0.4421  | 0.0210     | .     |
| Anticonvulsants  | 8.82   | 5.63       | 20.01 | Insomnia                | 2.7     | 4.6        | 2.8   |
| p value          | 0.0198 | 0.0034     | .     | p value                 | 0.9644  | 0.3237     | .     |
| Antifungal       | 0.74   | 2.11       | 2.22  | Muscle Spasms           | 0.1     | 0.4        | 3.9   |
| p value          | 0.0628 | 0.8977     | .     | p value                 | 0.0025  | 0.0172     | .     |
| Anxiety          | 1.2    | 1.6        | 1.1   | Nausea/Vomiting         | 0.2     | 1.1        | 1.0   |
| p value          | 0.7948 | 0.1226     | .     | p value                 | 0.007   | 0.6432     | 0     |
| Arthritis        | 139.2  | 126.4      | 125.2 | Opioids                 | 2.6     | 7.4        | 9.5   |
| p value          | 0.7593 | 0.9788     | .     | p value                 | <0.0001 | 0.1618     | .     |
| Asthma           | 32.0   | 38.4       | 46.5  | Osteoporosis            | 5.1     | 2.9        | 0.3   |
| p value          | 0.0256 | 0.2263     | .     | p value                 | 0.0505  | 0.2597     | .     |
| Birth Control    | 39.1   | 32.1       | 25.8  | Pain – Non Opioid       | 3.16    | 2.03       | 0.38  |
| p value          | 0.0005 | 0.1049     | .     | p value                 | 0.1552  | 0.3440     | .     |
| Blood Thinner    | 8.03   | 14.90      | 12.23 | Skin                    | 6.08    | 4.69       | 4.91  |
| p value          | 0.6338 | 0.7675     | .     | p value                 | 0.3537  | 0.8636     | .     |
| Bowels/Rectum    | 21.6   | 25.1       | 20.8  | Statins                 | 7.9     | 23.9       | 31.2  |
| p value          | 0.9168 | 0.5598     | .     | p value                 | <.0001  | 0.1066     | .     |
| Cold/Flu/Allergy | 13.9   | 21.1       | 17.5  | Stomach Infection       | 2.61    | 1.88       | 2.25  |
| p value          | 0.1763 | 0.1818     | .     | p value                 | 0.7248  | 0.4936     | .     |
| Depression       | 31.2   | 53.7       | 57.5  | Teeth/Gums              | 0.04    | 0.04       | 0.02  |
| p value          | 0.0009 | 0.6405     | .     | p value                 | 0.4433  | 0.4458     | .     |
| Diabetes         | 24.1   | 55.5       | 130.7 | Thyroid                 | 5.9     | 7.6        | 10.1  |
| p value          | <.0001 | <.0001     | .     | p value                 | 0.0003  | 0.0356     | .     |
| Edema            | 0.6    | 3.0        | 3.4   | Ulcers                  | 0.6     | 6.8        | 4.0   |
| p value          | 0.0006 | 0.6529     | .     | p value                 | 0.1366  | 0.3589     | .     |
| Eye Infection    | 4.4    | 4.8        | 4.2   | Urinary Tract Infection | 1.49    | 0.95       | 1.71  |
| p value          | 0.7459 | 0.6384     | .     | p value                 | 0.7002  | 0.1915     | .     |
| Herpes           | 14.43  | 15.02      | 7.63  | Vitamins/Minerals       | 0.3     | 1.5        | 0.9   |
| p value          | 0.0145 | 0.0094     | .     | p value                 | 0.251   | 0.3174     | .     |

Means adjusted for age, sex, and year.

# BMJ Open

## To what extent does sex, age, and BMI impact medical and pharmacy costs? A retrospective cohort study involving employees in a large school district

|                                 |                                                                                                                |
|---------------------------------|----------------------------------------------------------------------------------------------------------------|
| Journal:                        | <i>BMJ Open</i>                                                                                                |
| Manuscript ID                   | bmjopen-2018-024078.R1                                                                                         |
| Article Type:                   | Research                                                                                                       |
| Date Submitted by the Author:   | 21-Nov-2018                                                                                                    |
| Complete List of Authors:       | Merrill, Ray; Brigham Young University, Public Health<br>Fowers, Rylan; Brigham Young University               |
| <b>Primary Subject Heading</b>: | Pharmacology and therapeutics                                                                                  |
| Secondary Subject Heading:      | Public health, Epidemiology                                                                                    |
| Keywords:                       | health risks, screening, prescription medication, health risk appraisal, body mass index, pharmaceutical costs |
|                                 |                                                                                                                |

SCHOLARONE™  
Manuscripts

1  
2  
3  
4  
5  
6  
7  
8  
9  
10  
11  
12  
13  
14  
15 **To what extent does sex, age, and BMI impact medical and pharmacy costs? A**  
16 **retrospective cohort study involving employees in a large school district**  
17  
18

19  
20 Ray M. Merrill, PhD, MPH, Rylan P. Fowers, BS  
21

22  
23 Department of Public Health, College of Life Sciences, Brigham Young University  
24  
25  
26  
27  
28  
29  
30  
31

32 Corresponding Author:  
33

34 Ray M. Merrill  
35

36 Department of Public Health  
37

38 2063 Life Sciences Building  
39

40 Provo, Utah 84602  
41

42 Email: [Ray\\_Merrill@byu.edu](mailto:Ray_Merrill@byu.edu)  
43

44 Telephone: 801-422-9788  
45

46 Fax: 801-422-9363  
47  
48  
49

50 Keywords: body mass index, obesity, prevention, pharmaceuticals, screening  
51

52 Word count: 3527  
53  
54  
55  
56  
57  
58  
59  
60

1  
2  
3 **Objective** To identify the extent that sex, age, and body mass index (BMI) is associated with  
4  
5 medical and pharmacy costs.  
6

7  
8 **Design** Retrospective cohort.  
9

10 **Setting** A school district in the Western United States involving 2531 workers continuously  
11  
12 employed during 2011-2014.  
13

14 **Main outcome measures** Medical and pharmacy costs and BMI.  
15

16  
17 **Results** Approximately 84% of employees participated in the wellness screening. Participants  
18  
19 were 1.03 (95% CI 1.01- 1.06) times more likely to be women and younger (M = 47.8 vs. 49.8, p  
20  
21 < 0.001). Median medical and pharmacy costs were higher for women than men, increased with  
22  
23 age, and were greater in morbidly obese individuals (p < 0.001). Annual pharmacy claims were  
24  
25 18% more likely to be filed by women than men, 23% more likely filed by those aged  $\geq 60$  versus  
26  
27 <40 years, and 6% more likely filed by morbidly obese individuals than of normal weight (p <  
28  
29 0.001) individuals. Greater medical and pharmacy costs in older age were most pronounced in  
30  
31 underweight and morbidly obese groups. Higher use of medication among women than men was  
32  
33 primarily because of drugs involving birth control, osteoporosis, thyroid disease, and urinary  
34  
35 tract infection. Higher medication use in older age was primarily related to medications used to  
36  
37 treat gastrointestinal problems. Medication use was positively associated with BMI weight  
38  
39 classifications for most of the 32 drug types considered, with exceptions involving birth control,  
40  
41 herpes, and osteoporosis. A J-shape relationship was observed between BMI and medication use  
42  
43 for acne, antibiotic, cold/influenza/allergy, eye infection, edema, muscle spasms, pain, and  
44  
45 ulcers.  
46  
47  
48  
49  
50  
51

52  
53 **Conclusions** Lowering medical and pharmacy costs requires weight management in older ages,  
54  
55 particularly for underweight and obese men and women. Medical costs were significantly  
56  
57  
58  
59  
60

1  
2  
3 reduced, likely due to effective drug treatment and prevention. Higher pharmacy costs for certain  
4  
5 drugs among underweight individuals may be associated with poorer nutrition.  
6  
7  
8  
9

#### 10 Strengths and limitations of this study

- 11 • A large cohort of employees was available for retrospective assessment of the  
12 association between sex, age, and BMI with medical and pharmacy costs.  
13
- 14 • The association between sex, age, and 32 specific types of medication were assessed,  
15 some of which have not been previously considered.  
16
- 17 • All active employees received employer-sponsored medical and pharmacy coverage,  
18 and above 84% had information that allowed us to determine body mass.  
19
- 20 • A few medications may have contributed to weight gain, which we were unable to  
21 adjust for in the current study.  
22
- 23 • The study population and patterns of prescription drug use may limit generalization of  
24 the results.  
25  
26  
27  
28  
29  
30  
31  
32  
33  
34  
35



## Introduction

Many companies offer wellness-screening programs consisting of health risk assessment and biometric screening. The 2016 Employer Health Benefits Survey found that among large firms (200 or more employees) in the United States, 59% offered health risk assessment (of which 32% had an incentive component) and 53% offered biometric screening (of which 31% included an incentive component).<sup>1</sup> These programs are intended to promote a greater sense of personal responsibility for lifestyle choices, identify the need for health behavior change, reduce future health problems, encourage patient management of existing health problems, decrease worker absenteeism, and improve job satisfaction and worker productivity.<sup>2-7</sup> Larger companies are also required to offer employer-sponsored medical and pharmacy coverage for their employees. Hence, information obtained on the health risk assessment and screenings can be compared with the medical and pharmacy costs.

Medical and pharmacy costs are influenced by a number of factors, including sex, age, and Body Mass Index (BMI).<sup>8-10</sup> Although medical costs are often a response to acute and chronic health conditions, pharmaceutical costs are often used to prevent more serious health problems. For example, antihypertensive medication, or statins, are useful in preventing cardiovascular disease;<sup>11-13</sup> multivitamins or folic acid for preventing congenital abnormalities;<sup>14</sup> aspirin and non-steroidal anti-inflammatory for preventing colorectal cancer;<sup>15</sup> bronchodilators, steroids, and anti-inflammatories for managing asthma;<sup>16</sup> and nonsteroidal anti-inflammatory drugs, steroids, analgesics, and immunosuppressive drugs for managing arthritis.<sup>17</sup> Consequently, wellness screening may actually increase use of prescription medication.<sup>18</sup>

1  
2  
3 Although a person's body weight may be associated with increased risk for various  
4 chronic health conditions and poorer health-related quality of life,<sup>19 20</sup> only in the last 15 years or  
5 so has its impact on healthcare expenditures been assessed.<sup>10</sup> Further, only a small number of  
6 studies have explored the association between body weight and prescription drug use. A study  
7 conducted in England found that overweight and obese individuals were more likely to receive  
8 medication for the cardiovascular system; gastrointestinal system; respiratory system; central  
9 nervous system; endocrine system; gynecology/urinary disorders; musculoskeletal and joint  
10 disorders; infections; eye, ear and oropharynx problems; and skin disorders.<sup>21</sup> A study in Sweden  
11 showed that use and cost of medication in general are significantly greater in obese individuals.<sup>22</sup>  
12 A study in the United States found that obesity was responsible for \$7 billion in Medicare  
13 prescription drug costs in 2006.<sup>23</sup> Another study conducted in the United States identified  
14 increased medication use during 1988 through 2012, with the increase most prominent among  
15 obese individuals.<sup>24</sup> A large cross-sectional study of 9789 adults in the National Health and  
16 Nutrition Examination Survey (NHANES) found that obese individuals utilize several  
17 prescription drugs (e.g., hypertension, lipid-lowering, and diabetes medications) more frequently  
18 than normal weight individuals.<sup>25</sup> Another study based on NHANES data found that while  
19 medication use increased over time for obese individuals compared with normal weight  
20 individuals ages 40 years and older, the increase was only marginal for those aged 25-39 years.<sup>26</sup>  
21 One study found that obese individuals used more analgesic, asthma, cardiovascular, diabetes,  
22 intranasal allergic rhinitis, thyroid, and ulcer medications.<sup>27</sup>  
23  
24  
25  
26  
27  
28  
29  
30  
31  
32  
33  
34  
35  
36  
37  
38  
39  
40  
41  
42  
43  
44  
45  
46  
47  
48

49 The purpose of the current study was to identify the extent to which sex, age, and BMI  
50 weight classifications are associated with medical and pharmacy costs among a large group of  
51 teachers, administrators, and other school staff. These associations are also evaluated for 32 more  
52  
53  
54  
55  
56  
57  
58  
59  
60

1  
2  
3 commonly prescribed medications.<sup>28</sup> Although studies have previously looked at the association  
4  
5 between BMI and prescription medications, we evaluated some drugs that have not been  
6  
7 formerly considered, and the breadth of drugs covered is greater than in past studies. In addition,  
8  
9 evaluating the effect of being underweight on medical and pharmacy costs, and on specific drug  
10  
11 types, is unique to this study.  
12  
13  
14  
15

## 16 17 **Methods**

### 18 19 *Patient and Public Involvement*

20  
21 A retrospective cohort study was conducted that associated sex, age, and BMI with medical and  
22  
23 pharmacy cost data for employees of a large school district in the western United States. Specific  
24  
25 patients and or the general public was not involved in this study. Body mass index was obtained  
26  
27 from those employees who participated in wellness screening. Employer-sponsored insurance  
28  
29 was available to all employees. The school district comprised six high schools, eight junior high  
30  
31 schools, and 31 elementary schools. Employees consisted of approximately three teachers to  
32  
33 every one staff member (cooks, bus drivers, grounds keepers, maintenance workers,  
34  
35 administrators, clerical workers, etc.). We were not provided specific job type and salary for each  
36  
37 employee. However, we can assume that the teachers, administrators, counselors, and nurses,  
38  
39 who represent almost all of the employees, had at least a college degree, that their salaries are  
40  
41 commensurate with other school districts, and that the employer-sponsored insurance coverage  
42  
43 was not strongly impacted by the employee's income or education.  
44  
45  
46  
47  
48

49 The study involved the academic years 2010-11, 2011-12, 2012-13, and 2013-14.  
50  
51 Employees were offered wellness screenings (personal health risk assessment [HRA] and  
52  
53 biometric evaluation) each fall. Medical and pharmacy claims data were also obtained for the  
54  
55  
56  
57  
58  
59  
60

1  
2  
3 employees in each academic year. Wellness screening and claims data were combined with a file  
4  
5 of eligible employees and assessed within each academic year. The eligibility file contained  
6  
7 information on current employment, sex, age, and year.  
8  
9

### 10 11 12 *Wellness Screening* 13

14  
15 All employees were offered wellness screening. Although participation was voluntary, it  
16  
17 was promoted through incentives. The HRA involved 36 questions. Biometric screenings  
18  
19 involved measurements of body mass index (BMI kg/m<sup>2</sup>), blood pressure (mm Hg), cholesterol  
20  
21 (mg/dL), and glucose (mg/dL). The HRA and biometric screenings were provided at no cost to  
22  
23 the employees, and were made available on location or with a personal physician. A health nurse  
24  
25 or physician assisted the employee in interpreting their HRA and screening results, in order to  
26  
27 help guide their need for lifestyle changes and control measures. The current study only  
28  
29 considers BMI. Weight classifications are based on commonly accepted ranges of BMI, as  
30  
31 follows: underweight (BMI < 18.5), normal weight (BMI 18.5-24), overweight (BMI 25-29),  
32  
33 obese (BMI 30-39), and morbidly obese (BMI 40+).  
34  
35  
36  
37  
38  
39

### 40 41 *Medical and Pharmacy Claims Data* 42

43 All active employees received employer-sponsored medical and pharmacy coverage, for  
44  
45 themselves and their families. The school district is fully insured with a retained-retention  
46  
47 agreement that makes the plan act very much like a self-funded health plan. Each month the  
48  
49 district pays a health insurance premium for the cost of healthcare and a small premium for  
50  
51 reinsurance of catastrophic claims. Catastrophic claims greater than \$250,000 are reinsured by a  
52  
53 stop loss policy and are not paid for by the school district. Employee pharmacy data do not  
54  
55  
56  
57  
58  
59

1  
2  
3 include over-the-counter drugs, but only those medications requiring a prescription. In the United  
4  
5 States, a drug is sold over-the-counter if the Food and Drug Administration deems it as  
6  
7 sufficiently safe and effective. These medications are not included in the current study. Further,  
8  
9 medical and pharmacy cost represents the amount paid by the insurance company as well as  
10  
11 copays by the employee.  
12  
13  
14  
15

### 16 17 *Statistical Techniques*

18  
19 Counts, means, standard deviations, medians, and percentages were used to describe the  
20  
21 study population. Pair-wise comparisons of means were evaluated for statistical significance  
22  
23 using the Student-Newman-Keuls Test. Risk ratios compare having a medical and pharmacy cost  
24  
25 above the 50<sup>th</sup> percentile (vs. below), 75<sup>th</sup> percentile (vs. below), and 90<sup>th</sup> percentile (vs. below).  
26  
27 Statistical significance was determined by the corresponding 95% confidence intervals. For  
28  
29 selected medications, the risk of medication use was compared using risk ratios and attributable  
30  
31 fraction percentages across the levels of sex, age, and BMI weight classifications. Statistical  
32  
33 significance of differences in percent use of selected medications across sex, age, and BMI  
34  
35 categories was based on two-sided tests of significance were based on the 0.05 level against a  
36  
37 null hypothesis of no association. Data was evaluated using the statistical software package PC-  
38  
39 SAS (version 9.4; SAS Institute, Inc., 2014).  
40  
41  
42  
43  
44  
45

### 46 47 **Results**

48  
49 In 2010-11, there were 3023 eligible employees, of which 2531 (83.72%) remained employed  
50  
51 through the academic year 2013-14. Those more likely to remain employed over the study period  
52  
53 were 40-59 years of age and had lower medical and pharmacy costs (Table 1). In 2010-11, ages  
54  
55  
56  
57  
58  
59

1  
2  
3 ranged from 18-76, with mean age significantly younger for those who remained employed (46.9  
4 vs. 49.2,  $p < 0.0001$ ). Those who remained employed had significantly lower mean medical costs  
5 (\$3056 vs. \$7887,  $p < 0.0001$ ) and mean pharmacy costs (\$859 vs. \$1105,  $p = 0.0387$ ). The  
6 results of this study are based on those continuously employed over the four academic years.  
7  
8  
9

10  
11  
12  
13 Most employees participated in annual wellness screening (84.1% in 2010-11, 84.4% in  
14 2011-12, 87.6% in 2012-13, and 80.7% in 2013-14). In 2010-11, there was no significant  
15 difference in mean medical cost between those who participated in wellness screening and those  
16 who did not (\$3148 vs. \$2571,  $p = 0.2900$ ). However, median medical cost was significantly  
17 greater for those who participated in wellness screening (\$588 vs. \$470,  $p = 0.0454$ ). For all  
18 academic years, women were 1.03 (95% CI 1.01- 1.06) times more likely than men to complete  
19 annual wellness screenings, after adjusting for age and academic year. Participants in wellness  
20 screening were significantly younger ( $M = 47.8$  vs.  $49.8$ ,  $p < 0.0001$ ), after adjusting for sex and  
21 year. Those participating in wellness screening had significantly lower mean medical cost  
22 (\$3093 vs. \$4181,  $p = 0.0013$ ), but experienced no significant difference in mean annual  
23 pharmacy costs, after adjusting for age, sex, and year.  
24  
25  
26  
27  
28  
29  
30  
31  
32  
33  
34  
35  
36  
37  
38

39 Among participants in annual wellness screening, mean BMI remained constant across  
40 the academic years (Table 2). Mean BMI was greater for men than women and in ages 40 years  
41 and older. Medical and pharmacy costs were highly positively skewed, with considerable  
42 variability. Hence, identifying significant differences in the mean costs across the levels of sex,  
43 age, and year, were less likely to occur than to find significant differences in the median costs  
44 across the levels of these variables. Medical costs were higher for women than men, increased  
45 with age, and were greater in morbidly obese individuals. Pharmacy costs were higher in women  
46 than men, increased with age, and were lowest in those of normal weight.  
47  
48  
49  
50  
51  
52  
53  
54  
55  
56  
57  
58  
59  
60

1  
2  
3 The risk of medical and pharmacy costs above the 50<sup>th</sup>, 75<sup>th</sup>, and 90<sup>th</sup> percentiles are  
4 shown according to sex, age, and BMI weight classification in Table 3. Higher BMI has a greater  
5 impact on higher percentiles of medical and pharmacy costs. For example, morbidly obese  
6 compared with normal weight are 1.13 (13%), 1.30 (30%), and 1.93 (93%) more likely to have  
7 pharmacy costs above the 50<sup>th</sup>, 75<sup>th</sup>, and 90<sup>th</sup> percentiles, respectively. Medical and pharmacy  
8 costs above these percentiles are greater in women than men and increase with age.  
9

10  
11  
12 Associations between selected percentiles of medical and pharmacy costs and BMI  
13 weight classifications varied according to age (Figure 1), but not sex (data not shown). Greater  
14 medical and pharmacy costs with older age groups are seen in the graph. However, the  
15 increasing costs with higher age are most pronounced in the underweight and morbidly obese  
16 groups.  
17

18  
19  
20 Medication use is shown across sex, age, and BMI groups in Table 4. For any  
21 medication, women were 18% more likely to file a claim than men, employees 60 years of age or  
22 older were 23% more likely to file a claim than those less than 40 years, and morbidly obese  
23 were 6% more likely to file a claim than those of normal weight. For 22 of the 32 medications  
24 considered, the percentage of annual claims was higher for women than men. For only high  
25 blood pressure was the percentage of claims greater for men than women. For 24 of the  
26 medications, the percentage of annual claims increased with age. For 23 of the medications, the  
27 percentage of annual claims was associated with BMI (19 positively and 4 negatively). The  
28 strongest positive associations involved diabetes, high cholesterol (statins), high blood pressure,  
29 and edema. Negative associations involved acne, birth control, Herpes, and osteoporosis. The  
30 highest annual percent of acne, antibiotic, cold/influenza/allergy, and eye infection medications  
31 occurred in underweight individuals. For edema, muscle spasms, pain, and ulcers, medication  
32  
33  
34  
35  
36  
37  
38  
39  
40  
41  
42  
43  
44  
45  
46  
47  
48  
49  
50  
51  
52  
53  
54  
55  
56  
57  
58  
59  
60

1  
2  
3 use was comparatively high in underweight individuals, dropped for normal weight, and then  
4  
5 increased in higher weight classifications.  
6  
7

8 We also report the attributable fraction in the population. For example, this statistic says  
9  
10 that 8.82% of diabetes medication is attributed to being overweight, 20.34% is attributed to being  
11  
12 obese, and 30.43% is attributed to being morbidly obese. Where the risk ratio is less than 1, the  
13  
14 preventive fraction can be estimated. For example, the risk of requiring osteoporosis medication  
15  
16 is lower for obese compared with normal weight employees (i.e., Risk Ratio = 0.54). The  
17  
18 corresponding preventive fraction is 66%, meaning in the absence of obesity there would be 66%  
19  
20 fewer claims for osteoporosis medication. The attributable fraction in the population and the  
21  
22 preventive fraction both assume a cause-and-effect association between exposure and disease.  
23  
24  
25  
26  
27  
28  
29

### 30 **Discussion**

31  
32 The current study identified the degree to which sex, age, and BMI are associated with medical  
33  
34 and pharmacy costs among employees in a large school district. Associations were also evaluated  
35  
36 for 32 commonly prescribed medications.<sup>28</sup> The study extends previous research by including  
37  
38 certain medications not previously evaluated and considering associations for all BMI weight  
39  
40 classifications.  
41  
42

43 Higher medical and pharmacy costs among women, in older age, and among those not of  
44  
45 normal weight is consistent with previous research.<sup>8-10</sup> Greater medical and pharmacy costs with  
46  
47 older age are most pronounced in the underweight and morbidly obese groups. Hence, weight  
48  
49 management at older ages appears particularly important in terms of lowering medical and  
50  
51 pharmacy costs.  
52  
53  
54  
55  
56  
57  
58  
59  
60



1  
2  
3 Higher medication use in women than men was primarily because of drugs involving  
4 birth control, osteoporosis, thyroid disease, and urinary tract infection. Prescription costs for  
5 vitamins/minerals were also noticeably higher in women than men. Family planning and prenatal  
6 care may explain the greater use of birth control medications and vitamins/minerals among  
7 women. Loss of estrogen in women at older ages and female reproductive hormones may  
8 contribute to the higher level of osteoporosis and thyroid disease in women.<sup>29 30</sup>

9  
10  
11 Medication use was higher in those aged 60 years and older compared with those younger  
12 than 40, primarily because of diabetes, edema, high blood pressure, high cholesterol (statins),  
13 and thyroid disease. Previous research has shown that the risk of these diseases increase with  
14 age.<sup>31-35</sup> Medication use also noticeably increased with age for acid reflux, bowel/rectum,  
15 inflammation, and stomach acid. This is consistent with older age tending to be associated with  
16 more gastrointestinal problems.<sup>36</sup>

17  
18 Medication use was highest in those who were morbidly obese. We found positive  
19 associations between body weight and higher use of medications for treating acid reflux, fungus,  
20 bacterial infections, arthritis, asthma, colds, influenza, allergies, depression, diabetes, edema,  
21 high blood pressure, muscle spasms, nausea/vomiting, pain, high cholesterol, stomach acid,  
22 thyroid, and ulcers. Other studies have identified a similar associations.<sup>21 24 25 27</sup> Morbidly obese  
23 individuals were also more likely to be prescribed vitamins and minerals than normal weight  
24 individuals. We did not find an association between body weight and increased use of  
25 medication for the bowel/rectum, skin, or urinary tract, which was counter to that found in other  
26 studies.<sup>21 37-39</sup> We also assessed but did not find a significant association for medications used to  
27 treat anxiety, insomnia, convulsions, or teeth and gums. The insignificant finding for  
28 anticonvulsants and teeth and gums may be because of insufficient power (i.e., small numbers).

1  
2  
3 Finally, we assessed the association between body weight and medications for birth control,  
4 herpes, and osteoporosis, wherein significant negative associations were found. We are not  
5 aware of other studies that have looked at the association between body weight and medications  
6 used for colds, influenza, depression, edema, birth control, herpes, or osteoporosis.  
7  
8  
9  
10  
11

12 Greater use of medication to treat acid reflux or stomach acid among individuals with  
13 higher BMI is consistent with previous research showing hospitalization rates for reflux disease  
14 to be positively associated with BMI.<sup>40 41</sup> Another study found that higher BMI was associated  
15 with increased gastroesophageal reflux in both normal and overweight individuals.<sup>42</sup> Heavier  
16 body weight can add pressure to the stomach and diaphragm, thereby resulting in reflux. Further,  
17 increased use of medication for nausea/vomiting among individuals with higher BMI weight  
18 classifications is consistent with other research.<sup>43</sup>  
19  
20  
21  
22  
23  
24  
25  
26  
27  
28

29 The positive association between higher BMI and increased use of medication for ulcers  
30 is consistent with other research, particularly peptic (gastric and duodenal) ulcers.<sup>44 45</sup> The  
31 mechanism to explain the association between obesity and peptic ulcer disease remains unclear.  
32  
33  
34  
35  
36  
37  
38  
39  
40  
41  
42  
43  
44  
45  
46  
47  
48  
49  
50  
51  
52  
53  
54  
55  
56  
57  
58  
59  
60

Previous research has shown that overweight and obese individuals are at greater risk for  
infections.<sup>37-49</sup> This is consistent with our findings that show increased use of antibiotics and  
medication for acne, colds/influenza/allergy, and eye infections among obese individuals.  
However, it has been shown previously that antibiotics can also weaken the immune system,<sup>50</sup> as  
well as lead to obesity.<sup>51</sup> Some inflammatory diseases known to be associated with obesity in  
which we found a positive association between obesity and medication included influenza,<sup>52 53</sup>  
heart disease,<sup>54</sup> diabetes,<sup>55</sup> allergies,<sup>56-59</sup> asthma,<sup>60</sup> edema,<sup>61-63</sup> and arthritis.<sup>64-67</sup> A compromised

1  
2  
3 immune system may also trigger autoimmune diseases, including rheumatoid arthritis and  
4  
5 thyroid disease,<sup>68</sup> as indicated in the current study.  
6  
7

8 Overweight and obese individuals were more likely to receive cold, influenza, or allergy  
9 medication. Obesity is associated with impaired immune response to influenza vaccination in  
10 humans.<sup>69</sup> Because vaccination is less successful for obese individuals,<sup>70 71</sup> a greater level of  
11 medication may be sought for treating colds, influenza, and allergies.  
12  
13  
14  
15  
16  
17

18 Overweight and obese individuals received higher levels of pain medication. Research  
19 indicates that the nature of the relationship between higher BMI and pain is likely indirect.<sup>72</sup> For  
20 example, greater body weight is associated with osteoarthritis, which, in turn, leads to pain.<sup>73</sup>  
21 Being overweight or obese may result in greater risk for back pain, joint pain, and muscle  
22 spasms.<sup>74</sup> One study also found that obese individuals were more sensitive than those of normal  
23 weight to pressure pain.<sup>75</sup>  
24  
25  
26  
27  
28  
29  
30  
31  
32

33 We found that higher BMI was associated with depression medication, as consistent with  
34 previous research.<sup>76-79</sup> In one study, the age-adjusted level of depression among adults (ages 20  
35 and older) in the United States was 43.2% for those with depression compared with 33.0% for  
36 those without depression.<sup>80</sup> It may be that higher use of prescription medication for depression  
37 among those with greater BMI is partly because these people are more likely to experience other  
38 conditions related to depression, such as heart disease and diabetes.<sup>81-83</sup>  
39  
40  
41  
42  
43  
44  
45  
46

47 There was more use of vitamins/minerals among morbidly obese employees. Of the  
48 prescribed vitamins/minerals only 8.0% involved vitamin B and 57.3% involved vitamin D. A  
49 previous study showed an association between low vitamin B12 and being obese.<sup>84</sup> Another  
50 study found that the prevalence of vitamin D deficiency was 35% greater in obese individuals.<sup>85</sup>  
51  
52  
53  
54  
55  
56  
57  
58  
59  
60

1  
2  
3 Acne, antibiotic, cold/influenza/allergy, and eye infection medications were prescribed  
4 more often for underweight individuals. This is consistent with underweight individuals having  
5 poorer nutrition and, consequently, a weakened immune system.<sup>86</sup> For edema, muscle spasms,  
6 pain, and ulcers, medication use showed a J-shape relationship with BMI weight classification.  
7  
8 Poor nutrition may also explain the higher levels of medication use among underweight  
9 individuals for these medications. Despite mean medical costs being similar for those who  
10 participated in wellness screening during the first year of the study, over the four academic years,  
11 participants in wellness screening ended up having significantly lower mean medical costs.  
12  
13 However, pharmacy costs did not go down. It has been shown that wellness screening can cause  
14 the number and cost of pharmaceuticals to go up, at least initially, as the need for treatment is  
15 identified.<sup>87</sup> Identified treatment needs can then, in turn, help prevent more costly health  
16 problems in the future. For example, medications used to treat high blood pressure can result in  
17 lowering the risk of diabetes, heart disease, stroke and kidney disease; treatment of insomnia can  
18 help lower the risk of irritability, depression or anxiety, difficulty paying attention, and accidents  
19 due to increased errors; treatment of high cholesterol with statins can help lower the risk of  
20 cardiovascular disease; treatment of oral infections can help reduce the risk of diabetes,  
21 cardiovascular disease, and preterm birth; and vitamins/minerals can help prevent a host of  
22 diseases (scurvy, rickets, anemia, neural tube defects, pellagra, etc.). High blood pressure and  
23 statin medications were among the highest prescribed in our study.  
24  
25  
26  
27  
28  
29  
30  
31  
32  
33  
34  
35  
36  
37  
38  
39  
40  
41  
42  
43  
44  
45  
46

47 A limitation of this study involves external validity (generalizability). Specifically, the  
48 study considered those individuals who remained employed over all four academic years. These  
49 individuals were generally healthier. The study also focused on those who completed wellness  
50 screening because they contained BMI information. These employees were more likely women  
51  
52  
53  
54  
55  
56  
57  
58  
59  
60

1  
2  
3 and younger. In addition, the causal direction between medication use and BMI could not be  
4  
5 determined. That is, some medications may have contributed to body mass whereas others were  
6  
7 in response to body mass. Finally, the current study did not have information on the use of  
8  
9 vitamins or minerals obtained over the counter and small numbers made it impossible to evaluate  
10  
11 the relationship between specific types of vitamins/minerals and sex, age, and BMI.  
12  
13  
14  
15  
16  
17

## 18 **Conclusion**

19  
20  
21 Weight management at older ages, particularly in underweight and morbidly obese individuals, is  
22  
23 most important for lowering medical and pharmacy costs. Medical costs decreased, possibly  
24  
25 because of effective drug treatment and prevention. Pharmacy costs remained constant, possibly  
26  
27 because screening identified a need for certain medications. Greater use of medication among  
28  
29 women than men is primarily because of drugs involving birth control, osteoporosis, thyroid  
30  
31 disease, and urinary tract infection. Greater medication use in older age is primarily related to  
32  
33 medications used to treat gastrointestinal problems. Medication use was positively associated  
34  
35 with BMI for most of the conditions being treated, with exceptions involving birth control,  
36  
37 herpes, and osteoporosis. A J-shape relationship between BMI weight classification and  
38  
39 medication use for acne, antibiotic, cold/influenza/allergy, eye infection, edema, muscle spasms,  
40  
41 pain, and ulcers may be because of poorer nutrition in underweight individuals.  
42  
43  
44  
45  
46  
47  
48  
49  
50  
51  
52  
53  
54  
55  
56  
57  
58  
59  
60

## References

1. 2016 Employer Health Benefits Survey. kff.org. <http://www.kff.org/health-costs/report/2016-employer-health-benefits-survey/>. Published September 14, 2016. Accessed February 21, 2018.
2. Chen L, Hannon PA, Laing SS, Kohn MJ, Clark K, Pritchard S, Harris JR. Perceived workplace health support is associated with employee productivity. *Am J Health Promot.* 2015;29(3):139-146.
3. Centers for Disease Control and Prevention. cdc.gov. <http://www.cdc.gov/sustainability/worksitewellness/> Worksite wellness. Updated December 9, 2014. Accessed March 18, 2018.
4. Michaels CN, Greene AM. Worksite wellness: increasing adoption of workplace health promotion programs. *Health Promot Pract.* 2013;14(4):473-479.
5. Witt LB, Olsen D, Ablah E. Motivating factors for small and midsized businesses to implement worksite health promotion. *Health Promot Pract.* 2013;14(6), 876-884.
6. Niessen MA, Kraaijenhagen RA, Dijkgraaf MG, van Pelt D, van Kalken CK, Peek N. Impact of a Web-based worksite health promotion program on absenteeism. *J Occup Environ Med.* 2012;54(4):404-408.
7. Kaspin LC, Gorman KM, Miller RM. Systematic review of employer-sponsored wellness strategies and their economic and health-related outcomes. *Popul Health Manag.* 2013;16(1): 14-21.
8. Metge C, Black C, Peterson S, Kozyrskyi AL. The population's use of pharmaceuticals. *Med Care.* 1999;37(6 Suppl):JS42-JS59.

- 1  
2  
3 9. Bertakis K, Azari R, Helms L, Callahan E, Robbins J. Gender differences in the utilization of  
4 health care services. *J Fam Pract.* 2000;49(2):147-152.  
5  
6
- 7  
8 10. Arterburn DE, Maciejewski ML, Tsevat J. Impact of morbid obesity on medical expenditures  
9 in adults. *Int J Obes.* 2005;29(3):334-339.  
10  
11
- 12 11. Karmali KN, Lloyd-Jones DM, Berendsen M, et al. Drugs for primary prevention of  
13 atherosclerotic cardiovascular disease: an overview of systematic reviews. *JAMA Cardiol.*  
14 2016;1(3):341-349.  
15  
16
- 17 12. Fretheim A, Odgaard-Jensen, Brørs O, Madsen S, et al. Comparative effectiveness of  
18 antihypertensive medication for primary prevention of cardiovascular disease: systematic  
19 review and multiple treatments meta-analysis. *BMC Med.* 2012;10:33.  
20  
21
- 22 13. Taylor F, Huffman MD, Macedo A, et al. Statins for the primary prevention of  
23 cardiovascular disease. *Cochrane.* 2013. [http://www.cochrane.org/CD004816/VASC\\_statins-](http://www.cochrane.org/CD004816/VASC_statins-primary-prevention-cardiovascular-disease)  
24 primary-prevention-cardiovascular-disease. Accessed February 21, 2018.  
25  
26
- 27 14. Czeizel AE. Birth defects are preventable. *Int J Med Sci.* 2005;2(3):91-92.  
28  
29
- 30 15. Chan AT, Giovannucci EL. Primary prevention of colorectal cancer. *Gastroenterology.*  
31 2010;138(6):2029-2043.  
32  
33
- 34 16. Asthma. Mayo Clinic. [https://www.mayoclinic.org/diseases-conditions/asthma/diagnosis-](https://www.mayoclinic.org/diseases-conditions/asthma/diagnosis-treatment/drc-20369660)  
35 treatment/drc-20369660. Published March 9, 2018. Accessed February 24, 2018.  
36  
37
- 38 17. Arthritis. Mayo Clinic. [https://www.mayoclinic.org/diseases-conditions/arthritis/diagnosis-](https://www.mayoclinic.org/diseases-conditions/arthritis/diagnosis-treatment/drc-20350777)  
39 treatment/drc-20350777. Published March 7, 2018. Accessed February 24, 2018.  
40  
41
- 42 18. Preventive Medicine Reports Paper  
43  
44
- 45 19. Thompson D, Edelsberg J, Colditz GA, Bird AP, Oster G. Lifetime health and economic  
46 consequences of obesity. *Arch Intern Med.* 1999;119(18):2177-2183.  
47  
48  
49  
50  
51  
52  
53  
54  
55  
56  
57  
58  
59  
60

- 1
  - 2
  - 3
  - 4
  - 5
  - 6
  - 7
  - 8
  - 9
  - 10
  - 11
  - 12
  - 13
  - 14
  - 15
  - 16
  - 17
  - 18
  - 19
  - 20
  - 21
  - 22
  - 23
  - 24
  - 25
  - 26
  - 27
  - 28
  - 29
  - 30
  - 31
  - 32
  - 33
  - 34
  - 35
  - 36
  - 37
  - 38
  - 39
  - 40
  - 41
  - 42
  - 43
  - 44
  - 45
  - 46
  - 47
  - 48
  - 49
  - 50
  - 51
  - 52
  - 53
  - 54
  - 55
  - 56
  - 57
  - 58
  - 59
  - 60
20. Pi-Sunyer X. The medical risks of obesity. *Postgrad Med.* 2009;121(6):21-33.
21. Kinge JM, Morris S. Association between obesity and prescribed medication use in England. *Econ Hum Biol.* 2014;15:47-55.
22. Narbro K, Agren G, Jonsson E, et al. Pharmaceutical costs in obese individuals: comparison with a randomly selected population sample and long-term changes after conventional and surgical treatment: the SOS intervention study. *Arch Intern Med.* 2002;162(18):2061-2069.
23. Finkelstein EA, Trogdon JG, Cohen JW, Dietz W. Annual medical spending attributable to obesity: payer-and service-specific estimates. *Health Aff.* 2009;28(5):w822-31.
24. Randhawa AK, Parikh JS, Kuk JL. Trends in medication use by body mass index and age between 1988 and 2012 in the United States. *PLoS One.* 2017 Sep 20;12(9):e0184089.
25. Kit BK, Ogden CL, Flegal KM. Prescription medication use among normal weight, overweight, and obese adults, United States, 2005-2008. *Ann Epidemiol.* 2012;22(2):112-119.
26. Jarrett B, Bloch GJ, Bennett D, Bleazard B, Hedges D. The influence of body mass index, age and gender on current illness: a cross-sectional study. *Int J Obes.* 2010;34(3):429-436.
27. Raebel MA, Malone DC, Conner DA, Xu S, Porter JA, Lanty FA. Health services use and health care costs of obese and nonobese individuals. *Arch Intern Med.* 2004;164(19):2135-2140.
28. Fuentes AV, Pineda MD, Venkata KCN. Comprehension of top 200 prescribed drugs in the US as a resource for pharmacy teaching, training and practice. *Pharmacy (Basel).* 2018;6(2):E43.
29. Alswat KA. Gender disparities in osteoporosis. *Clin Med Res.* 2017;9(5): 382–387.



- 1
- 2
- 3 30. Li H, Li J. Thyroid disorders in women. *Minerva Med.* 2015;106(2):109-114.
- 4
- 5 31. Kirkman MS, Briscoe VJ, Clark N, et al. Diabetes in older adults. *Diabetes Care.*
- 6 2012;35(12):2650-2664.
- 7
- 8 32. Traves KP, Studdiford JS, Pickle S, Tully AS. Edema: diagnosis and management. *Am Fam*
- 9 10 11 12 13 14 15 16 17 18 19 20 21 22 23 24 25 26 27 28 29 30 31 32 33 34 35 36 37 38 39 40 41 42 43 44 45 46 47 48 49 50 51 52 53 54 55 56 57 58 59 60
33. Mc Donald Posso AJ, Motta Borrel JA, Fontes F, Cruz Gonzalez CE, Pachón Burgos AA, Cumbreira Ortega A. High blood pressure in Panama: Prevalence, sociodemographic and biologic profile, treatment, and control (STROBE). *Medicine (Baltimore).* 2014;93(22):e101.
34. Ferrara A, Barrett-Connor E, Shan J. Total, LDL, and HDL cholesterol decrease with age in older men and women. The Rancho Bernardo Study 1984-1994. *Circulation.* 1997;96(1):37-43.
35. Gesing A. The thyroid gland and the process of aging. *Thyroid Res.* 2015;8(Suppl 1):A8.
36. A L D'Souza. Ageing and the gut. *Postgrad Med J.* 2007; 83(975):44–53.
37. Ma Y, Yang Y, Wang F, et al. Obesity and risk of colorectal cancer: a systematic review of prospective studies. *PLoS One.* 2013;8(1):e53916.
38. Brown J, Wimpenny P, Maughan H. Skin problems in people with obesity. *Nurs Stand.* 2004;18(35):38-42.
39. Semins MJ, Shore AD, Makary MA, Weiner J, Matlaga BR. The impact of obesity on urinary tract infection risk. *Urology.* 2012;79(2):266-269.
40. Ruhl CE, Everhart JE. Overweight, but not high dietary fat intake, increases risk of gastroesophageal reflux disease hospitalization: the NHANES I Epidemiologic Followup

- 1  
2  
3 Study. First National Health and Nutrition Examination Survey. *Ann Epidemiol.*  
4  
5 1999;9(7):424-435.  
6  
7  
8 41. Anggiansah R, Sweis R, Anggiansah A, Wong T, Cooper D, Fox M. The effects of obesity  
9  
10 on oesophageal function, acid exposure and the symptoms of gastro-oesophageal reflux  
11  
12 disease. *Alim Pharmacol Ther.* 2013;37(5):555-563.  
13  
14  
15 42. Jacobson BC, Somers SC, Fuchs CS, Kelly CP, Camargo CA Jr. Association between body  
16  
17 mass index and gastroesophageal reflux symptoms in both normal weight and overweight  
18  
19 women. *N Engl J Med.* 2006;354(22):2340-2348.  
20  
21  
22 43. Talley NJ, Howell S, Poulton R. Obesity and chronic gastrointestinal tract symptoms in  
23  
24 young adults: a birth cohort study. *Am J Gastroenterol* 2004;99(9):1807-1814.  
25  
26  
27 44. Boylan MR, Khalili H, Huang ES, Chan AT. Measures of adiposity are associated with  
28  
29 increased risk of peptic ulcer. *Clin Gastroenterol Hepatol.* 2014 Oct;12(10):1688-1694.  
30  
31  
32 45. Kim J, Kim KH, Lee BJ. Association of peptic ulcer disease with obesity, nutritional  
33  
34 components, and blood parameters in the Korean population. *PLoS One.* 2017;12(8):  
35  
36 e0183777.  
37  
38 46. Xu M, Liu L, Yuan B, Yin J, Lu Q. Association of obesity with *Helicobacter pylori* infection:  
39  
40 A retrospective study. *World J Gastroenterol* 2017;23(15):2750-2756.  
41  
42  
43 47. Falagas ME, Kompoti M. Obesity and infection. *Lancet Infect Dis* 2006;6(7)438-446.  
44  
45  
46 48. Huttunen R, Syrjanen J. Obesity and the risk and outcome of infection. *Int J Obes.*  
47  
48 2013;37:333-340.  
49  
50 49. Lübbecke A, Zingg M, Hoffmeyer P, et al. Body mass and weight thresholds for increased  
51  
52 prosthetic joint infection rates after primary total joint arthroplasty. *Acta Orthopaedica.*  
53  
54 2016;87(2):132-138  
55  
56  
57  
58  
59  
60

- 1  
2  
3 50. Yang JH, Bhargava P, McCloskey D, Mao N, Palsson BO, Collins JJ. Antibiotic-induced  
4 changes to the host metabolic environment inhibit drug efficacy and alter immune function.  
5  
6 Cell Host & Microbe. 2017;22(6):757-765.  
7  
8  
9
- 10 51. Early G. Current Evidence regarding antibiotic exposure and childhood obesity: an  
11 integrative review. *Ped Nurs*. 2017;43(4):169-174.  
12  
13
- 14 52. Bandaru P, Rajkumar H, Napanveettil G. The impact of obesity on immune response to  
15 infection and vaccine: an insight into plausible mechanisms. *Endocrinol Metab Syndr*  
16  
17 2013;2:2.  
18  
19
- 20 53. Kwong JC, Campitelli MA, Rosella LC. Obesity and respiratory hospitalizations during  
21 influenza seasons in Ontario, Canada: a cohort study. *Clin Infect Dis*. 2011;53(5):413-421.  
22  
23
- 24 54. Wang Z, Nakayama T. Inflammation, a link between obesity and cardiovascular disease.  
25  
26 *Mediators Inflamm*. 2010;2010:535918.  
27  
28
- 29 55. Bastard JP, Maachi M, Lagathu C, Kim MJ, Caron M, Vidal H, Capeau J, Feve B. Recent  
30 advances in the relationship between obesity, inflammation, and insulin resistance. *Eur*  
31  
32 *Cytokine Netw*. 2006;17(1):4-12.  
33  
34
- 35 56. Ciprandi G, Pistorio A, Tosca M, Ferraro MR, Cirillo I. Body mass index, respiratory  
36 function and bronchial hyperactivity in allergic rhinitis and asthma. *Respir Med*  
37  
38 2009;103(2):289-295.  
39  
40
- 41 57. Gorgievska-Sukarovska B, Lipozencić J, Susac A. Obesity and allergic diseases. *Acta*  
42  
43 *Dermatovenerol Croat*. 2008;16(4):231-235.  
44  
45
- 46 58. Shah R, Yang Y. Health and economic burden of obesity in elderly individuals with asthma  
47  
48 in the United States. *Popul Health Manag* 2015;18(3):186-191.  
49  
50  
51  
52  
53  
54  
55  
56  
57  
58  
59  
60

- 1  
2  
3 59. Guo Y, Moon JY, Laurie CC, et al. Genetic Predisposition to Obesity is associated  
4 with Asthma in US Hispanics/Latinos: Results from the Hispanic Community Health  
5 Study/Study of Latinos. *Allergy*. 2018;doi: 10.1111/all.13450. [Epub ahead of print]  
6  
7  
8  
9  
10 60. Rodriguez D. Obesity and Asthma – What’s the Connection.  
11  
12 <https://www.everydayhealth.com/asthma/obesity-connection.aspx>. Published August 28,  
13 2013. Accessed April 12, 2018.  
14  
15  
16  
17 61. Greene, A.K., et al. Lower-Extremity Lymphedema and Elevated Body-Mass Index. *N Engl*  
18 *J Med*. 2012;366:2136-2137.  
19  
20  
21 62. Helyer, L.K., et al. Obesity is a risk factor for developing postoperative lymphedema in  
22 breast cancer patients. *Breast J*. 2012;16(1):48-54.  
23  
24  
25  
26 63. Greene AK, Grant FD, Slavin SA, Maclellan RA. Obesity-induced lymphedema: clinical and  
27 lymphoscintigraphic features. *Plast Reconstr Surg*. 2015;135(6):1715-1719.  
28  
29  
30  
31 64. King LK, March L, Anandacoomarasamy A. Obesity & osteoarthritis. *Indian J Med Res*.  
32 2013;138(2):185-193.  
33  
34  
35 65. Baodong Qin, Min Yang, Haitao Fu, et al. Body mass index and the risk of rheumatoid  
36 arthritis: a systematic review and dose-response meta-analysis. *Arthritis Res Ther*.  
37 2015;17(1):86.  
38  
39  
40  
41  
42 66. Feng J, Chen Q, Yu F, et al. Body mass index and risk of rheumatoid arthritis: a meta-  
43 analysis of observational studies. *Medicine*. 2016;95(8):e2859.  
44  
45  
46  
47 67. Albrecht K, Richter A, Callhoff J, et al. Body mass index distribution in rheumatoid arthritis:  
48 a collaborative analysis from three large German rheumatoid arthritis databases. *Arthritis Res*  
49 *Ther*. 2016;18:149.  
50  
51  
52  
53  
54  
55  
56  
57  
58  
59  
60

- 1  
2  
3 68. Rodriguez D. How Your Immune System Worsens Arthritis. EverydayHealth.com.  
4  
5 <https://www.everydayhealth.com/arthritis/understanding/the-immune-system.aspx>. Published  
6  
7 August 1, 2012. Accessed April 11, 2018.  
8  
9
- 10 69. Sheridan PA, Paich HA, Handy J, et al. Obesity is associated with impaired immune response  
11  
12 to influenza vaccination in humans. *Int J Obes*. 2012;36(8):1072-1077.  
13  
14
- 15 70. Painter SD, Ovsyannikova IG, Poland GA. The weight of obesity on the human immune  
16  
17 response to vaccination. *Vaccine*. 2015;33(36): 4422–4429.  
18  
19
- 20 71. Young KM, Gray CM, Bekker LG. Is Obesity a Risk Factor for Vaccine Non-  
21  
22 Responsiveness? *PLoS One*. 2013;8(12): e82779.  
23  
24
- 25 72. Okifuji A, Hare BD. The association between chronic pain and obesity. *J Pain Res*.  
26  
27 2015;8:399-408.  
28  
29
- 30 73. Erdmann J. Osteoarthritis and Obesity. [www.arthritis.org](http://www.arthritis.org). [https://www.arthritis.org/living-](https://www.arthritis.org/living-with-arthritis/comorbidities/obesity-arthritis/osteoarthritis-and-obesity.php)  
31  
32 [with-arthritis/comorbidities/obesity-arthritis/osteoarthritis-and-obesity.php](https://www.arthritis.org/living-with-arthritis/comorbidities/obesity-arthritis/osteoarthritis-and-obesity.php). Accessed April  
33  
34 11, 2018.  
35  
36
- 37 74. American Obesity Association. Health effects of obesity. AOA Fact Sheets. 2002.  
38
- 39 75. Tashani OA, Asitita R, Sharp D, Johnson MI. Body mass index and distribution of body fat  
40  
41 can influence sensory detection and pain sensitivity. *Eur J Pain* 2017;21(7):1186-1196.  
42  
43
- 44 76. Rathee N. Obesity and depression: Are they related? *Indian J Health Well*. 2017;8(12):1472-  
45  
46 1475.  
47
- 48 77. Zhao G, Ford ES, Dhingra S, Li C, Strine TW, Mokdad AH. Depression and anxiety among  
49  
50 US adults: associations with body mass index. *Int J Obesity*. 2009;33(2):257-266.  
51  
52  
53  
54  
55  
56  
57  
58  
59  
60

- 1  
2  
3 78. Onyike CU, Crum RM, Lee HB, Lyketsos DG, Eaton WW. Is obesity associated with major  
4 depression? Results from the Third National Health and Nutrition Examination Survey. *Am J*  
5  
6 *Epidemiol.* 2003;158(12):1139-1147.  
7  
8  
9  
10 79. Petry NM, Barry D, Pietrzak RH, Wagner JA. Overweight and obesity are associated with  
11  
12 psychiatric disorders: results from the National Epidemiologic Survey on Alcohol and  
13  
14 Related Conditions. *Psychosom Med.* 2008;70(3):288-297.  
15  
16  
17 80. Pratt LA, Brody DJ. Depression and obesity in the U.S. adult household population, 2005-  
18  
19 2010. NCHS Data Brief, No. 167, October 2014.  
20  
21  
22 81. McElroy SL, Kotwal R, Malhotra S, Nelson EB, Keck PE, Nemeroff CB. Are mood  
23  
24 disorders and obesity related? A review for the mental health professional. *J Clin Psychiatry*  
25  
26 2004;65(5):634-651.  
27  
28  
29 82. Ferraro KF, Su Y, Gretebeck RJ, Black DR, Badylak SF. Body mass index and disability in  
30  
31 adulthood: A 20-year panel study. *Am J Public Health.* 2002;92(5):834-840.  
32  
33  
34 83. Katon W, Ciechanowski P. Impact of major depression on chronic medical illness. *J*  
35  
36 *Psychosom Res.* 2002;53(4):859-863.  
37  
38  
39 84. Baltaci D, Kutlucan A, Turker Y, et al. Association of vitamin B12 with obesity, overweight,  
40  
41 insulin resistance and metabolic syndrome, and body fat composition; primary care-based  
42  
43 study. *Med Glas.* 2013;10(2):203-210.  
44  
45  
46 85. Pereira-Santos M, Costa PR, Assis AM, Santos CA, Santos DB. Obesity and vitamin D  
47  
48 deficiency: a systematic review and meta-analysis. *Obes Rev.* 2015;16(4):341-349.  
49  
50  
51 86. Black RE, Morris SS, Bryce J. Where and why are 10 million children dying every year? *The*  
52  
53 *Lancet* 2003;361:2226-2234.  
54  
55  
56  
57  
58  
59  
60

1  
2  
3 87. Merrill RM, Telford CT. Pharmaceutical use according to participation in worksite wellness  
4 screening and health campaigns. *Prev Med Rep* 2018;12:158-163.  
5  
6  
7

## 8 **Footnotes**

9

10  
11 Contributors: RMM conceived and designed the epidemiological study, contributed to  
12 acquisition of data, analyzed and interpreted the data, and drafted the manuscript. RPF  
13 interpreted the data, provided a literature review, and revised the manuscript. Both authors  
14 critically revised the manuscript for important intellectual content. The manuscript has been read  
15 and approved by both authors.  
16  
17  
18  
19  
20  
21  
22

23 Funding: The authors have not declared a specific grant for this research from any funding  
24 agency in the public, commercial or not-for-profit sectors.  
25  
26  
27

28 Competing interests: None declared.  
29  
30

31 Patient consent: Not required.  
32  
33

34 Ethics approval: Study approval was obtained from the institutional review board at Brigham  
35 Young University (IRB E1 5259).  
36  
37  
38

39 Provenance and peer review: Not commissioned; externally peer reviewed.  
40  
41

42 Data sharing statement: The data sets used and analyzed in the current study are available from  
43 the corresponding author on reasonable request at: [Ray\\_Merrill@byu.edu](mailto:Ray_Merrill@byu.edu)  
44  
45  
46  
47  
48  
49  
50  
51  
52  
53  
54  
55  
56  
57

Table 1 Characterization of the study group according to sex, age, medical and pharmacy costs

|                            | No.  | %     | Continuously Employed % | Chi-square p value | Risk Ratio | 95% CI    |
|----------------------------|------|-------|-------------------------|--------------------|------------|-----------|
| <b>Sex</b>                 |      |       |                         |                    |            |           |
| Men                        | 797  | 26.36 | 84.69                   | 0.3884             | 1.00       |           |
| Women                      | 2226 | 73.64 | 83.38                   |                    | 0.98       | 0.95-1.02 |
| <b>Age Group</b>           |      |       |                         |                    |            |           |
| 18-39                      | 770  | 25.47 | 82.21                   | < 0.0001           | 1.00       |           |
| 40-49                      | 806  | 26.66 | 89.45                   |                    | 1.09       | 1.05-1.13 |
| 50-59                      | 1088 | 35.99 | 88.24                   |                    | 1.07       | 1.03-1.12 |
| 60-76                      | 359  | 11.88 | 60.45                   |                    | 0.74       | 0.67-0.80 |
| <b>Medical Cost (USD)</b>  |      |       |                         |                    |            |           |
| 0-184                      | 755  | 25.0  | 87.55                   | < 0.0001           | 1.00       |           |
| 185-604                    | 757  | 25.0  | 85.07                   |                    | 0.97       | 0.93-1.01 |
| 605-2049                   | 755  | 25.0  | 84.64                   |                    | 0.97       | 0.93-1.01 |
| 2050-7191                  | 454  | 15.0  | 79.30                   |                    | 0.91       | 0.86-0.96 |
| 7192+                      | 302  | 10.0  | 75.17                   |                    | 0.86       | 0.80-0.92 |
| <b>Pharmacy Cost (USD)</b> |      |       |                         |                    |            |           |
| 0-6                        | 759  | 25.0  | 86.92                   | < 0.0001           | 1.00       |           |
| 7-194                      | 755  | 25.0  | 85.21                   |                    | 0.99       | 0.69-1.03 |
| 195-903                    | 755  | 25.0  | 82.59                   |                    | 0.96       | 0.92-1.00 |
| 904-2303                   | 452  | 15.0  | 84.14                   |                    | 0.99       | 0.94-1.04 |
| 2304+                      | 302  | 10.0  | 74.92                   |                    | 0.86       | 0.80-0.93 |

Sex, age, medical and pharmacy costs apply to the 2010-11 academic year.



Table 2 Medical and pharmacy costs according to sex, age, year, and body mass index

|                          | BMI (kg/m <sup>2</sup> ) |      |     | Medical Cost (USD) |       |     | Median | Median one-way analysis | Pharmacy Cost (USD) |      |      | Median | Median one-way analysis |
|--------------------------|--------------------------|------|-----|--------------------|-------|-----|--------|-------------------------|---------------------|------|------|--------|-------------------------|
|                          | Mean                     | SD   | SNK | Mean               | SD    | SNK |        | p value                 | Mean                | SD   | SNK  |        | p value                 |
| Sex                      |                          |      |     |                    |       |     |        |                         |                     |      |      |        |                         |
| Men                      | 29.35                    | 5.80 | A   | 2869               | 10581 | A   | 373    | < 0.0001                | 725                 | 2324 | A    | 53     | < 0.0001                |
| Women                    | 27.26                    | 6.47 | B   | 3447               | 12049 | A   | 741    |                         | 963                 | 3550 | B    | 238    |                         |
| Age Group                |                          |      |     |                    |       |     |        |                         |                     |      |      |        |                         |
| 18-39                    | 27.17                    | 6.06 | A   | 2236               | 9344  | A   | 389    | < 0.0001                | 660                 | 3342 | A    | 70     | < 0.0001                |
| 40-49                    | 27.76                    | 6.42 | B   | 3052               | 12366 | B   | 503    |                         | 750                 | 2806 | A    | 106    |                         |
| 50-59                    | 28.05                    | 6.55 | B   | 3935               | 12579 | B   | 845    |                         | 1021                | 3288 | B    | 261    |                         |
| 60-76                    | 28.17                    | 6.13 | B   | 3749               | 10831 | B   | 989    |                         | 1288                | 3990 | C    | 344    |                         |
| Year                     |                          |      |     |                    |       |     |        |                         |                     |      |      |        |                         |
| 2010-11                  | 27.89                    | 6.40 | A   | 3188               | 10524 | A   | 605    | 0.2313                  | 830                 | 2247 | A    | 195    | 0.0016                  |
| 2011-12                  | 27.79                    | 6.31 | A   | 3621               | 12816 | A   | 610    |                         | 953                 | 3180 | A    | 189    |                         |
| 2012-13                  | 27.87                    | 6.59 | A   | 3208               | 11836 | A   | 670    |                         | 934                 | 3571 | A    | 173    |                         |
| 2013-14                  | 27.63                    | 6.16 | A   | 3191               | 11557 | A   | 651    |                         | 894                 | 3913 | A    | 141    |                         |
| BMI (kg/m <sup>2</sup> ) |                          |      |     |                    |       |     |        |                         |                     |      |      |        |                         |
| Underweight              |                          |      |     | 2191               | 1190  | A   | 647    | 0.0003                  | 1454                | 6706 | A    | 224    | 0.0004                  |
| Normal weight            |                          |      |     | 2826               | 333   | A   | 650    |                         | 779                 | 3285 | B    | 167    |                         |
| Overweight               |                          |      |     | 3174               | 514   | A   | 603    |                         | 926                 | 3085 | A, B | 169    |                         |
| Obese                    |                          |      |     | 3544               | 459   | A   | 665    |                         | 1031                | 3458 | A, B | 228    |                         |
| Morbidly obese           |                          |      |     | 6911               | 2092  | B   | 1033   |                         | 853                 | 1493 | A, B | 242    |                         |

SNK: Student-Newman-Keuls Test. Different letters indicate significant difference at the 0.05 level.

Table 3 Risk of medical and pharmacy costs (USD) above the 50<sup>th</sup>, 75<sup>th</sup>, and 90<sup>th</sup> percentiles according to BMI weight classification, sex, and age

|                          | Medical                                        |           |                                                |           |                                                |           | Pharmacy                                       |           |                                                |           |                                                |           |
|--------------------------|------------------------------------------------|-----------|------------------------------------------------|-----------|------------------------------------------------|-----------|------------------------------------------------|-----------|------------------------------------------------|-----------|------------------------------------------------|-----------|
|                          | 50 <sup>th</sup> percentile<br>Above vs. below |           | 75 <sup>th</sup> percentile<br>Above vs. below |           | 90 <sup>th</sup> percentile<br>Above vs. below |           | 50 <sup>th</sup> percentile<br>Above vs. below |           | 75 <sup>th</sup> percentile<br>Above vs. below |           | 90 <sup>th</sup> percentile<br>Above vs. below |           |
|                          | Risk Ratio                                     | 95% CI    |
| Sex                      |                                                |           |                                                |           |                                                |           |                                                |           |                                                |           |                                                |           |
| Men                      | 1.00                                           |           | 1.00                                           |           | 1.00                                           |           | 1.00                                           |           | 1.00                                           |           | 1.00                                           |           |
| Women                    | 1.43                                           | 1.36-1.51 | 1.47                                           | 1.35-1.60 | 1.42                                           | 1.24-1.64 | 1.58                                           | 1.50-1.66 | 1.59                                           | 1.46-1.74 | 1.14                                           | 1.00-1.29 |
| Age Groups               |                                                |           |                                                |           |                                                |           |                                                |           |                                                |           |                                                |           |
| 18-39                    | 1.00                                           |           | 1.00                                           |           | 1.00                                           |           | 1.00                                           |           | 1.00                                           |           | 1.00                                           |           |
| 40-49                    | 1.16                                           | 1.08-1.23 | 1.15                                           | 1.03-1.29 | 1.08                                           | 0.90-1.28 | 1.14                                           | 1.07-1.22 | 1.45                                           | 1.29-1.64 | 1.72                                           | 1.37-2.15 |
| 50-59                    | 1.50                                           | 1.42-1.59 | 1.65                                           | 1.50-1.82 | 1.36                                           | 1.16-1.58 | 1.48                                           | 1.39-1.56 | 2.28                                           | 2.05-2.55 | 2.82                                           | 2.30-3.46 |
| 60+                      | 1.61                                           | 1.52-1.72 | 1.83                                           | 1.64-2.04 | 1.33                                           | 1.11-1.60 | 1.57                                           | 1.48-1.68 | 2.57                                           | 2.29-2.89 | 3.78                                           | 3.06-4.68 |
| BMI (kg/m <sup>2</sup> ) |                                                |           |                                                |           |                                                |           |                                                |           |                                                |           |                                                |           |
| Underweight              | 1.05                                           | 0.88-1.26 | 0.91                                           | 0.64-1.31 | 0.61                                           | 0.28-1.35 | 2.05                                           | 1.25-3.34 | 1.05                                           | 0.74-1.48 | 2.05                                           | 1.25-3.34 |
| Normal weight            | 1.00                                           |           | 1.00                                           |           | 1.00                                           |           | 1.00                                           |           | 1.00                                           |           | 1.00                                           |           |
| Overweight               | 0.95                                           | 0.90-1.00 | 0.95                                           | 0.86-1.05 | 1.01                                           | 0.85-1.20 | 1.01                                           | 0.95-1.06 | 1.18                                           | 1.07-1.30 | 1.68                                           | 1.41-2.00 |
| Obese                    | 1.00                                           | 0.95-1.06 | 1.14                                           | 1.03-1.25 | 1.21                                           | 1.01-1.43 | 1.11                                           | 1.05-1.17 | 1.19                                           | 1.08-1.31 | 1.76                                           | 1.47-2.12 |
| Morbidly obese           | 1.18                                           | 1.08-1.29 | 1.62                                           | 1.40-1.87 | 2.18                                           | 1.72-2.77 | 1.13                                           | 1.03-1.25 | 1.30                                           | 1.09-1.55 | 1.93                                           | 1.43-2.61 |

Shaded cells represent statistical significance at the 0.05 level.

Table 4 Medication use according to sex, age, and BMI weight classification

|                     |       | Sex   |       | Age Group |       |       |       | Body Mass Index (kg/m <sup>2</sup> ) |               |             |       |                |
|---------------------|-------|-------|-------|-----------|-------|-------|-------|--------------------------------------|---------------|-------------|-------|----------------|
|                     |       | Men   | Women | 18-39     | 40-49 | 50-59 | 60+   | Underweight                          | Normal weight | Over weight | Obese | Morbidly obese |
| Medication          | %     |       |       |           |       |       |       |                                      |               |             |       |                |
| Acid Reflux         | 5.75  | 5.56  | 5.81  | 3.02      | 4.54  | 7.14  | 8.36  | 3.57                                 | 4.34          | 5.36        | 7.19  | 9.14           |
| Risk ratio          |       | 1.00  | 1.04  | 1.00      | 1.50  | 2.36  | 2.77  | 0.82                                 | 1.00          | 1.24        | 1.66  | 2.11           |
| AF <sub>p</sub> (%) |       | 0.00  | 0.26  | 0.00      | 2.81  | 7.27  | 9.23  |                                      | 0.00          | 1.33        | 3.64  | 5.98           |
| Acne                | 7.17  | 3.15  | 8.62  | 7.15      | 7.03  | 7.16  | 7.40  | 9.82                                 | 8.81          | 6.64        | 6.34  | 6.18           |
| Risk ratio          |       | 1.00  | 2.74  | 1.00      | 0.98  | 1.00  | 1.03  | 1.11                                 | 1.00          | 0.75        | 0.72  | 0.70           |
| AF <sub>p</sub> (%) |       | 0.00  | 11.07 | 0.00      | 0.01  | 0.25  | 0.25  | 0.82                                 | 0.00          |             |       |                |
| Antibiotic          | 21.21 | 17.81 | 22.44 | 18.72     | 20.76 | 22.76 | 21.93 | 25.89                                | 20.54         | 20.74       | 23.73 | 21.24          |
| Risk ratio          |       | 1.00  | 1.26  | 1.00      | 1.11  | 1.22  | 1.17  | 1.26                                 | 1.00          | 1.01        | 1.16  | 1.03           |
| AF <sub>p</sub> (%) |       | 0.00  | 5.23  | 0.00      | 2.26  | 4.38  | 3.51  | 5.24                                 | 0.00          | 0.21        | 3.19  | 0.72           |
| Anticonvulsants     | 1.49  | 1.39  | 1.53  | 1.84      | 1.32  | 1.45  | 1.40  | 2.68                                 | 1.25          | 1.13        | 1.65  | 1.61           |
| Risk ratio          |       | 1.00  | 1.10  | 1.00      | 0.72  | 0.79  | 0.76  | 2.14                                 | 1.00          | 0.90        | 1.32  | 1.29           |
| AF <sub>p</sub> (%) |       | 0.00  | 0.15  | 0.00      |       |       |       | 1.68                                 | 0.00          |             | 0.47  | 0.43           |
| Antifungal          | 5.29  | 2.61  | 5.81  | 5.64      | 6.03  | 4.24  | 3.87  | 5.36                                 | 5.83          | 3.81        | 6.24  | 6.18           |
| Risk ratio          |       | 1.00  | 2.23  | 1.00      | 1.07  | 0.75  | 0.69  | 0.92                                 | 1.00          | 0.65        | 1.07  | 1.06           |
| AF <sub>p</sub> (%) |       | 0.00  | 6.09  | 0.00      | 0.36  |       |       |                                      | 0.00          |             | 0.37  | 0.32           |
| Anxiety             | 7.88  | 6.31  | 8.45  | 6.42      | 7.80  | 8.36  | 8.97  | 8.93                                 | 7.22          | 7.11        | 7.29  | 6.45           |
| Risk ratio          |       | 1.00  | 1.34  | 1.00      | 1.21  | 1.30  | 1.40  | 1.24                                 | 1.00          | 0.98        | 1.01  | 0.89           |
| AF <sub>p</sub> (%) |       | 0.00  | 2.60  | 0.00      | 1.67  | 2.33  | 3.03  | 1.83                                 | 0.00          |             | 0.08  |                |
| Arthritis           | 11.06 | 11.13 | 11.03 | 7.72      | 10.53 | 12.83 | 12.56 | 7.14                                 | 9.36          | 10.72       | 13.84 | 14.78          |
| Risk ratio          |       | 1.00  | 0.99  | 1.00      | 1.36  | 1.66  | 1.63  | 0.76                                 | 1.00          | 1.15        | 1.48  | 1.58           |
| AF <sub>p</sub> (%) |       | 0.00  |       | 0.00      | 3.87  | 6.82  | 6.48  |                                      | 0.00          | 1.58        | 5.03  | 6.02           |
| Asthma              | 8.61  | 7.19  | 9.13  | 7.48      | 8.80  | 8.00  | 11.22 | 6.25                                 | 6.24          | 8.74        | 10.39 | 10.75          |

1  
2  
3  
4  
5  
6  
7  
8  
9  
10  
11  
12  
13  
14  
15  
16  
17  
18  
19  
20  
21  
22  
23  
24  
25  
26  
27  
28  
29  
30  
31  
32  
33  
34  
35  
36  
37  
38  
39  
40  
41  
42  
43  
44  
45  
46  
47

|                        |       |       |       |       |       |       |       |       |       |       |       |       |
|------------------------|-------|-------|-------|-------|-------|-------|-------|-------|-------|-------|-------|-------|
| Risk ratio             |       | 1.00  | 1.27  | 1.00  | 1.18  | 1.07  | 1.50  | 1.00  | 1.00  | 1.40  | 1.67  | 1.72  |
| AF <sub>p</sub> (%)    |       | 0.00  | 2.27  | 0.00  | 1.50  | 0.59  | 4.13  | 0.01  | 0.00  | 3.33  | 5.42  | 5.86  |
| Birth Control          | 8.71  | 0.24  | 10.88 | 21.13 | 8.77  | 2.59  | 0.95  | 10.71 | 11.69 | 7.30  | 6.34  | 6.99  |
| Risk ratio             |       | 1.00  | 45.33 | 1.00  | 0.42  | 0.12  | 0.04  | 0.92  | 1.00  | 0.62  | 0.54  | 0.60  |
| AF <sub>p</sub> (%)    |       | 0.00  | 79.43 | 0.00  |       |       |       |       | 0.00  |       |       |       |
| Bowel/Rectum           | 3.06  | 2.75  | 3.17  | 1.76  | 2.84  | 3.53  | 4.15  | 1.79  | 3.15  | 2.87  | 2.85  | 2.96  |
| Risk ratio             |       | 1.00  | 1.15  | 1.00  | 1.61  | 2.01  | 2.36  | 0.57  | 1.00  | 0.91  | 0.90  | 0.94  |
| AF <sub>p</sub> (%)    |       | 0.00  | 0.47  | 0.00  | 1.84  | 2.99  | 3.99  |       | 0.00  |       |       |       |
| Cold/Influenza/Allergy | 17.80 | 14.52 | 18.99 | 15.73 | 18.30 | 18.14 | 19.07 | 22.32 | 15.53 | 18.56 | 20.38 | 22.04 |
| Risk ratio             |       | 1.00  | 1.31  | 1.00  | 1.16  | 1.15  | 1.21  | 1.44  | 1.00  | 1.20  | 1.31  | 1.42  |
| AF <sub>p</sub> (%)    |       | 0.00  | 5.20  | 0.00  | 2.83  | 2.65  | 3.64  | 7.22  | 0.00  | 3.36  | 5.27  | 6.94  |
| Depression             | 18.24 | 10.28 | 21.14 | 12.51 | 19.30 | 20.75 | 18.84 | 15.18 | 16.20 | 17.59 | 20.83 | 18.55 |
| Risk ratio             |       | 1.00  | 2.06  | 1.00  | 1.54  | 1.66  | 1.51  | 0.94  | 1.00  | 1.09  | 1.29  | 1.15  |
| AF <sub>p</sub> (%)    |       | 0.00  | 16.16 | 0.00  | 9.01  | 10.73 | 8.45  |       | 0.00  | 1.54  | 4.95  | 2.58  |
| Diabetes               | 6.32  | 6.48  | 6.22  | 2.53  | 4.50  | 7.82  | 10.94 | 1.79  | 2.24  | 5.67  | 11.29 | 17.74 |
| Risk ratio             |       | 1.00  | 0.96  | 1.00  | 1.78  | 3.09  | 4.32  | 0.80  | 1.00  | 2.53  | 5.04  | 7.92  |
| AF <sub>p</sub> (%)    |       | 0.00  |       | 0.00  | 4.69  | 11.67 | 17.36 |       | 0.00  | 8.82  | 20.34 | 30.43 |
| Edema                  | 5.14  | 3.12  | 5.87  | 2.04  | 3.64  | 6.48  | 8.86  | 6.25  | 3.08  | 4.66  | 7.29  | 12.90 |
| Risk ratio             |       | 1.00  | 1.88  | 1.00  | 1.78  | 3.18  | 4.34  | 2.03  | 1.00  | 1.51  | 2.37  | 4.19  |
| AF <sub>p</sub> (%)    |       | 0.00  | 4.33  | 0.00  | 3.88  | 10.06 | 14.66 | 5.02  | 0.00  | 2.57  | 6.56  | 14.08 |
| Eye Infection          | 12.01 | 9.23  | 12.87 | 11.44 | 13.06 | 11.13 | 12.34 | 14.29 | 11.02 | 12.12 | 13.64 | 9.68  |
| Risk ratio             |       | 1.00  | 1.39  | 1.00  | 1.14  | 0.97  | 1.08  | 1.30  | 1.00  | 1.10  | 1.24  | 0.88  |
| AF <sub>p</sub> (%)    |       | 0.00  | 4.52  | 0.00  | 1.67  |       | 0.94  | 3.44  | 0.00  | 1.18  | 2.78  |       |
| Herpes                 | 6.30  | 3.26  | 6.86  | 4.82  | 7.24  | 6.12  | 4.71  | 1.79  | 7.66  | 7.22  | 4.20  | 1.88  |
| Risk ratio             |       | 1.00  | 2.10  | 1.00  | 1.50  | 1.27  | 0.98  | 0.23  | 1.00  | 0.94  | 0.55  | 0.25  |
| AF <sub>p</sub> (%)    |       | 0.00  | 6.50  | 0.00  | 3.07  | 1.67  |       |       | 0.00  |       |       |       |
| High Blood Pressure    | 16.49 | 19.95 | 15.60 | 4.58  | 11.05 | 22.78 | 29.39 | 6.25  | 8.54  | 17.44 | 24.68 | 31.99 |
| Risk ratio             |       | 1.00  | 0.78  | 1.00  | 2.41  | 4.97  | 6.42  | 0.73  | 1.00  | 2.04  | 2.89  | 3.75  |
| AF <sub>p</sub> (%)    |       | 0.00  |       | 0.00  | 18.89 | 39.59 | 47.18 |       | 0.00  | 14.66 | 23.76 | 31.17 |
| Inflammation           | 1.19  | 0.68  | 1.37  | 0.69  | 0.87  | 1.50  | 1.68  | 1.79  | 0.98  | 1.40  | 0.80  | 1.61  |
| Risk ratio             |       | 1.00  | 2.01  | 1.00  | 1.26  | 2.17  | 2.43  | 1.83  | 1.00  | 1.43  | 0.82  | 1.64  |
| AF <sub>p</sub> (%)    |       | 0.00  | 1.19  | 0.00  | 0.31  | 1.38  | 1.68  | 0.97  | 0.00  | 0.51  |       | 0.76  |

|                     |       |       |       |       |       |       |       |       |       |       |       |       |
|---------------------|-------|-------|-------|-------|-------|-------|-------|-------|-------|-------|-------|-------|
| Insomnia            | 4.23  | 2.24  | 4.95  | 2.70  | 3.60  | 5.72  | 4.04  | 8.93  | 4.07  | 3.92  | 3.85  | 4.84  |
| Risk ratio          |       | 1.00  | 2.21  | 1.00  | 1.33  | 2.12  | 1.50  | 2.19  | 1.00  | 0.96  | 0.95  | 1.19  |
| AF <sub>p</sub> (%) |       | 0.00  | 4.87  | 0.00  | 1.39  | 4.52  | 2.06  | 4.81  | 0.00  |       |       | 0.79  |
| Muscle Spasms       | 4.34  | 3.53  | 4.64  | 3.11  | 4.57  | 4.93  | 4.37  | 5.36  | 3.29  | 4.27  | 5.44  | 6.99  |
| Risk ratio          |       | 1.00  | 1.31  | 1.00  | 1.47  | 1.59  | 1.41  | 1.63  | 1.00  | 1.30  | 1.65  | 2.12  |
| AF <sub>p</sub> (%) |       | 0.00  | 1.35  | 0.00  | 2.00  | 2.48  | 1.73  | 2.66  | 0.00  | 1.28  | 2.76  | 4.65  |
| Nausea/Vomiting     | 5.01  | 3.77  | 5.47  | 5.44  | 4.85  | 4.83  | 5.10  | 4.46  | 4.14  | 4.50  | 6.19  | 5.65  |
| Risk ratio          |       | 1.00  | 1.45  | 1.00  | 0.89  | 0.89  | 0.94  | 1.08  | 1.00  | 1.09  | 1.50  | 1.36  |
| AF <sub>p</sub> (%) |       | 0.00  | 2.21  | 0.00  |       |       |       | 0.39  | 0.00  | 0.43  | 2.42  | 1.79  |
| Opioids             | 17.04 | 15.98 | 17.42 | 14.14 | 16.29 | 18.62 | 18.73 | 17.86 | 13.39 | 15.77 | 20.28 | 27.69 |
| Risk ratio          |       | 1.00  | 1.09  | 1.00  | 1.15  | 1.32  | 1.32  | 1.33  | 1.00  | 1.18  | 1.51  | 2.07  |
| AF <sub>p</sub> (%) |       | 0.00  | 1.51  | 0.00  | 2.53  | 5.12  | 5.24  | 5.38  | 0.00  | 2.94  | 8.06  | 15.40 |
| Osteoporosis        | 1.21  | 0.07  | 1.63  | 0.00  | 0.17  | 1.30  | 4.37  | 0.89  | 1.56  | 1.20  | 0.85  | 0.00  |
| Risk ratio          |       | 1.00  | 23.29 | 1.00  |       |       |       | 0.57  | 1.00  | 0.77  | 0.54  | 0.00  |
| AF <sub>p</sub> (%) |       | 0.00  | 21.24 | 0.00  |       |       |       |       | 0.00  |       |       |       |
| Pain – non opioid   | 2.19  | 1.63  | 2.39  | 2.78  | 2.15  | 1.98  | 1.91  | 3.57  | 1.73  | 1.67  | 2.55  | 2.96  |
| Risk ratio          |       | 1.00  | 1.47  | 1.00  | 0.77  | 0.71  | 0.69  | 2.06  | 1.00  | 0.97  | 1.47  | 1.71  |
| AF <sub>p</sub> (%) |       | 0.00  | 1.01  | 0.00  |       |       |       | 2.28  | 0.00  |       | 1.03  | 1.53  |
| Skin                | 6.84  | 4.88  | 7.55  | 5.44  | 6.44  | 7.37  | 8.24  | 6.25  | 7.25  | 6.41  | 7.19  | 5.38  |
| Risk ratio          |       | 1.00  | 1.55  | 1.00  | 1.18  | 1.35  | 1.51  | 0.86  | 1.00  | 0.88  | 0.99  | 0.74  |
| AF <sub>p</sub> (%) |       | 0.00  | 3.61  | 0.00  | 1.24  | 2.37  | 3.40  |       | 0.00  |       |       |       |
| Statins             | 12.05 | 15.91 | 10.65 | 1.76  | 7.07  | 16.46 | 24.51 | 2.68  | 5.59  | 15.15 | 17.18 | 21.77 |
| Risk ratio          |       | 1.00  | 0.67  | 1.00  | 4.02  | 9.35  | 13.93 | 0.48  | 1.00  | 2.71  | 3.07  | 3.89  |
| AF <sub>p</sub> (%) |       | 0.00  |       | 0.00  | 26.66 | 50.16 | 60.90 |       | 0.00  | 17.09 | 19.99 | 25.86 |
| Stomach Acid        | 1.19  | 1.49  | 1.07  | 0.86  | 1.25  | 0.99  | 1.96  | 0.89  | 0.81  | 1.01  | 1.90  | 1.08  |
| Risk ratio          |       | 1.00  | 0.72  | 1.00  | 1.45  | 1.15  | 2.28  | 1.10  | 1.00  | 1.25  | 2.35  | 1.33  |
| AF <sub>p</sub> (%) |       | 0.00  |       | 0.00  | 0.54  | 0.18  | 1.50  | 0.12  | 0.00  | 0.29  | 1.58  | 0.40  |
| Teeth/Gums          | 0.43  | 0.37  | 0.46  | 0.37  | 0.35  | 0.43  | 0.67  | 0.00  | 0.27  | 0.43  | 0.35  | 0.27  |
| Risk ratio          |       | 1.00  | 1.24  | 1.00  | 0.95  | 1.16  | 1.81  | 0.00  | 1.00  | 1.59  | 1.30  | 1.00  |
| AF <sub>p</sub> (%) |       | 0.00  | 0.10  | 0.00  |       | 0.07  | 0.35  |       | 0.00  | 0.25  | 0.13  | 0.00  |
| Thyroid             | 12.76 | 2.99  | 16.31 | 4.37  | 11.19 | 16.92 | 17.61 | 6.25  | 13.97 | 12.74 | 13.94 | 19.09 |
| Risk ratio          |       | 1.00  | 5.45  | 1.00  | 2.56  | 3.87  | 4.03  | 0.45  | 1.00  | 0.91  | 1.00  | 1.37  |

|                         |       |       |       |       |       |       |       |       |       |       |       |       |
|-------------------------|-------|-------|-------|-------|-------|-------|-------|-------|-------|-------|-------|-------|
| AF <sub>p</sub> (%)     |       | 0.00  | 36.24 | 0.00  | 16.61 | 26.82 | 27.88 |       | 0.00  |       |       | 4.47  |
| Ulcers                  | 9.38  | 8.55  | 9.69  | 8.30  | 8.28  | 10.19 | 10.88 | 10.71 | 7.59  | 9.90  | 10.99 | 15.32 |
| Risk ratio              |       | 1.00  | 1.13  | 1.00  | 1.00  | 1.23  | 1.31  | 1.41  | 1.00  | 1.30  | 1.45  | 2.02  |
| AF <sub>p</sub> (%)     |       | 0.00  | 1.24  | 0.00  |       | 2.09  | 2.83  | 3.71  | 0.00  | 2.78  | 4.03  | 8.72  |
| Urinary Tract Infection | 3.01  | 0.20  | 4.44  | 3.39  | 3.08  | 3.45  | 3.25  | 6.25  | 3.83  | 2.83  | 3.50  | 3.76  |
| Risk ratio              |       | 1.00  | 22.20 | 1.00  | 0.91  | 1.02  | 0.96  | 1.63  | 1.00  | 0.74  | 0.91  | 0.98  |
| AF <sub>p</sub> (%)     |       | 0.00  | 38.95 | 0.00  |       | 0.05  |       | 1.87  | 0.00  |       |       |       |
| Vitamins/Minerals       | 2.07  | 0.71  | 2.57  | 2.49  | 1.73  | 1.88  | 2.47  | 0.00  | 2.07  | 1.28  | 1.75  | 5.38  |
| Risk ratio              |       | 1.00  | 3.62  | 1.00  | 0.69  | 0.76  | 0.99  | 0.00  | 1.00  | 0.62  | 0.85  | 2.60  |
| AF <sub>p</sub> (%)     |       | 0.00  | 5.14  | 0.00  |       |       |       |       | 0.00  |       |       | 3.20  |
| All prescriptions       | 80.87 | 71.40 | 84.32 | 71.52 | 78.45 | 85.24 | 88.00 | 83.93 | 81.46 | 81.28 | 83.47 | 86.29 |
| Risk ratio              |       | 1.00  | 1.18  | 1.00  | 1.10  | 1.19  | 1.23  | 1.03  | 1.00  | 1.00  | 1.02  | 1.06  |
| AF <sub>p</sub> (%)     |       | 0.00  | 12.77 | 0.00  | 7.27  | 13.43 | 15.71 | 2.39  | 0.00  |       | 1.96  | 4.58  |

AF<sub>p</sub>: Attributable fraction in the population. Shaded cells represent statistical significance at the 0.05 level. Cells that are left blank had a negative AF<sub>p</sub>. In these cases the preventive fraction ( $[\text{Risk Ratio} - 1] \times 100$ ) is more appropriate.

Review only

1  
2  
3 Figure 1. Median medical and pharmacy cost (USD) according to Body Mass Index weight  
4 classifications and age  
5  
6  
7  
8  
9  
10  
11  
12  
13  
14  
15  
16  
17  
18  
19  
20  
21  
22  
23  
24  
25  
26  
27  
28  
29  
30  
31  
32  
33  
34  
35  
36  
37  
38  
39  
40  
41  
42  
43  
44  
45  
46  
47  
48  
49  
50  
51  
52  
53  
54  
55  
56  
57  
58  
59  
60

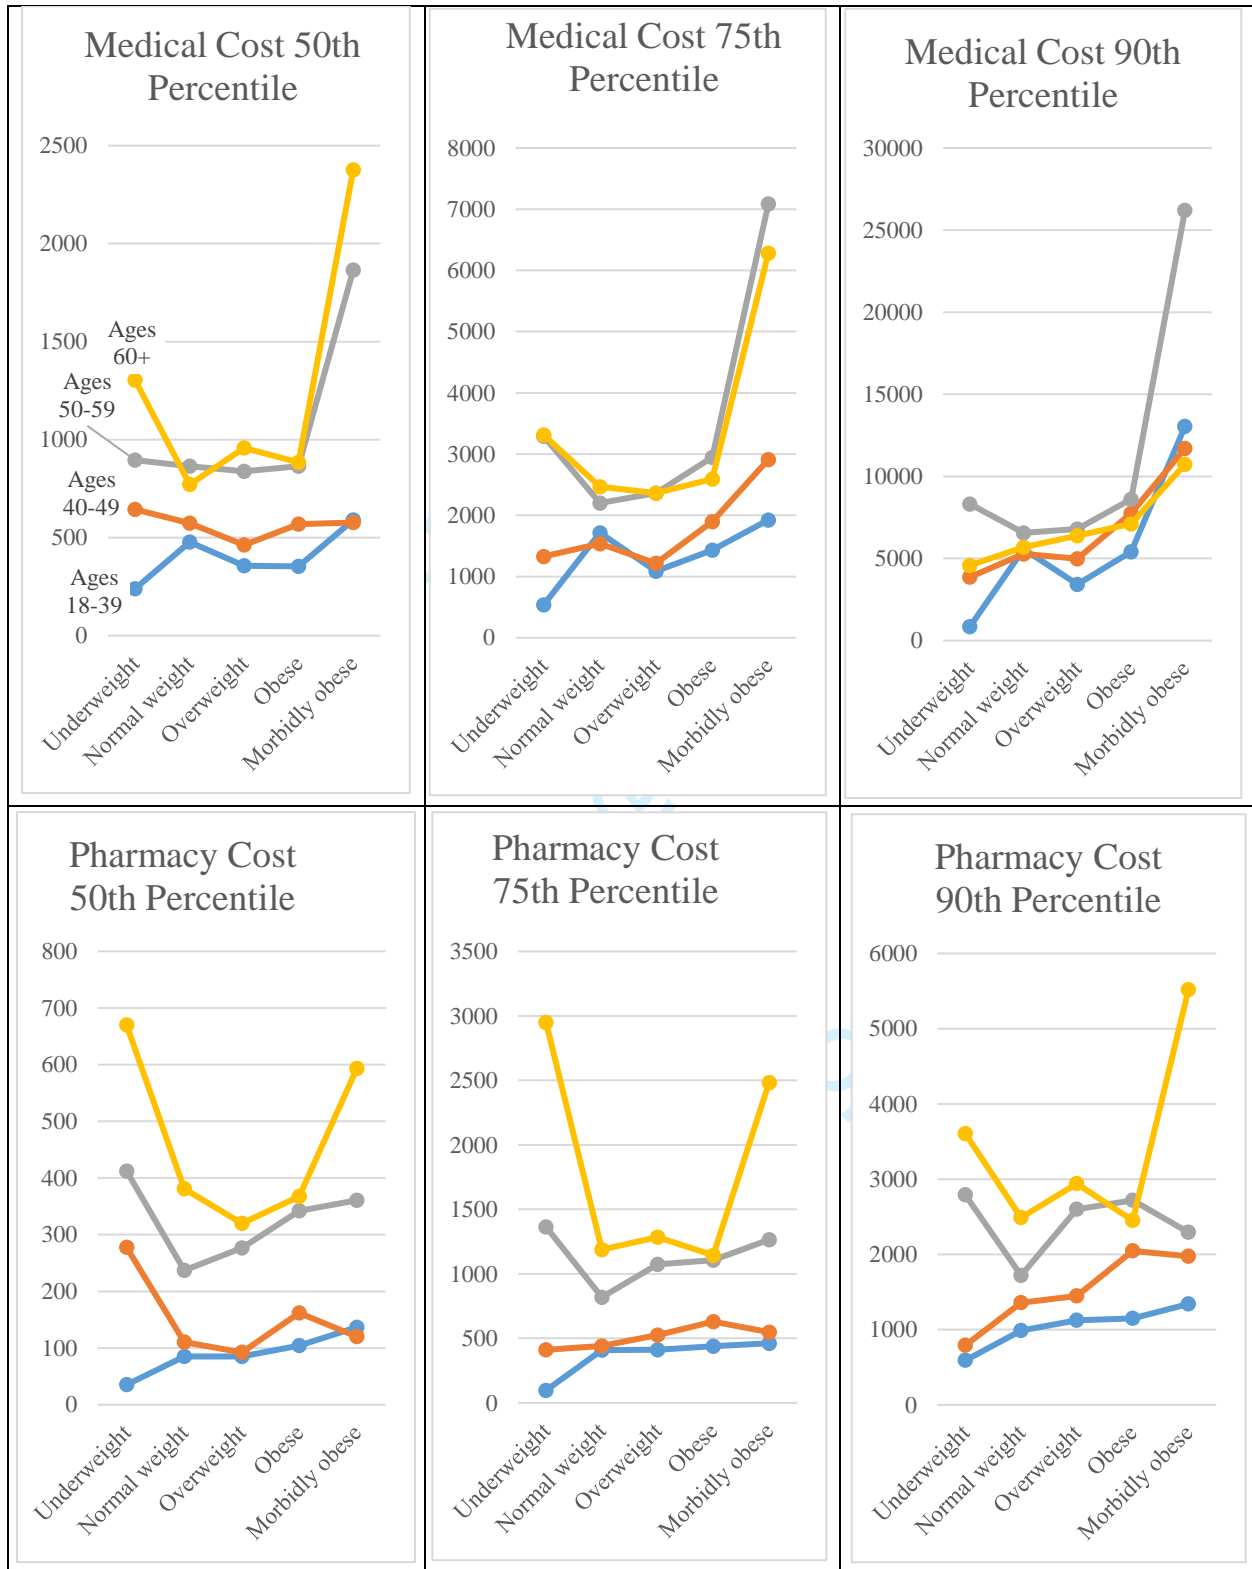



STROBE Statement—Checklist of items that should be included in reports of *cohort studies*

|                           | Item No | Recommendation                                                                                                                                                                                    | Page/line numbers |
|---------------------------|---------|---------------------------------------------------------------------------------------------------------------------------------------------------------------------------------------------------|-------------------|
| <b>Title and abstract</b> | 1       | (a) Indicate the study's design with a commonly used term in the title or the abstract                                                                                                            | 1/6, 2/25         |
|                           |         | (b) Provide in the abstract an informative and balanced summary of what was done and what was found                                                                                               | Done              |
| <b>Introduction</b>       |         |                                                                                                                                                                                                   |                   |
| Background/rationale      | 2       | Explain the scientific background and rationale for the investigation being reported                                                                                                              | Done              |
| Objectives                | 3       | State specific objectives, including any prespecified hypotheses                                                                                                                                  | Done              |
| <b>Methods</b>            |         |                                                                                                                                                                                                   |                   |
| Study design              | 4       | Present key elements of study design early in the paper                                                                                                                                           | Done              |
| Setting                   | 5       | Describe the setting, locations, and relevant dates, including periods of recruitment, exposure, follow-up, and data collection                                                                   | Done              |
| Participants              | 6       | (a) Give the eligibility criteria, and the sources and methods of selection of participants. Describe methods of follow-up                                                                        | Done              |
|                           |         | (b) For matched studies, give matching criteria and number of exposed and unexposed                                                                                                               | NA                |
| Variables                 | 7       | Clearly define all outcomes, exposures, predictors, potential confounders, and effect modifiers. Give diagnostic criteria, if applicable                                                          | Done              |
| Data sources/measurement  | 8*      | For each variable of interest, give sources of data and details of methods of assessment (measurement). Describe comparability of assessment methods if there is more than one group              | Done              |
| Bias                      | 9       | Describe any efforts to address potential sources of bias                                                                                                                                         | Done              |
| Study size                | 10      | Explain how the study size was arrived at                                                                                                                                                         | Done              |
| Quantitative variables    | 11      | Explain how quantitative variables were handled in the analyses. If applicable, describe which groupings were chosen and why                                                                      | Done              |
| Statistical methods       | 12      | (a) Describe all statistical methods, including those used to control for confounding                                                                                                             | Done              |
|                           |         | (b) Describe any methods used to examine subgroups and interactions                                                                                                                               | NA                |
|                           |         | (c) Explain how missing data were addressed                                                                                                                                                       | NA                |
|                           |         | (d) If applicable, explain how loss to follow-up was addressed                                                                                                                                    | NA                |
|                           |         | (e) Describe any sensitivity analyses                                                                                                                                                             | NA                |
| <b>Results</b>            |         |                                                                                                                                                                                                   |                   |
| Participants              | 13*     | (a) Report numbers of individuals at each stage of study—eg numbers potentially eligible, examined for eligibility, confirmed eligible, included in the study, completing follow-up, and analysed | Done              |
|                           |         | (b) Give reasons for non-participation at each stage                                                                                                                                              | NA                |
|                           |         | (c) Consider use of a flow diagram                                                                                                                                                                | NA                |
| Descriptive data          | 14*     | (a) Give characteristics of study participants (eg demographic, clinical, social) and information on exposures and potential confounders                                                          | Done              |
|                           |         | (b) Indicate number of participants with missing data for each variable of interest                                                                                                               | Done              |
|                           |         | (c) Summarise follow-up time (eg, average and total amount)                                                                                                                                       | Done              |
| Outcome data              | 15*     | Report numbers of outcome events or summary measures over time                                                                                                                                    | Done              |
| Main results              | 16      | (a) Give unadjusted estimates and, if applicable, confounder-adjusted estimates and their precision (eg, 95% confidence interval). Make clear                                                     | Done              |

|                          |    |                                                                                                                                                                            |      |
|--------------------------|----|----------------------------------------------------------------------------------------------------------------------------------------------------------------------------|------|
|                          |    | which confounders were adjusted for and why they were included                                                                                                             |      |
|                          |    | (b) Report category boundaries when continuous variables were categorized                                                                                                  | NA   |
|                          |    | (c) If relevant, consider translating estimates of relative risk into absolute risk for a meaningful time period                                                           | NA   |
| Other analyses           | 17 | Report other analyses done—eg analyses of subgroups and interactions, and sensitivity analyses                                                                             | Done |
| <b>Discussion</b>        |    |                                                                                                                                                                            |      |
| Key results              | 18 | Summarise key results with reference to study objectives                                                                                                                   | Done |
| Limitations              | 19 | Discuss limitations of the study, taking into account sources of potential bias or imprecision. Discuss both direction and magnitude of any potential bias                 | Done |
| Interpretation           | 20 | Give a cautious overall interpretation of results considering objectives, limitations, multiplicity of analyses, results from similar studies, and other relevant evidence | Done |
| Generalisability         | 21 | Discuss the generalisability (external validity) of the study results                                                                                                      | Done |
| <b>Other information</b> |    |                                                                                                                                                                            |      |
| Funding                  | 22 | Give the source of funding and the role of the funders for the present study and, if applicable, for the original study on which the present article is based              | Done |

\*Give information separately for exposed and unexposed groups.

**Note:** An Explanation and Elaboration article discusses each checklist item and gives methodological background and published examples of transparent reporting. The STROBE checklist is best used in conjunction with this article (freely available on the Web sites of PLoS Medicine at <http://www.plosmedicine.org/>, Annals of Internal Medicine at <http://www.annals.org/>, and Epidemiology at <http://www.epidem.com/>). Information on the STROBE Initiative is available at <http://www.strobe-statement.org>.

# BMJ Open

## To what extent does sex, age, and BMI impact medical and pharmacy costs? A retrospective cohort study involving employees in a large school district

|                                 |                                                                                                                |
|---------------------------------|----------------------------------------------------------------------------------------------------------------|
| Journal:                        | <i>BMJ Open</i>                                                                                                |
| Manuscript ID                   | bmjopen-2018-024078.R2                                                                                         |
| Article Type:                   | Research                                                                                                       |
| Date Submitted by the Author:   | 28-Jan-2019                                                                                                    |
| Complete List of Authors:       | Merrill, Ray; Brigham Young University, Public Health<br>Fowers, Rylan; Brigham Young University               |
| <b>Primary Subject Heading</b>: | Pharmacology and therapeutics                                                                                  |
| Secondary Subject Heading:      | Public health, Epidemiology                                                                                    |
| Keywords:                       | health risks, screening, prescription medication, health risk appraisal, body mass index, pharmaceutical costs |
|                                 |                                                                                                                |

SCHOLARONE™  
Manuscripts

1  
2  
3  
4  
5  
6  
7  
8  
9  
10  
11  
12  
13  
14  
15 **To what extent does sex, age, and BMI impact medical and pharmacy costs? A**  
16 **retrospective cohort study involving employees in a large school district**  
17  
18

19  
20 Ray M. Merrill, PhD, MPH, Rylan P. Fowers, BS  
21

22  
23 Department of Public Health, College of Life Sciences, Brigham Young University  
24  
25  
26  
27  
28  
29  
30  
31

32 Corresponding Author:  
33

34 Ray M. Merrill  
35

36 Department of Public Health  
37

38 2063 Life Sciences Building  
39

40 Provo, Utah 84602  
41

42 Email: [Ray\\_Merrill@byu.edu](mailto:Ray_Merrill@byu.edu)  
43

44 Telephone: 801-422-9788  
45

46 Fax: 801-422-9363  
47  
48  
49

50 Keywords: body mass index, obesity, prevention, pharmaceuticals, screening  
51

52 Word count: 3527  
53  
54  
55  
56  
57  
58  
59  
60

1  
2  
3 **Objective** To identify the extent that sex, age, and body mass index (BMI) is associated with  
4  
5 medical and pharmacy costs.  
6

7  
8 **Design** Retrospective cohort.  
9

10 **Setting** A school district in the Western United States involving 2531 workers continuously  
11  
12 employed during 2011-2014.  
13

14 **Main outcome measures** Medical and pharmacy costs and BMI.  
15

16  
17 **Results** Approximately 84% of employees participated in the wellness screening. Participants  
18  
19 were 1.03 (95% CI 1.01- 1.06) times more likely to be women and younger (M = 47.8 vs. 49.8, p  
20  
21 < 0.001). Median medical and pharmacy costs were higher for women than men, increased with  
22  
23 age, and were greater in morbidly obese individuals (p < 0.001). Annual pharmacy claims were  
24  
25 18% more likely to be filed by women than men, 23% more likely filed by those aged  $\geq 60$  versus  
26  
27 <40 years, and 6% more likely filed by morbidly obese individuals than of normal weight (p <  
28  
29 0.001) individuals. Greater medical and pharmacy costs in older age were most pronounced in  
30  
31 underweight and morbidly obese groups. Higher use of medication among women than men was  
32  
33 primarily because of drugs involving birth control, osteoporosis, thyroid disease, and urinary  
34  
35 tract infection. Higher medication use in older age was primarily related to medications used to  
36  
37 treat gastrointestinal problems. Medication use was positively associated with BMI weight  
38  
39 classifications for most of the 33 drug types considered, with exceptions involving birth control,  
40  
41 herpes, and osteoporosis. A J-shape relationship was observed between BMI and medication use  
42  
43 for acne, antibiotic, cold/influenza/allergy, eye infection, edema, muscle spasms, pain, and  
44  
45 ulcers.  
46  
47  
48  
49  
50  
51

52  
53 **Conclusions** Lowering medical and pharmacy costs requires weight management in older ages,  
54  
55 particularly for underweight and obese men and women. Medical costs were significantly  
56  
57  
58  
59  
60

1  
2  
3 reduced, likely due to effective drug treatment and prevention. Higher pharmacy costs for certain  
4  
5 drugs among underweight individuals may be associated with poorer nutrition.  
6  
7  
8  
9

#### 10 Strengths and limitations of this study

- 11 • A large cohort of employees was available for retrospective assessment of the  
12 association between sex, age, and BMI with medical and pharmacy costs.  
13
- 14 • The association between sex, age, and 33 specific types of medication were assessed,  
15 some of which have not been previously considered.  
16
- 17 • All active employees received employer-sponsored medical and pharmacy coverage,  
18 and above 84% had information that allowed us to determine body mass.  
19
- 20 • A few medications may have contributed to weight gain, which we were unable to  
21 adjust for in the current study.  
22
- 23 • The study population and patterns of prescription drug use may limit generalization of  
24 the results.  
25  
26  
27  
28  
29  
30  
31  
32  
33  
34  
35

## Introduction

Many companies offer wellness-screening programs consisting of health risk assessment and biometric screening. The 2016 Employer Health Benefits Survey found that among large firms (200 or more employees) in the United States, 59% offered health risk assessment (of which 32% had an incentive component) and 53% offered biometric screening (of which 31% included an incentive component).<sup>1</sup> These programs are intended to promote a greater sense of personal responsibility for lifestyle choices, identify the need for health behavior change, reduce future health problems, encourage patient management of existing health problems, decrease worker absenteeism, and improve job satisfaction and worker productivity.<sup>2-7</sup> Larger companies are also required to offer employer-sponsored medical and pharmacy coverage for their employees. Hence, information obtained on the health risk assessment and screenings can be compared with the medical and pharmacy costs.

Medical and pharmacy costs are influenced by a number of factors, including sex, age, and Body Mass Index (BMI).<sup>8-10</sup> Although medical costs are often a response to acute and chronic health conditions, pharmaceutical costs are often used to prevent more serious health problems. For example, antihypertensive medication, or statins, are useful in preventing cardiovascular disease;<sup>11-13</sup> multivitamins or folic acid for preventing congenital abnormalities;<sup>14</sup> aspirin and non-steroidal anti-inflammatory for preventing colorectal cancer;<sup>15</sup> bronchodilators, steroids, and anti-inflammatories for managing asthma;<sup>16</sup> and nonsteroidal anti-inflammatory drugs, steroids, analgesics, and immunosuppressive drugs for managing arthritis.<sup>17</sup> Consequently, wellness screening may actually increase use of prescription medication.<sup>18</sup>

1  
2  
3 Although a person's body weight may be associated with increased risk for various  
4 chronic health conditions and poorer health-related quality of life,<sup>19 20</sup> only in the last 15 years or  
5 so has its impact on healthcare expenditures been assessed.<sup>10</sup> Further, only a small number of  
6 studies have explored the association between body weight and prescription drug use. A study  
7 conducted in England found that overweight and obese individuals were more likely to receive  
8 medication for the cardiovascular system; gastrointestinal system; respiratory system; central  
9 nervous system; endocrine system; gynecology/urinary disorders; musculoskeletal and joint  
10 disorders; infections; eye, ear and oropharynx problems; and skin disorders.<sup>21</sup> A study in Sweden  
11 showed that use and cost of medication in general are significantly greater in obese individuals.<sup>22</sup>  
12 A study in the United States found that obesity was responsible for \$7 billion in Medicare  
13 prescription drug costs in 2006.<sup>23</sup> Another study conducted in the United States identified  
14 increased medication use during 1988 through 2012, with the increase most prominent among  
15 obese individuals.<sup>24</sup> A large cross-sectional study of 9789 adults in the National Health and  
16 Nutrition Examination Survey (NHANES) found that obese individuals utilize several  
17 prescription drugs (e.g., hypertension, lipid-lowering, and diabetes medications) more frequently  
18 than normal weight individuals.<sup>25</sup> Another study based on NHANES data found that while  
19 medication use increased over time for obese individuals compared with normal weight  
20 individuals ages 40 years and older, the increase was only marginal for those aged 25-39 years.<sup>26</sup>  
21 One study found that obese individuals used more analgesic, asthma, cardiovascular, diabetes,  
22 intranasal allergic rhinitis, thyroid, and ulcer medications.<sup>27</sup>  
23  
24  
25  
26  
27  
28  
29  
30  
31  
32  
33  
34  
35  
36  
37  
38  
39  
40  
41  
42  
43  
44  
45  
46  
47  
48

49 The purpose of the current study was to identify the extent to which sex, age, and BMI  
50 weight classifications are associated with medical and pharmacy costs among a large group of  
51 teachers, administrators, and other school staff. These associations are also evaluated for 33 more  
52  
53  
54  
55  
56  
57  
58  
59  
60



1  
2  
3 commonly prescribed medications.<sup>28</sup> Although studies have previously looked at the association  
4 between BMI and prescription medications, we evaluated some drugs that have not been  
5  
6 formerly considered, and the breadth of drugs covered is greater than in past studies. In addition,  
7  
8 evaluating the effect of being underweight on medical and pharmacy costs, and on specific drug  
9  
10 types, is unique to this study.  
11  
12  
13  
14  
15

## 16 **Methods**

### 17 *Patient and Public Involvement*

18  
19 A retrospective cohort study was conducted that associated sex, age, and BMI with medical and  
20  
21 pharmacy cost data for employees of a large school district in the western United States. Specific  
22  
23 patients and or the general public was not involved in this study. Body mass index was obtained  
24  
25 from those employees who participated in wellness screening. Employer-sponsored insurance  
26  
27 was available to all employees. The school district comprised six high schools, eight junior high  
28  
29 schools, and 31 elementary schools. Employees consisted of approximately three teachers to  
30  
31 every one staff member (cooks, bus drivers, grounds keepers, maintenance workers,  
32  
33 administrators, clerical workers, etc.). We were not provided specific job type and salary for each  
34  
35 employee. However, we can assume that the teachers, administrators, counselors, and nurses,  
36  
37 who represent almost all of the employees, had at least a college degree, that their salaries are  
38  
39 commensurate with other school districts, and that the employer-sponsored insurance coverage  
40  
41 was not strongly impacted by the employee's income or education.  
42  
43  
44  
45  
46  
47  
48

49 The study involved the academic years 2010-11, 2011-12, 2012-13, and 2013-14.  
50  
51 Employees were offered wellness screenings (personal health risk assessment [HRA] and  
52  
53 biometric evaluation) each fall. Medical and pharmacy claims data were also obtained for the  
54  
55  
56  
57  
58  
59  
60

1  
2  
3 employees in each academic year. Wellness screening and claims data were combined with a file  
4  
5 of eligible employees and assessed within each academic year. The eligibility file contained  
6  
7 information on current employment, sex, age, and year.  
8  
9

### 10 11 12 *Wellness Screening* 13

14  
15 All employees were offered wellness screening. Although participation was voluntary, it  
16  
17 was promoted through incentives. The HRA involved 36 questions. Biometric screenings  
18  
19 involved measurements of body mass index (BMI kg/m<sup>2</sup>), blood pressure (mm Hg), cholesterol  
20  
21 (mg/dL), and glucose (mg/dL). The HRA and biometric screenings were provided at no cost to  
22  
23 the employees, and were made available on location or with a personal physician. A health nurse  
24  
25 or physician assisted the employee in interpreting their HRA and screening results, in order to  
26  
27 help guide their need for lifestyle changes and control measures. The current study only  
28  
29 considers BMI. Weight classifications are based on commonly accepted ranges of BMI, as  
30  
31 follows: underweight (BMI < 18.5), normal weight (BMI 18.5-24), overweight (BMI 25-29),  
32  
33 obese (BMI 30-39), and morbidly obese (BMI 40+).  
34  
35  
36  
37  
38  
39

### 40 41 *Medical and Pharmacy Claims Data* 42

43 All active employees received employer-sponsored medical and pharmacy coverage, for  
44  
45 themselves and their families. The school district is fully insured with a retained-retention  
46  
47 agreement that makes the plan act very much like a self-funded health plan. Each month the  
48  
49 district pays a health insurance premium for the cost of healthcare and a small premium for  
50  
51 reinsurance of catastrophic claims. Catastrophic claims greater than \$250,000 are reinsured by a  
52  
53 stop loss policy and are not paid for by the school district. Employee pharmacy data do not  
54  
55  
56  
57  
58  
59

1  
2  
3 include over-the-counter drugs, but only those medications requiring a prescription. In the United  
4  
5 States, a drug is sold over-the-counter if the Food and Drug Administration deems it as  
6  
7 sufficiently safe and effective. These medications are not included in the current study. Further,  
8  
9 medical and pharmacy cost represents the amount paid by the insurance company as well as  
10  
11 copays by the employee.  
12  
13  
14  
15

### 16 17 *Statistical Techniques*

18  
19 Counts, means, standard deviations, medians, and percentages were used to describe the  
20  
21 study population. Pair-wise comparisons of means were evaluated for statistical significance  
22  
23 using the Student-Newman-Keuls Test. Risk ratios compare having a medical and pharmacy cost  
24  
25 above the 50<sup>th</sup> percentile (vs. below), 75<sup>th</sup> percentile (vs. below), and 90<sup>th</sup> percentile (vs. below).  
26  
27 Statistical significance was determined by the corresponding 95% confidence intervals. For  
28  
29 selected medications, the risk of medication use was compared using risk ratios and attributable  
30  
31 fraction percentages across the levels of sex, age, and BMI weight classifications. Statistical  
32  
33 significance of differences in percent use of selected medications across sex, age, and BMI  
34  
35 categories was based on two-sided tests of significance were based on the 0.05 level against a  
36  
37 null hypothesis of no association. Data was evaluated using the statistical software package PC-  
38  
39 SAS (version 9.4; SAS Institute, Inc., 2014).  
40  
41  
42  
43  
44  
45

### 46 47 **Results**

48  
49 In 2010-11, there were 3023 eligible employees, of which 2531 (83.72%) remained employed  
50  
51 through the academic year 2013-14. Those more likely to remain employed over the study period  
52  
53 were 40-59 years of age and had lower medical and pharmacy costs (Table 1). In 2010-11, ages  
54  
55  
56  
57  
58  
59

1  
2  
3 ranged from 18-76, with mean age significantly younger for those who remained employed (46.9  
4 vs. 49.2,  $p < 0.0001$ ). Those who remained employed had significantly lower mean medical costs  
5 (\$3056 vs. \$7887,  $p < 0.0001$ ) and mean pharmacy costs (\$859 vs. \$1105,  $p = 0.0387$ ). The  
6 results of this study are based on those continuously employed over the four academic years.  
7  
8  
9  
10  
11

12  
13 Most employees participated in annual wellness screening (84.1% in 2010-11, 84.4% in  
14 2011-12, 87.6% in 2012-13, and 80.7% in 2013-14). In 2010-11, there was no significant  
15 difference in mean medical cost between those who participated in wellness screening and those  
16 who did not (\$3148 vs. \$2571,  $p = 0.2900$ ). However, median medical cost was significantly  
17 greater for those who participated in wellness screening (\$588 vs. \$470,  $p = 0.0454$ ). For all  
18 academic years, women were 1.03 (95% CI 1.01- 1.06) times more likely than men to complete  
19 annual wellness screenings, after adjusting for age and academic year. Participants in wellness  
20 screening were significantly younger ( $M = 47.8$  vs.  $49.8$ ,  $p < 0.0001$ ), after adjusting for sex and  
21 year. Those participating in wellness screening had significantly lower mean medical cost  
22 (\$3093 vs. \$4181,  $p = 0.0013$ ), but experienced no significant difference in mean annual  
23 pharmacy costs, after adjusting for age, sex, and year.  
24  
25  
26  
27  
28  
29  
30  
31  
32  
33  
34  
35  
36  
37  
38

39 Among participants in annual wellness screening, mean BMI remained constant across  
40 the academic years (Table 2). Mean BMI was greater for men than women and in ages 40 years  
41 and older. Medical and pharmacy costs were highly positively skewed, with considerable  
42 variability. Hence, identifying significant differences in the mean costs across the levels of sex,  
43 age, and year, were less likely to occur than to find significant differences in the median costs  
44 across the levels of these variables. Medical costs were higher for women than men, increased  
45 with age, and were greater in morbidly obese individuals. Pharmacy costs were higher in women  
46 than men, increased with age, and were lowest in those of normal weight.  
47  
48  
49  
50  
51  
52  
53  
54  
55  
56  
57  
58  
59  
60

1  
2  
3 The risk of medical and pharmacy costs above the 50<sup>th</sup>, 75<sup>th</sup>, and 90<sup>th</sup> percentiles are  
4 shown according to sex, age, and BMI weight classification in Table 3. Higher BMI has a greater  
5 impact on higher percentiles of medical and pharmacy costs. For example, morbidly obese  
6 compared with normal weight are 1.13 (13%), 1.30 (30%), and 1.93 (93%) more likely to have  
7 pharmacy costs above the 50<sup>th</sup>, 75<sup>th</sup>, and 90<sup>th</sup> percentiles, respectively. Medical and pharmacy  
8 costs above these percentiles are greater in women than men and increase with age.  
9

10  
11  
12 Associations between selected percentiles of medical and pharmacy costs and BMI  
13 weight classifications varied according to age (Figure 1), but not sex (data not shown). Greater  
14 medical and pharmacy costs with older age groups are seen in the graph. However, the  
15 increasing costs with higher age are most pronounced in the underweight and morbidly obese  
16 groups.  
17

18  
19  
20 Medication use is shown across sex, age, and BMI groups in Table 4. For any  
21 medication, women were 18% more likely to file a claim than men, employees 60 years of age or  
22 older were 23% more likely to file a claim than those less than 40 years, and morbidly obese  
23 were 6% more likely to file a claim than those of normal weight. For 22 of the 33 medications  
24 considered, the percentage of annual claims was higher for women than men. For high blood  
25 pressure and statins was the percentage of claims greater for men than women. For 25 of the  
26 medications, the percentage of annual claims increased with age. For 24 of the medications, the  
27 percentage of annual claims was associated with BMI (20 positively and 4 negatively). The  
28 strongest positive associations involved diabetes, high cholesterol (statins), blood thinners, high  
29 blood pressure, and edema. Negative associations involved acne, birth control, Herpes, and  
30 osteoporosis. The highest annual percent of acne, antibiotic, cold/influenza/allergy, and eye  
31 infection medications occurred in underweight individuals. For edema, muscle spasms, pain, and  
32  
33  
34  
35  
36  
37  
38  
39  
40  
41  
42  
43  
44  
45  
46  
47  
48  
49  
50  
51  
52  
53  
54  
55  
56  
57  
58  
59  
60

1  
2  
3 ulcers, medication use was comparatively high in underweight individuals, dropped for normal  
4 weight, and then increased in higher weight classifications.  
5  
6

7  
8 We also report the attributable fraction in the population. For example, this statistic says  
9 that 8.82% of diabetes medication is attributed to being overweight, 20.34% is attributed to being  
10 obese, and 30.43% is attributed to being morbidly obese. Where the risk ratio is less than 1, the  
11 preventive fraction can be estimated. For example, the risk of requiring osteoporosis medication  
12 is lower for obese compared with normal weight employees (i.e., Risk Ratio = 0.54). The  
13 corresponding preventive fraction is 66%, meaning in the absence of obesity there would be 66%  
14 fewer claims for osteoporosis medication. The attributable fraction in the population and the  
15 preventive fraction both assume a cause-and-effect association between exposure and disease.  
16  
17  
18  
19  
20  
21  
22  
23  
24  
25  
26  
27  
28  
29

### 30 **Discussion**

31  
32 The current study identified the degree to which sex, age, and BMI are associated with medical  
33 and pharmacy costs among employees in a large school district. Associations were also evaluated  
34 for 33 commonly prescribed medications.<sup>28</sup> The study extends previous research by including  
35 certain medications not previously evaluated and considering associations for all BMI weight  
36 classifications.  
37  
38  
39  
40  
41  
42

43 Higher medical and pharmacy costs among women, in older age, and among those not of  
44 normal weight is consistent with previous research.<sup>8-10</sup> Greater medical and pharmacy costs with  
45 older age are most pronounced in the underweight and morbidly obese groups. Hence, weight  
46 management at older ages appears particularly important in terms of lowering medical and  
47 pharmacy costs.  
48  
49  
50  
51  
52  
53  
54  
55  
56  
57  
58  
59  
60

1  
2  
3 Higher medication use in women than men was primarily because of drugs involving  
4 birth control, osteoporosis, thyroid disease, and urinary tract infection. Prescription costs for  
5 vitamins/minerals were also noticeably higher in women than men. Family planning and prenatal  
6 care may explain the greater use of birth control medications and vitamins/minerals among  
7 women. Loss of estrogen in women at older ages and female reproductive hormones may  
8 contribute to the higher level of osteoporosis and thyroid disease in women.<sup>29 30</sup>

9  
10 Medication use was higher in those aged 60 years and older compared with those younger  
11 than 40, primarily because of diabetes, edema, high blood pressure, high cholesterol (statins),  
12 and thyroid disease. Previous research has shown that the risk of these diseases increase with  
13 age.<sup>31-35</sup> Medication use also noticeably increased with age for acid reflux, bowel/rectum,  
14 inflammation, and stomach acid. This is consistent with older age tending to be associated with  
15 more gastrointestinal problems.<sup>36</sup>

16  
17 Medication use was highest in those who were morbidly obese. We found positive  
18 associations between body weight and higher use of medications for treating acid reflux, fungus,  
19 bacterial infections, arthritis, asthma, colds, influenza, allergies, depression, diabetes, edema,  
20 high blood pressure, muscle spasms, nausea/vomiting, pain, high cholesterol, stomach acid,  
21 thyroid, and ulcers. Other studies have identified a similar associations.<sup>21 24 25 27</sup> Morbidly obese  
22 individuals were also more likely to be prescribed vitamins and minerals than normal weight  
23 individuals. We did not find an association between body weight and increased use of  
24 medication for the bowel/rectum, skin, or urinary tract, which was counter to that found in other  
25 studies.<sup>21 37-39</sup> We also assessed but did not find a significant association for medications used to  
26 treat anxiety, insomnia, convulsions, or teeth and gums. The insignificant finding for  
27 anticonvulsants and teeth and gums may be because of insufficient power (i.e., small numbers).

1  
2  
3 Finally, we assessed the association between body weight and medications for birth control,  
4 herpes, and osteoporosis, wherein significant negative associations were found. We are not  
5 aware of other studies that have looked at the association between body weight and medications  
6 used for colds, influenza, depression, edema, birth control, herpes, or osteoporosis.  
7  
8  
9  
10

11  
12 Greater use of medication to treat acid reflux or stomach acid among individuals with  
13 higher BMI is consistent with previous research showing hospitalization rates for reflux disease  
14 to be positively associated with BMI.<sup>40 41</sup> Another study found that higher BMI was associated  
15 with increased gastroesophageal reflux in both normal and overweight individuals.<sup>42</sup> Heavier  
16 body weight can add pressure to the stomach and diaphragm, thereby resulting in reflux. Further,  
17 increased use of medication for nausea/vomiting among individuals with higher BMI weight  
18 classifications is consistent with other research.<sup>43</sup>  
19  
20  
21  
22  
23  
24  
25  
26  
27  
28

29 The positive association between higher BMI and increased use of medication for ulcers  
30 is consistent with other research, particularly peptic (gastric and duodenal) ulcers.<sup>44 45</sup> The  
31 mechanism to explain the association between obesity and peptic ulcer disease remains unclear.  
32  
33 Obesity is also associated with *Helicobacter pylori*, which has been linked with gastric ulcers.<sup>46</sup>  
34  
35  
36  
37  
38

39 Previous research has shown that overweight and obese individuals are at greater risk for  
40 infections.<sup>37-49</sup> This is consistent with our findings that show increased use of antibiotics and  
41 medication for acne, colds/influenza/allergy, and eye infections among obese individuals.  
42  
43 However, it has been shown previously that antibiotics can also weaken the immune system,<sup>50</sup> as  
44 well as lead to obesity.<sup>51</sup> Some inflammatory diseases known to be associated with obesity in  
45 which we found a positive association between obesity and medication included influenza,<sup>52 53</sup>  
46 heart disease,<sup>54</sup> diabetes,<sup>55</sup> allergies,<sup>56-59</sup> asthma,<sup>60</sup> edema,<sup>61-63</sup> and arthritis.<sup>64-67</sup> A compromised  
47  
48  
49  
50  
51  
52  
53  
54  
55  
56  
57  
58  
59  
60



1  
2  
3 immune system may also trigger autoimmune diseases, including rheumatoid arthritis and  
4  
5 thyroid disease,<sup>68</sup> as indicated in the current study.  
6  
7

8 Overweight and obese individuals were more likely to receive cold, influenza, or allergy  
9 medication. Obesity is associated with impaired immune response to influenza vaccination in  
10 humans.<sup>69</sup> Because vaccination is less successful for obese individuals,<sup>70 71</sup> a greater level of  
11 medication may be sought for treating colds, influenza, and allergies.  
12  
13  
14  
15  
16  
17

18 Overweight and obese individuals received higher levels of pain medication. Research  
19 indicates that the nature of the relationship between higher BMI and pain is likely indirect.<sup>72</sup> For  
20 example, greater body weight is associated with osteoarthritis, which, in turn, leads to pain.<sup>73</sup>  
21 Being overweight or obese may result in greater risk for back pain, joint pain, and muscle  
22 spasms.<sup>74</sup> One study also found that obese individuals were more sensitive than those of normal  
23 weight to pressure pain.<sup>75</sup>  
24  
25  
26  
27  
28  
29  
30  
31  
32

33 We found that higher BMI was associated with depression medication, as consistent with  
34 previous research.<sup>76-79</sup> In one study, the age-adjusted level of depression among adults (ages 20  
35 and older) in the United States was 43.2% for those with depression compared with 33.0% for  
36 those without depression.<sup>80</sup> It may be that higher use of prescription medication for depression  
37 among those with greater BMI is partly because these people are more likely to experience other  
38 conditions related to depression, such as heart disease and diabetes.<sup>81-83</sup>  
39  
40  
41  
42  
43  
44  
45  
46

47 There was more use of vitamins/minerals among morbidly obese employees. Of the  
48 prescribed vitamins/minerals only 8.0% involved vitamin B and 57.3% involved vitamin D. A  
49 previous study showed an association between low vitamin B12 and being obese.<sup>84</sup> Another  
50 study found that the prevalence of vitamin D deficiency was 35% greater in obese individuals.<sup>85</sup>  
51  
52  
53  
54  
55  
56  
57  
58  
59  
60

1  
2  
3 Acne, antibiotic, cold/influenza/allergy, and eye infection medications were prescribed  
4 more often for underweight individuals. This is consistent with underweight individuals having  
5 poorer nutrition and, consequently, a weakened immune system.<sup>86</sup> For edema, muscle spasms,  
6 pain, and ulcers, medication use showed a J-shape relationship with BMI weight classification.  
7  
8 Poor nutrition may also explain the higher levels of medication use among underweight  
9 individuals for these medications. Despite mean medical costs being similar for those who  
10 participated in wellness screening during the first year of the study, over the four academic years,  
11 participants in wellness screening ended up having significantly lower mean medical costs.  
12  
13 However, pharmacy costs did not go down. It has been shown that wellness screening can cause  
14 the number and cost of pharmaceuticals to go up, at least initially, as the need for treatment is  
15 identified.<sup>87</sup> Identified treatment needs can then, in turn, help prevent more costly health  
16 problems in the future. For example, medications used to treat high blood pressure can result in  
17 lowering the risk of diabetes, heart disease, stroke and kidney disease; treatment of insomnia can  
18 help lower the risk of irritability, depression or anxiety, difficulty paying attention, and accidents  
19 due to increased errors; treatment of high cholesterol with statins can help lower the risk of  
20 cardiovascular disease; treatment of oral infections can help reduce the risk of diabetes,  
21 cardiovascular disease, and preterm birth; and vitamins/minerals can help prevent a host of  
22 diseases (scurvy, rickets, anemia, neural tube defects, pellagra, etc.). High blood pressure and  
23 statin medications were among the highest prescribed in our study.  
24  
25  
26  
27  
28  
29  
30  
31  
32  
33  
34  
35  
36  
37  
38  
39  
40  
41  
42  
43  
44  
45  
46

47 A limitation of this study involves external validity (generalizability). Specifically, the  
48 study only considered those individuals who remained employed over all four academic years.  
49  
50 These people were generally healthier and in the age range 40-59. The study also focused on  
51 those who completed wellness screening because they contained BMI information. These  
52  
53  
54  
55  
56  
57  
58  
59  
60

1  
2  
3 employees were more likely women and younger. In addition, the causal direction between  
4 medication use and BMI could not be determined. That is, some medications may have  
5 contributed to body mass whereas others were in response to body mass. Finally, the current  
6 study did not have information on the use of vitamins or minerals obtained over the counter and  
7 small numbers made it impossible to evaluate the relationship between specific types of  
8 vitamins/minerals and sex, age, and BMI.  
9  
10  
11  
12  
13  
14  
15  
16  
17  
18  
19  
20

## 21 **Conclusion**

22  
23 Weight management at older ages, particularly in underweight and morbidly obese individuals, is  
24 most important for lowering medical and pharmacy costs. Medical costs decreased, possibly  
25 because of effective drug treatment and prevention. Pharmacy costs remained constant, possibly  
26 because screening identified a need for certain medications. Greater use of medication among  
27 women than men is primarily because of drugs involving birth control, osteoporosis, thyroid  
28 disease, and urinary tract infection. Greater medication use in older age is primarily related to  
29 medications used to treat gastrointestinal problems. Medication use was positively associated  
30 with BMI for most of the conditions being treated, with exceptions involving birth control,  
31 herpes, and osteoporosis. A J-shape relationship between BMI weight classification and  
32 medication use for acne, antibiotic, cold/influenza/allergy, eye infection, edema, muscle spasms,  
33 pain, and ulcers may be because of poorer nutrition in underweight individuals.  
34  
35  
36  
37  
38  
39  
40  
41  
42  
43  
44  
45  
46  
47  
48  
49  
50  
51  
52  
53  
54  
55  
56  
57  
58  
59  
60

## References

1. 2016 Employer Health Benefits Survey. kff.org. <http://www.kff.org/health-costs/report/2016-employer-health-benefits-survey/>. Published September 14, 2016. Accessed February 21, 2018.
2. Chen L, Hannon PA, Laing SS, Kohn MJ, Clark K, Pritchard S, Harris JR. Perceived workplace health support is associated with employee productivity. *Am J Health Promot.* 2015;29(3):139-146.
3. Centers for Disease Control and Prevention. cdc.gov. <http://www.cdc.gov/sustainability/worksitewellness/> Worksite wellness. Updated December 9, 2014. Accessed March 18, 2018.
4. Michaels CN, Greene AM. Worksite wellness: increasing adoption of workplace health promotion programs. *Health Promot Pract.* 2013;14(4):473-479.
5. Witt LB, Olsen D, Ablah E. Motivating factors for small and midsized businesses to implement worksite health promotion. *Health Promot Pract.* 2013;14(6), 876-884.
6. Niessen MA, Kraaijenhagen RA, Dijkgraaf MG, van Pelt D, van Kalken CK, Peek N. Impact of a Web-based worksite health promotion program on absenteeism. *J Occup Environ Med.* 2012;54(4):404-408.
7. Kaspin LC, Gorman KM, Miller RM. Systematic review of employer-sponsored wellness strategies and their economic and health-related outcomes. *Popul Health Manag.* 2013;16(1): 14-21.
8. Metge C, Black C, Peterson S, Kozyrskyi AL. The population's use of pharmaceuticals. *Med Care.* 1999;37(6 Suppl):JS42-JS59.

- 1  
2  
3 9. Bertakis K, Azari R, Helms L, Callahan E, Robbins J. Gender differences in the utilization of  
4 health care services. *J Fam Pract.* 2000;49(2):147-152.  
5  
6
- 7  
8 10. Arterburn DE, Maciejewski ML, Tsevat J. Impact of morbid obesity on medical expenditures  
9 in adults. *Int J Obes.* 2005;29(3):334-339.  
10  
11
- 12 11. Karmali KN, Lloyd-Jones DM, Berendsen M, et al. Drugs for primary prevention of  
13 atherosclerotic cardiovascular disease: an overview of systematic reviews. *JAMA Cardiol.*  
14 2016;1(3):341-349.  
15  
16
- 17 12. Fretheim A, Odgaard-Jensen, Brørs O, Madsen S, et al. Comparative effectiveness of  
18 antihypertensive medication for primary prevention of cardiovascular disease: systematic  
19 review and multiple treatments meta-analysis. *BMC Med.* 2012;10:33.  
20  
21
- 22 13. Taylor F, Huffman MD, Macedo A, et al. Statins for the primary prevention of  
23 cardiovascular disease. *Cochrane.* 2013. [http://www.cochrane.org/CD004816/VASC\\_statins-](http://www.cochrane.org/CD004816/VASC_statins-primary-prevention-cardiovascular-disease)  
24 primary-prevention-cardiovascular-disease. Accessed February 21, 2018.  
25  
26
- 27 14. Czeizel AE. Birth defects are preventable. *Int J Med Sci.* 2005;2(3):91-92.  
28  
29
- 30 15. Chan AT, Giovannucci EL. Primary prevention of colorectal cancer. *Gastroenterology.*  
31 2010;138(6):2029-2043.  
32  
33
- 34 16. Asthma. Mayo Clinic. [https://www.mayoclinic.org/diseases-conditions/asthma/diagnosis-](https://www.mayoclinic.org/diseases-conditions/asthma/diagnosis-treatment/drc-20369660)  
35 treatment/drc-20369660. Published March 9, 2018. Accessed February 24, 2018.  
36  
37
- 38 17. Arthritis. Mayo Clinic. [https://www.mayoclinic.org/diseases-conditions/arthritis/diagnosis-](https://www.mayoclinic.org/diseases-conditions/arthritis/diagnosis-treatment/drc-20350777)  
39 treatment/drc-20350777. Published March 7, 2018. Accessed February 24, 2018.  
40  
41
- 42 18. Preventive Medicine Reports Paper  
43  
44
- 45 19. Thompson D, Edelsberg J, Colditz GA, Bird AP, Oster G. Lifetime health and economic  
46 consequences of obesity. *Arch Intern Med.* 1999;119(18):2177-2183.  
47  
48  
49  
50  
51  
52  
53  
54  
55  
56  
57  
58  
59  
60

- 1  
2  
3 20. Pi-Sunyer X. The medical risks of obesity. *Postgrad Med.* 2009;121(6):21-33.  
4
- 5 21. Kinge JM, Morris S. Association between obesity and prescribed medication use in England.  
6  
7 *Econ Hum Biol.* 2014;15:47-55.  
8
- 9 22. Narbro K, Agren G, Jonsson E, et al. Pharmaceutical costs in obese individuals: comparison  
10  
11 with a randomly selected population sample and long-term changes after conventional and  
12  
13 surgical treatment: the SOS intervention study. *Arch Intern Med.* 2002;162(18):2061-2069.  
14
- 15 23. Finkelstein EA, Trogdon JG, Cohen JW, Dietz W. Annual medical spending attributable to  
16  
17 obesity: payer-and service-specific estimates. *Health Aff.* 2009;28(5):w822-31.  
18
- 19 24. Randhawa AK, Parikh JS, Kuk JL. Trends in medication use by body mass index and age  
20  
21 between 1988 and 2012 in the United States. *PLoS One.* 2017 Sep 20;12(9):e0184089.  
22
- 23 25. Kit BK, Ogden CL, Flegal KM. Prescription medication use among normal weight,  
24  
25 overweight, and obese adults, United States, 2005-2008. *Ann Epidemiol.* 2012;22(2):112-  
26  
27 119.  
28
- 29 26. Jarrett B, Bloch GJ, Bennett D, Bleazard B, Hedges D. The influence of body mass  
30  
31 index, age and gender on current illness: a cross-sectional study. *Int J Obes.* 2010;34(3):429-  
32  
33 436.  
34
- 35 27. Raebel MA, Malone DC, Conner DA, Xu S, Porter JA, Lanty FA. Health services use  
36  
37 and health care costs of obese and nonobese individuals. *Arch Intern*  
38  
39 *Med.* 2004;164(19):2135-2140.  
40
- 41 28. Fuentes AV, Pineda MD, Venkata KCN. Comprehension of top 200 prescribed drugs in  
42  
43 the US as a resource for pharmacy teaching, training and practice. *Pharmacy (Basel).*  
44  
45 2018;6(2):E43.  
46
- 47 29. Alswat KA. Gender disparities in osteoporosis. *Clin Med Res.* 2017;9(5): 382–387.  
48  
49  
50  
51  
52  
53

- 1
- 2
- 3 30. Li H, Li J. Thyroid disorders in women. *Minerva Med.* 2015;106(2):109-114.
- 4
- 5 31. Kirkman MS, Briscoe VJ, Clark N, et al. Diabetes in older adults. *Diabetes Care.*
- 6
- 7 2012;35(12):2650-2664.
- 8
- 9
- 10 32. Traves KP, Studdiford JS, Pickle S, Tully AS. Edema: diagnosis and management. *Am Fam*
- 11
- 12 *Physician.* 2013;88(2):102-110.
- 13
- 14 33. Mc Donald Posso AJ, Motta Borrel JA, Fontes F, Cruz Gonzalez CE, Pachón Burgos
- 15
- 16 AA, Cumbreira Ortega A. High blood pressure in Panama: Prevalence, sociodemographic and
- 17
- 18 biologic profile, treatment, and control (STROBE). *Medicine (Baltimore).* 2014;93(22):
- 19
- 20 e101.
- 21
- 22
- 23 34. Ferrara A, Barrett-Connor E, Shan J. Total, LDL, and HDL cholesterol decrease with age in
- 24
- 25 older men and women. The Rancho Bernardo Study 1984-1994. *Circulation.* 1997;96(1):37-
- 26
- 27 43.
- 28
- 29
- 30 35. Gesing A. The thyroid gland and the process of aging. *Thyroid Res.* 2015;8(Suppl 1):A8.
- 31
- 32
- 33 36. A L D'Souza. Ageing and the gut. *Postgrad Med J.* 2007; 83(975):44–53.
- 34
- 35 37. Ma Y, Yang Y, Wang F, et al. Obesity and risk of colorectal cancer: a systematic review of
- 36
- 37 prospective studies. *PLoS One.* 2013;8(1):e53916.
- 38
- 39
- 40 38. Brown J, Wimpenny P, Maughan H. Skin problems in people with obesity. *Nurs Stand.*
- 41
- 42 2004;18(35):38-42.
- 43
- 44 39. Semins MJ, Shore AD, Makary MA, Weiner J, Matlaga BR. The impact
- 45
- 46 of obesity on urinary tract infection risk. *Urology.* 2012;79(2):266-269.
- 47
- 48
- 49 40. Ruhl CE, Everhart JE. Overweight, but not high dietary fat intake, increases risk of
- 50
- 51 gastroesophageal reflux disease hospitalization: the NHANES I Epidemiologic Followup
- 52
- 53
- 54
- 55
- 56
- 57
- 58
- 59
- 60

- 1  
2  
3 Study. First National Health and Nutrition Examination Survey. *Ann Epidemiol.*  
4  
5 1999;9(7):424-435.  
6  
7  
8 41. Anggiansah R, Sweis R, Anggiansah A, Wong T, Cooper D, Fox M. The effects of obesity  
9  
10 on oesophageal function, acid exposure and the symptoms of gastro-oesophageal reflux  
11  
12 disease. *Alim Pharmacol Ther.* 2013;37(5):555-563.  
13  
14  
15 42. Jacobson BC, Somers SC, Fuchs CS, Kelly CP, Camargo CA Jr. Association between body  
16  
17 mass index and gastroesophageal reflux symptoms in both normal weight and overweight  
18  
19 women. *N Engl J Med.* 2006;354(22):2340-2348.  
20  
21  
22 43. Talley NJ, Howell S, Poulton R. Obesity and chronic gastrointestinal tract symptoms in  
23  
24 young adults: a birth cohort study. *Am J Gastroenterol* 2004;99(9):1807-1814.  
25  
26  
27 44. Boylan MR, Khalili H, Huang ES, Chan AT. Measures of adiposity are associated with  
28  
29 increased risk of peptic ulcer. *Clin Gastroenterol Hepatol.* 2014 Oct;12(10):1688-1694.  
30  
31  
32 45. Kim J, Kim KH, Lee BJ. Association of peptic ulcer disease with obesity, nutritional  
33  
34 components, and blood parameters in the Korean population. *PLoS One.* 2017;12(8):  
35  
36 e0183777.  
37  
38 46. Xu M, Liu L, Yuan B, Yin J, Lu Q. Association of obesity with *Helicobacter pylori* infection:  
39  
40 A retrospective study. *World J Gastroenterol* 2017;23(15):2750-2756.  
41  
42  
43 47. Falagas ME, Kompoti M. Obesity and infection. *Lancet Infect Dis* 2006;6(7)438-446.  
44  
45  
46 48. Huttunen R, Syrjanen J. Obesity and the risk and outcome of infection. *Int J Obes.*  
47  
48 2013;37:333-340.  
49  
50 49. Lübbecke A, Zingg M, Hoffmeyer P, et al. Body mass and weight thresholds for increased  
51  
52 prosthetic joint infection rates after primary total joint arthroplasty. *Acta Orthopaedica.*  
53  
54 2016;87(2):132-138  
55  
56  
57  
58  
59  
60



- 1  
2  
3 50. Yang JH, Bhargava P, McCloskey D, Mao N, Palsson BO, Collins JJ. Antibiotic-induced  
4 changes to the host metabolic environment inhibit drug efficacy and alter immune function.  
5  
6 Cell Host & Microbe. 2017;22(6):757-765.  
7  
8  
9
- 10 51. Early G. Current Evidence regarding antibiotic exposure and childhood obesity: an  
11 integrative review. *Ped Nurs*. 2017;43(4):169-174.  
12  
13
- 14 52. Bandaru P, Rajkumar H, Napanveettil G. The impact of obesity on immune response to  
15 infection and vaccine: an insight into plausible mechanisms. *Endocrinol Metab Syndr*  
16  
17 2013;2:2.  
18  
19
- 20 53. Kwong JC, Campitelli MA, Rosella LC. Obesity and respiratory hospitalizations during  
21 influenza seasons in Ontario, Canada: a cohort study. *Clin Infect Dis*. 2011;53(5):413-421.  
22  
23
- 24 54. Wang Z, Nakayama T. Inflammation, a link between obesity and cardiovascular disease.  
25  
26 *Mediators Inflamm*. 2010;2010:535918.  
27  
28
- 29 55. Bastard JP, Maachi M, Lagathu C, Kim MJ, Caron M, Vidal H, Capeau J, Feve B. Recent  
30 advances in the relationship between obesity, inflammation, and insulin resistance. *Eur*  
31  
32 *Cytokine Netw*. 2006;17(1):4-12.  
33  
34
- 35 56. Ciprandi G, Pistorio A, Tosca M, Ferraro MR, Cirillo I. Body mass index, respiratory  
36 function and bronchial hyperactivity in allergic rhinitis and asthma. *Respir Med*  
37  
38 2009;103(2):289-295.  
39  
40
- 41 57. Gorgievska-Sukarovska B, Lipozencić J, Susac A. Obesity and allergic diseases. *Acta*  
42  
43 *Dermatovenerol Croat*. 2008;16(4):231-235.  
44  
45
- 46 58. Shah R, Yang Y. Health and economic burden of obesity in elderly individuals with asthma  
47  
48 in the United States. *Popul Health Manag* 2015;18(3):186-191.  
49  
50  
51  
52  
53  
54  
55  
56  
57  
58  
59  
60

- 1  
2  
3 59. Guo Y, Moon JY, Laurie CC, et al. Genetic Predisposition to Obesity is associated  
4 with Asthma in US Hispanics/Latinos: Results from the Hispanic Community Health  
5 Study/Study of Latinos. *Allergy*. 2018;doi: 10.1111/all.13450. [Epub ahead of print]  
6  
7  
8  
9  
10 60. Rodriguez D. Obesity and Asthma – What’s the Connection.  
11  
12 <https://www.everydayhealth.com/asthma/obesity-connection.aspx>. Published August 28,  
13 2013. Accessed April 12, 2018.  
14  
15  
16  
17 61. Greene, A.K., et al. Lower-Extremity Lymphedema and Elevated Body-Mass Index. *N Engl*  
18 *J Med*. 2012;366:2136-2137.  
19  
20  
21 62. Helyer, L.K., et al. Obesity is a risk factor for developing postoperative lymphedema in  
22 breast cancer patients. *Breast J*. 2012;16(1):48-54.  
23  
24  
25  
26 63. Greene AK, Grant FD, Slavin SA, Maclellan RA. Obesity-induced lymphedema: clinical and  
27 lymphoscintigraphic features. *Plast Reconstr Surg*. 2015;135(6):1715-1719.  
28  
29  
30  
31 64. King LK, March L, Anandacoomarasamy A. Obesity & osteoarthritis. *Indian J Med Res*.  
32 2013;138(2):185-193.  
33  
34  
35 65. Baodong Qin, Min Yang, Haitao Fu, et al. Body mass index and the risk of rheumatoid  
36 arthritis: a systematic review and dose-response meta-analysis. *Arthritis Res Ther*.  
37 2015;17(1):86.  
38  
39  
40  
41  
42 66. Feng J, Chen Q, Yu F, et al. Body mass index and risk of rheumatoid arthritis: a meta-  
43 analysis of observational studies. *Medicine*. 2016;95(8):e2859.  
44  
45  
46  
47 67. Albrecht K, Richter A, Callhoff J, et al. Body mass index distribution in rheumatoid arthritis:  
48 a collaborative analysis from three large German rheumatoid arthritis databases. *Arthritis Res*  
49 *Ther*. 2016;18:149.  
50  
51  
52  
53  
54  
55  
56  
57  
58  
59  
60

- 1  
2  
3 68. Rodriguez D. How Your Immune System Worsens Arthritis. EverydayHealth.com.  
4  
5 <https://www.everydayhealth.com/arthritis/understanding/the-immune-system.aspx>. Published  
6  
7 August 1, 2012. Accessed April 11, 2018.  
8  
9
- 10 69. Sheridan PA, Paich HA, Handy J, et al. Obesity is associated with impaired immune response  
11  
12 to influenza vaccination in humans. *Int J Obes*. 2012;36(8):1072-1077.  
13  
14
- 15 70. Painter SD, Ovsyannikova IG, Poland GA. The weight of obesity on the human immune  
16  
17 response to vaccination. *Vaccine*. 2015;33(36): 4422–4429.  
18  
19
- 20 71. Young KM, Gray CM, Bekker LG. Is Obesity a Risk Factor for Vaccine Non-  
21  
22 Responsiveness? *PLoS One*. 2013;8(12): e82779.  
23  
24
- 25 72. Okifuji A, Hare BD. The association between chronic pain and obesity. *J Pain Res*.  
26  
27 2015;8:399-408.  
28  
29
- 30 73. Erdmann J. Osteoarthritis and Obesity. [www.arthritis.org](http://www.arthritis.org). [https://www.arthritis.org/living-](https://www.arthritis.org/living-with-arthritis/comorbidities/obesity-arthritis/osteoarthritis-and-obesity.php)  
31  
32 [with-arthritis/comorbidities/obesity-arthritis/osteoarthritis-and-obesity.php](https://www.arthritis.org/living-with-arthritis/comorbidities/obesity-arthritis/osteoarthritis-and-obesity.php). Accessed April  
33  
34 11, 2018.  
35  
36
- 37 74. American Obesity Association. Health effects of obesity. AOA Fact Sheets. 2002.  
38
- 39 75. Tashani OA, Asitita R, Sharp D, Johnson MI. Body mass index and distribution of body fat  
40  
41 can influence sensory detection and pain sensitivity. *Eur J Pain* 2017;21(7):1186-1196.  
42  
43
- 44 76. Rathee N. Obesity and depression: Are they related? *Indian J Health Well*. 2017;8(12):1472-  
45  
46 1475.  
47
- 48 77. Zhao G, Ford ES, Dhingra S, Li C, Strine TW, Mokdad AH. Depression and anxiety among  
49  
50 US adults: associations with body mass index. *Int J Obesity*. 2009;33(2):257-266.  
51  
52  
53  
54  
55  
56  
57  
58  
59  
60

- 1  
2  
3 78. Onyike CU, Crum RM, Lee HB, Lyketsos DG, Eaton WW. Is obesity associated with major  
4 depression? Results from the Third National Health and Nutrition Examination Survey. *Am J*  
5  
6 *Epidemiol.* 2003;158(12):1139-1147.  
7  
8  
9  
10 79. Petry NM, Barry D, Pietrzak RH, Wagner JA. Overweight and obesity are associated with  
11  
12 psychiatric disorders: results from the National Epidemiologic Survey on Alcohol and  
13  
14 Related Conditions. *Psychosom Med.* 2008;70(3):288-297.  
15  
16  
17 80. Pratt LA, Brody DJ. Depression and obesity in the U.S. adult household population, 2005-  
18  
19 2010. NCHS Data Brief, No. 167, October 2014.  
20  
21  
22 81. McElroy SL, Kotwal R, Malhotra S, Nelson EB, Keck PE, Nemeroff CB. Are mood  
23  
24 disorders and obesity related? A review for the mental health professional. *J Clin Psychiatry*  
25  
26 2004;65(5):634-651.  
27  
28  
29 82. Ferraro KF, Su Y, Gretebeck RJ, Black DR, Badylak SF. Body mass index and disability in  
30  
31 adulthood: A 20-year panel study. *Am J Public Health.* 2002;92(5):834-840.  
32  
33  
34 83. Katon W, Ciechanowski P. Impact of major depression on chronic medical illness. *J*  
35  
36 *Psychosom Res.* 2002;53(4):859-863.  
37  
38  
39 84. Baltaci D, Kutlucan A, Turker Y, et al. Association of vitamin B12 with obesity, overweight,  
40  
41 insulin resistance and metabolic syndrome, and body fat composition; primary care-based  
42  
43 study. *Med Glas.* 2013;10(2):203-210.  
44  
45  
46 85. Pereira-Santos M, Costa PR, Assis AM, Santos CA, Santos DB. Obesity and vitamin D  
47  
48 deficiency: a systematic review and meta-analysis. *Obes Rev.* 2015;16(4):341-349.  
49  
50  
51 86. Black RE, Morris SS, Bryce J. Where and why are 10 million children dying every year? *The*  
52  
53 *Lancet* 2003;361:2226-2234.  
54  
55  
56  
57  
58  
59  
60

1  
2  
3 87. Merrill RM, Telford CT. Pharmaceutical use according to participation in worksite wellness  
4 screening and health campaigns. *Prev Med Rep* 2018;12:158-163.  
5  
6  
7

## 8 **Footnotes**

9

10  
11 Contributors: RMM conceived and designed the epidemiological study, contributed to  
12 acquisition of data, analyzed and interpreted the data, and drafted the manuscript. RPF  
13 interpreted the data, provided a literature review, and revised the manuscript. Both authors  
14 critically revised the manuscript for important intellectual content. The manuscript has been read  
15 and approved by both authors.  
16  
17  
18  
19  
20  
21  
22

23 Funding: The authors have not declared a specific grant for this research from any funding  
24 agency in the public, commercial or not-for-profit sectors.  
25  
26  
27

28 Competing interests: None declared.  
29  
30

31 Patient consent: Not required.  
32  
33

34 Ethics approval: Study approval was obtained from the institutional review board at Brigham  
35 Young University (IRB E1 5259).  
36  
37  
38

39 Provenance and peer review: Not commissioned; externally peer reviewed.  
40  
41

42 Data sharing statement: The data sets used and analyzed in the current study are available from  
43 the corresponding author on reasonable request at: [Ray\\_Merrill@byu.edu](mailto:Ray_Merrill@byu.edu)  
44  
45  
46  
47  
48  
49  
50  
51  
52  
53  
54  
55  
56  
57

Table 1 Characterization of the study group according to sex, age, medical and pharmacy costs

|                            | No.  | %     | Continuously Employed % | Chi-square p value | Risk Ratio | 95% CI    |
|----------------------------|------|-------|-------------------------|--------------------|------------|-----------|
| <b>Sex</b>                 |      |       |                         |                    |            |           |
| Men                        | 797  | 26.36 | 84.69                   | 0.3884             | 1.00       |           |
| Women                      | 2226 | 73.64 | 83.38                   |                    | 0.98       | 0.95-1.02 |
| <b>Age Group</b>           |      |       |                         |                    |            |           |
| 18-39                      | 770  | 25.47 | 82.21                   | < 0.0001           | 1.00       |           |
| 40-49                      | 806  | 26.66 | 89.45                   |                    | 1.09       | 1.05-1.13 |
| 50-59                      | 1088 | 35.99 | 88.24                   |                    | 1.07       | 1.03-1.12 |
| 60-76                      | 359  | 11.88 | 60.45                   |                    | 0.74       | 0.67-0.80 |
| <b>Medical Cost (USD)</b>  |      |       |                         |                    |            |           |
| 0-184                      | 755  | 25.0  | 87.55                   | < 0.0001           | 1.00       |           |
| 185-604                    | 757  | 25.0  | 85.07                   |                    | 0.97       | 0.93-1.01 |
| 605-2049                   | 755  | 25.0  | 84.64                   |                    | 0.97       | 0.93-1.01 |
| 2050-7191                  | 454  | 15.0  | 79.30                   |                    | 0.91       | 0.86-0.96 |
| 7192+                      | 302  | 10.0  | 75.17                   |                    | 0.86       | 0.80-0.92 |
| <b>Pharmacy Cost (USD)</b> |      |       |                         |                    |            |           |
| 0-6                        | 759  | 25.0  | 86.92                   | < 0.0001           | 1.00       |           |
| 7-194                      | 755  | 25.0  | 85.21                   |                    | 0.99       | 0.69-1.03 |
| 195-903                    | 755  | 25.0  | 82.59                   |                    | 0.96       | 0.92-1.00 |
| 904-2303                   | 452  | 15.0  | 84.14                   |                    | 0.99       | 0.94-1.04 |
| 2304+                      | 302  | 10.0  | 74.92                   |                    | 0.86       | 0.80-0.93 |

Sex, age, medical and pharmacy costs apply to the 2010-11 academic year.

Table 2 Medical and pharmacy costs according to sex, age, year, and body mass index

|                          | BMI (kg/m <sup>2</sup> ) |      |     | Medical Cost (USD) |       |     | Median | Median one-way analysis | Pharmacy Cost (USD) |      |      | Median | Median one-way analysis |
|--------------------------|--------------------------|------|-----|--------------------|-------|-----|--------|-------------------------|---------------------|------|------|--------|-------------------------|
|                          | Mean                     | SD   | SNK | Mean               | SD    | SNK |        | p value                 | Mean                | SD   | SNK  |        | p value                 |
| Sex                      |                          |      |     |                    |       |     |        |                         |                     |      |      |        |                         |
| Men                      | 29.35                    | 5.80 | A   | 2869               | 10581 | A   | 373    | < 0.0001                | 725                 | 2324 | A    | 53     | < 0.0001                |
| Women                    | 27.26                    | 6.47 | B   | 3447               | 12049 | A   | 741    |                         | 963                 | 3550 | B    | 238    |                         |
| Age Group                |                          |      |     |                    |       |     |        |                         |                     |      |      |        |                         |
| 18-39                    | 27.17                    | 6.06 | A   | 2236               | 9344  | A   | 389    | < 0.0001                | 660                 | 3342 | A    | 70     | < 0.0001                |
| 40-49                    | 27.76                    | 6.42 | B   | 3052               | 12366 | B   | 503    |                         | 750                 | 2806 | A    | 106    |                         |
| 50-59                    | 28.05                    | 6.55 | B   | 3935               | 12579 | B   | 845    |                         | 1021                | 3288 | B    | 261    |                         |
| 60-76                    | 28.17                    | 6.13 | B   | 3749               | 10831 | B   | 989    |                         | 1288                | 3990 | C    | 344    |                         |
| Year                     |                          |      |     |                    |       |     |        |                         |                     |      |      |        |                         |
| 2010-11                  | 27.89                    | 6.40 | A   | 3188               | 10524 | A   | 605    | 0.2313                  | 830                 | 2247 | A    | 195    | 0.0016                  |
| 2011-12                  | 27.79                    | 6.31 | A   | 3621               | 12816 | A   | 610    |                         | 953                 | 3180 | A    | 189    |                         |
| 2012-13                  | 27.87                    | 6.59 | A   | 3208               | 11836 | A   | 670    |                         | 934                 | 3571 | A    | 173    |                         |
| 2013-14                  | 27.63                    | 6.16 | A   | 3191               | 11557 | A   | 651    |                         | 894                 | 3913 | A    | 141    |                         |
| BMI (kg/m <sup>2</sup> ) |                          |      |     |                    |       |     |        |                         |                     |      |      |        |                         |
| Underweight              |                          |      |     | 2191               | 1190  | A   | 647    | 0.0003                  | 1454                | 6706 | A    | 224    | 0.0004                  |
| Normal weight            |                          |      |     | 2826               | 333   | A   | 650    |                         | 779                 | 3285 | B    | 167    |                         |
| Overweight               |                          |      |     | 3174               | 514   | A   | 603    |                         | 926                 | 3085 | A, B | 169    |                         |
| Obese                    |                          |      |     | 3544               | 459   | A   | 665    |                         | 1031                | 3458 | A, B | 228    |                         |
| Morbidly obese           |                          |      |     | 6911               | 2092  | B   | 1033   |                         | 853                 | 1493 | A, B | 242    |                         |

SNK: Student-Newman-Keuls Test. Different letters in the SNK columns indicate significant difference among the levels of the variables at the 0.05 level.

Table 3 Risk of medical and pharmacy costs (USD) above the 50<sup>th</sup>, 75<sup>th</sup>, and 90<sup>th</sup> percentiles according to BMI weight classification, sex, and age

|                          | Medical                                        |           |                                                |           |                                                |           | Pharmacy                                       |           |                                                |           |                                                |           |
|--------------------------|------------------------------------------------|-----------|------------------------------------------------|-----------|------------------------------------------------|-----------|------------------------------------------------|-----------|------------------------------------------------|-----------|------------------------------------------------|-----------|
|                          | 50 <sup>th</sup> percentile<br>Above vs. below |           | 75 <sup>th</sup> percentile<br>Above vs. below |           | 90 <sup>th</sup> percentile<br>Above vs. below |           | 50 <sup>th</sup> percentile<br>Above vs. below |           | 75 <sup>th</sup> percentile<br>Above vs. below |           | 90 <sup>th</sup> percentile<br>Above vs. below |           |
|                          | Risk Ratio                                     | 95% CI    |
| Sex                      |                                                |           |                                                |           |                                                |           |                                                |           |                                                |           |                                                |           |
| Men                      | 1.00                                           |           | 1.00                                           |           | 1.00                                           |           | 1.00                                           |           | 1.00                                           |           | 1.00                                           |           |
| Women                    | 1.43                                           | 1.36-1.51 | 1.47                                           | 1.35-1.60 | 1.42                                           | 1.24-1.64 | 1.58                                           | 1.50-1.66 | 1.59                                           | 1.46-1.74 | 1.14                                           | 1.00-1.29 |
| Age Groups               |                                                |           |                                                |           |                                                |           |                                                |           |                                                |           |                                                |           |
| 18-39                    | 1.00                                           |           | 1.00                                           |           | 1.00                                           |           | 1.00                                           |           | 1.00                                           |           | 1.00                                           |           |
| 40-49                    | 1.16                                           | 1.08-1.23 | 1.15                                           | 1.03-1.29 | 1.08                                           | 0.90-1.28 | 1.14                                           | 1.07-1.22 | 1.45                                           | 1.29-1.64 | 1.72                                           | 1.37-2.15 |
| 50-59                    | 1.50                                           | 1.42-1.59 | 1.65                                           | 1.50-1.82 | 1.36                                           | 1.16-1.58 | 1.48                                           | 1.39-1.56 | 2.28                                           | 2.05-2.55 | 2.82                                           | 2.30-3.46 |
| 60+                      | 1.61                                           | 1.52-1.72 | 1.83                                           | 1.64-2.04 | 1.33                                           | 1.11-1.60 | 1.57                                           | 1.48-1.68 | 2.57                                           | 2.29-2.89 | 3.78                                           | 3.06-4.68 |
| BMI (kg/m <sup>2</sup> ) |                                                |           |                                                |           |                                                |           |                                                |           |                                                |           |                                                |           |
| Underweight              | 1.05                                           | 0.88-1.26 | 0.91                                           | 0.64-1.31 | 0.61                                           | 0.28-1.35 | 2.05                                           | 1.25-3.34 | 1.05                                           | 0.74-1.48 | 2.05                                           | 1.25-3.34 |
| Normal weight            | 1.00                                           |           | 1.00                                           |           | 1.00                                           |           | 1.00                                           |           | 1.00                                           |           | 1.00                                           |           |
| Overweight               | 0.95                                           | 0.90-1.00 | 0.95                                           | 0.86-1.05 | 1.01                                           | 0.85-1.20 | 1.01                                           | 0.95-1.06 | 1.18                                           | 1.07-1.30 | 1.68                                           | 1.41-2.00 |
| Obese                    | 1.00                                           | 0.95-1.06 | 1.14                                           | 1.03-1.25 | 1.21                                           | 1.01-1.43 | 1.11                                           | 1.05-1.17 | 1.19                                           | 1.08-1.31 | 1.76                                           | 1.47-2.12 |
| Morbidly obese           | 1.18                                           | 1.08-1.29 | 1.62                                           | 1.40-1.87 | 2.18                                           | 1.72-2.77 | 1.13                                           | 1.03-1.25 | 1.30                                           | 1.09-1.55 | 1.93                                           | 1.43-2.61 |

Shaded cells represent statistical significance at the 0.05 level.



Table 4 Medication use according to sex, age, and BMI weight classification

|                     |       | Sex   |       | Age Group |       |       |       | Body Mass Index (kg/m <sup>2</sup> ) |               |             |       |                |
|---------------------|-------|-------|-------|-----------|-------|-------|-------|--------------------------------------|---------------|-------------|-------|----------------|
|                     |       | Men   | Women | 18-39     | 40-49 | 50-59 | 60+   | Underweight                          | Normal weight | Over weight | Obese | Morbidly obese |
| Medication          | %     |       |       |           |       |       |       |                                      |               |             |       |                |
| Acid Reflux         | 5.75  | 5.56  | 5.81  | 3.02      | 4.54  | 7.14  | 8.36  | 3.57                                 | 4.34          | 5.36        | 7.19  | 9.14           |
| Risk ratio          |       | 1.00  | 1.04  | 1.00      | 1.50  | 2.36  | 2.77  | 0.82                                 | 1.00          | 1.24        | 1.66  | 2.11           |
| AF <sub>p</sub> (%) |       | 0.00  | 0.26  | 0.00      | 2.81  | 7.27  | 9.23  |                                      | 0.00          | 1.33        | 3.64  | 5.98           |
| Acne                | 7.17  | 3.15  | 8.62  | 7.15      | 7.03  | 7.16  | 7.40  | 9.82                                 | 8.81          | 6.64        | 6.34  | 6.18           |
| Risk ratio          |       | 1.00  | 2.74  | 1.00      | 0.98  | 1.00  | 1.03  | 1.11                                 | 1.00          | 0.75        | 0.72  | 0.70           |
| AF <sub>p</sub> (%) |       | 0.00  | 11.07 | 0.00      | 0.01  | 0.25  | 0.25  | 0.82                                 | 0.00          |             |       |                |
| Antibiotic          | 21.21 | 17.81 | 22.44 | 18.72     | 20.76 | 22.76 | 21.93 | 25.89                                | 20.54         | 20.74       | 23.73 | 21.24          |
| Risk ratio          |       | 1.00  | 1.26  | 1.00      | 1.11  | 1.22  | 1.17  | 1.26                                 | 1.00          | 1.01        | 1.16  | 1.03           |
| AF <sub>p</sub> (%) |       | 0.00  | 5.23  | 0.00      | 2.26  | 4.38  | 3.51  | 5.24                                 | 0.00          | 0.21        | 3.19  | 0.72           |
| Anticonvulsants     | 1.49  | 1.39  | 1.53  | 1.84      | 1.32  | 1.45  | 1.40  | 2.68                                 | 1.25          | 1.13        | 1.65  | 1.61           |
| Risk ratio          |       | 1.00  | 1.10  | 1.00      | 0.72  | 0.79  | 0.76  | 2.14                                 | 1.00          | 0.90        | 1.32  | 1.29           |
| AF <sub>p</sub> (%) |       | 0.00  | 0.15  | 0.00      |       |       |       | 1.68                                 | 0.00          |             | 0.47  | 0.43           |
| Antifungal          | 5.29  | 2.61  | 5.81  | 5.64      | 6.03  | 4.24  | 3.87  | 5.36                                 | 5.83          | 3.81        | 6.24  | 6.18           |
| Risk ratio          |       | 1.00  | 2.23  | 1.00      | 1.07  | 0.75  | 0.69  | 0.92                                 | 1.00          | 0.65        | 1.07  | 1.06           |
| AF <sub>p</sub> (%) |       | 0.00  | 6.09  | 0.00      | 0.36  |       |       |                                      | 0.00          |             | 0.37  | 0.32           |
| Anxiety             | 7.88  | 6.31  | 8.45  | 6.42      | 7.80  | 8.36  | 8.97  | 8.93                                 | 7.22          | 7.11        | 7.29  | 6.45           |
| Risk ratio          |       | 1.00  | 1.34  | 1.00      | 1.21  | 1.30  | 1.40  | 1.24                                 | 1.00          | 0.98        | 1.01  | 0.89           |
| AF <sub>p</sub> (%) |       | 0.00  | 2.60  | 0.00      | 1.67  | 2.33  | 3.03  | 1.83                                 | 0.00          |             | 0.08  |                |
| Arthritis           | 11.06 | 11.13 | 11.03 | 7.72      | 10.53 | 12.83 | 12.56 | 7.14                                 | 9.36          | 10.72       | 13.84 | 14.78          |
| Risk ratio          |       | 1.00  | 0.99  | 1.00      | 1.36  | 1.66  | 1.63  | 0.76                                 | 1.00          | 1.15        | 1.48  | 1.58           |
| AF <sub>p</sub> (%) |       | 0.00  |       | 0.00      | 3.87  | 6.82  | 6.48  |                                      | 0.00          | 1.58        | 5.03  | 6.02           |
| Asthma              | 8.61  | 7.19  | 9.13  | 7.48      | 8.80  | 8.00  | 11.22 | 6.25                                 | 6.24          | 8.74        | 10.39 | 10.75          |

1  
2  
3  
4  
5  
6  
7  
8  
9  
10  
11  
12  
13  
14  
15  
16  
17  
18  
19  
20  
21  
22  
23  
24  
25  
26  
27  
28  
29  
30  
31  
32  
33  
34  
35  
36  
37  
38  
39  
40  
41  
42  
43  
44  
45  
46  
47

|                        |       |       |       |       |       |       |       |       |       |       |       |       |
|------------------------|-------|-------|-------|-------|-------|-------|-------|-------|-------|-------|-------|-------|
| Risk ratio             |       | 1.00  | 1.27  | 1.00  | 1.18  | 1.07  | 1.50  | 1.00  | 1.00  | 1.40  | 1.67  | 1.72  |
| AF <sub>p</sub> (%)    |       | 0.00  | 2.27  | 0.00  | 1.50  | 0.59  | 4.13  | 0.01  | 0.00  | 3.33  | 5.42  | 5.86  |
| Birth Control          | 8.71  | 0.24  | 10.88 | 21.13 | 8.77  | 2.59  | 0.95  | 10.71 | 11.69 | 7.30  | 6.34  | 6.99  |
| Risk ratio             |       | 1.00  | 45.33 | 1.00  | 0.42  | 0.12  | 0.04  | 0.92  | 1.00  | 0.62  | 0.54  | 0.60  |
| AF <sub>p</sub> (%)    |       | 0.00  | 79.43 | 0.00  |       |       |       |       | 0.00  |       |       |       |
| Blood Thinner          | 1.26  | 1.85  | 1.05  | 3.91  | 18.75 | 45.31 | 32.03 | 0.95  | 0.52  | 1.15  | 2.08  | 5.22  |
| Risk ratio             |       | 1.00  | 0.57  | 1.00  | 4.80  | 11.59 | 8.19  | 1.83  | 1.00  | 2.21  | 4.00  | 10.04 |
| AF <sub>p</sub> (%)    |       | 0.00  |       | 0     | 4.56  | 11.77 | 8.31  | 1.03  | 0     | 1.50  | 3.64  | 10.22 |
| Bowel/Rectum           | 3.06  | 2.75  | 3.17  | 1.76  | 2.84  | 3.53  | 4.15  | 1.79  | 3.15  | 2.87  | 2.85  | 2.96  |
| Risk ratio             |       | 1.00  | 1.15  | 1.00  | 1.61  | 2.01  | 2.36  | 0.57  | 1.00  | 0.91  | 0.90  | 0.94  |
| AF <sub>p</sub> (%)    |       | 0.00  | 0.47  | 0.00  | 1.84  | 2.99  | 3.99  |       | 0.00  |       |       |       |
| Cold/Influenza/Allergy | 17.80 | 14.52 | 18.99 | 15.73 | 18.30 | 18.14 | 19.07 | 22.32 | 15.53 | 18.56 | 20.38 | 22.04 |
| Risk ratio             |       | 1.00  | 1.31  | 1.00  | 1.16  | 1.15  | 1.21  | 1.44  | 1.00  | 1.20  | 1.31  | 1.42  |
| AF <sub>p</sub> (%)    |       | 0.00  | 5.20  | 0.00  | 2.83  | 2.65  | 3.64  | 7.22  | 0.00  | 3.36  | 5.27  | 6.94  |
| Depression             | 18.24 | 10.28 | 21.14 | 12.51 | 19.30 | 20.75 | 18.84 | 15.18 | 16.20 | 17.59 | 20.83 | 18.55 |
| Risk ratio             |       | 1.00  | 2.06  | 1.00  | 1.54  | 1.66  | 1.51  | 0.94  | 1.00  | 1.09  | 1.29  | 1.15  |
| AF <sub>p</sub> (%)    |       | 0.00  | 16.16 | 0.00  | 9.01  | 10.73 | 8.45  |       | 0.00  | 1.54  | 4.95  | 2.58  |
| Diabetes               | 6.32  | 6.48  | 6.22  | 2.53  | 4.50  | 7.82  | 10.94 | 1.79  | 2.24  | 5.67  | 11.29 | 17.74 |
| Risk ratio             |       | 1.00  | 0.96  | 1.00  | 1.78  | 3.09  | 4.32  | 0.80  | 1.00  | 2.53  | 5.04  | 7.92  |
| AF <sub>p</sub> (%)    |       | 0.00  |       | 0.00  | 4.69  | 11.67 | 17.36 |       | 0.00  | 8.82  | 20.34 | 30.43 |
| Edema                  | 5.14  | 3.12  | 5.87  | 2.04  | 3.64  | 6.48  | 8.86  | 6.25  | 3.08  | 4.66  | 7.29  | 12.90 |
| Risk ratio             |       | 1.00  | 1.88  | 1.00  | 1.78  | 3.18  | 4.34  | 2.03  | 1.00  | 1.51  | 2.37  | 4.19  |
| AF <sub>p</sub> (%)    |       | 0.00  | 4.33  | 0.00  | 3.88  | 10.06 | 14.66 | 5.02  | 0.00  | 2.57  | 6.56  | 14.08 |
| Eye Infection          | 12.01 | 9.23  | 12.87 | 11.44 | 13.06 | 11.13 | 12.34 | 14.29 | 11.02 | 12.12 | 13.64 | 9.68  |
| Risk ratio             |       | 1.00  | 1.39  | 1.00  | 1.14  | 0.97  | 1.08  | 1.30  | 1.00  | 1.10  | 1.24  | 0.88  |
| AF <sub>p</sub> (%)    |       | 0.00  | 4.52  | 0.00  | 1.67  |       | 0.94  | 3.44  | 0.00  | 1.18  | 2.78  |       |
| Herpes                 | 6.30  | 3.26  | 6.86  | 4.82  | 7.24  | 6.12  | 4.71  | 1.79  | 7.66  | 7.22  | 4.20  | 1.88  |
| Risk ratio             |       | 1.00  | 2.10  | 1.00  | 1.50  | 1.27  | 0.98  | 0.23  | 1.00  | 0.94  | 0.55  | 0.25  |
| AF <sub>p</sub> (%)    |       | 0.00  | 6.50  | 0.00  | 3.07  | 1.67  |       |       | 0.00  |       |       |       |
| High Blood Pressure    | 16.49 | 19.95 | 15.60 | 4.58  | 11.05 | 22.78 | 29.39 | 6.25  | 8.54  | 17.44 | 24.68 | 31.99 |
| Risk ratio             |       | 1.00  | 0.78  | 1.00  | 2.41  | 4.97  | 6.42  | 0.73  | 1.00  | 2.04  | 2.89  | 3.75  |
| AF <sub>p</sub> (%)    |       | 0.00  |       | 0.00  | 18.89 | 39.59 | 47.18 |       | 0.00  | 14.66 | 23.76 | 31.17 |

|                     |       |       |       |       |       |       |       |       |       |       |       |       |
|---------------------|-------|-------|-------|-------|-------|-------|-------|-------|-------|-------|-------|-------|
| Inflammation        | 1.19  | 0.68  | 1.37  | 0.69  | 0.87  | 1.50  | 1.68  | 1.79  | 0.98  | 1.40  | 0.80  | 1.61  |
| Risk ratio          |       | 1.00  | 2.01  | 1.00  | 1.26  | 2.17  | 2.43  | 1.83  | 1.00  | 1.43  | 0.82  | 1.64  |
| AF <sub>p</sub> (%) |       | 0.00  | 1.19  | 0.00  | 0.31  | 1.38  | 1.68  | 0.97  | 0.00  | 0.51  |       | 0.76  |
| Insomnia            | 4.23  | 2.24  | 4.95  | 2.70  | 3.60  | 5.72  | 4.04  | 8.93  | 4.07  | 3.92  | 3.85  | 4.84  |
| Risk ratio          |       | 1.00  | 2.21  | 1.00  | 1.33  | 2.12  | 1.50  | 2.19  | 1.00  | 0.96  | 0.95  | 1.19  |
| AF <sub>p</sub> (%) |       | 0.00  | 4.87  | 0.00  | 1.39  | 4.52  | 2.06  | 4.81  | 0.00  |       |       | 0.79  |
| Muscle Spasms       | 4.34  | 3.53  | 4.64  | 3.11  | 4.57  | 4.93  | 4.37  | 5.36  | 3.29  | 4.27  | 5.44  | 6.99  |
| Risk ratio          |       | 1.00  | 1.31  | 1.00  | 1.47  | 1.59  | 1.41  | 1.63  | 1.00  | 1.30  | 1.65  | 2.12  |
| AF <sub>p</sub> (%) |       | 0.00  | 1.35  | 0.00  | 2.00  | 2.48  | 1.73  | 2.66  | 0.00  | 1.28  | 2.76  | 4.65  |
| Nausea/Vomiting     | 5.01  | 3.77  | 5.47  | 5.44  | 4.85  | 4.83  | 5.10  | 4.46  | 4.14  | 4.50  | 6.19  | 5.65  |
| Risk ratio          |       | 1.00  | 1.45  | 1.00  | 0.89  | 0.89  | 0.94  | 1.08  | 1.00  | 1.09  | 1.50  | 1.36  |
| AF <sub>p</sub> (%) |       | 0.00  | 2.21  | 0.00  |       |       |       | 0.39  | 0.00  | 0.43  | 2.42  | 1.79  |
| Opioids             | 17.04 | 15.98 | 17.42 | 14.14 | 16.29 | 18.62 | 18.73 | 17.86 | 13.39 | 15.77 | 20.28 | 27.69 |
| Risk ratio          |       | 1.00  | 1.09  | 1.00  | 1.15  | 1.32  | 1.32  | 1.33  | 1.00  | 1.18  | 1.51  | 2.07  |
| AF <sub>p</sub> (%) |       | 0.00  | 1.51  | 0.00  | 2.53  | 5.12  | 5.24  | 5.38  | 0.00  | 2.94  | 8.06  | 15.40 |
| Osteoporosis        | 1.21  | 0.07  | 1.63  | 0.00  | 0.17  | 1.30  | 4.37  | 0.89  | 1.56  | 1.20  | 0.85  | 0.00  |
| Risk ratio          |       | 1.00  | 23.29 | 1.00  |       |       |       | 0.57  | 1.00  | 0.77  | 0.54  | 0.00  |
| AF <sub>p</sub> (%) |       | 0.00  | 21.24 | 0.00  |       |       |       |       | 0.00  |       |       |       |
| Pain – non opioid   | 2.19  | 1.63  | 2.39  | 2.78  | 2.15  | 1.98  | 1.91  | 3.57  | 1.73  | 1.67  | 2.55  | 2.96  |
| Risk ratio          |       | 1.00  | 1.47  | 1.00  | 0.77  | 0.71  | 0.69  | 2.06  | 1.00  | 0.97  | 1.47  | 1.71  |
| AF <sub>p</sub> (%) |       | 0.00  | 1.01  | 0.00  |       |       |       | 2.28  | 0.00  |       | 1.03  | 1.53  |
| Skin                | 6.84  | 4.88  | 7.55  | 5.44  | 6.44  | 7.37  | 8.24  | 6.25  | 7.25  | 6.41  | 7.19  | 5.38  |
| Risk ratio          |       | 1.00  | 1.55  | 1.00  | 1.18  | 1.35  | 1.51  | 0.86  | 1.00  | 0.88  | 0.99  | 0.74  |
| AF <sub>p</sub> (%) |       | 0.00  | 3.61  | 0.00  | 1.24  | 2.37  | 3.40  |       | 0.00  |       |       |       |
| Statins             | 14.49 | 17.93 | 13.24 | 2.31  | 8.53  | 20.58 | 28.4  | 3.81  | 7.02  | 17.95 | 19.89 | 27.47 |
| Risk ratio          |       | 1.00  | 0.74  | 1.00  | 3.69  | 8.91  | 12.29 | 0.54  | 1.00  | 2.56  | 2.83  | 3.91  |
| AF <sub>p</sub> (%) |       | 0.00  |       | 0.00  | 28.07 | 53.40 | 62.07 |       | 0.00  | 18.41 | 20.99 | 29.68 |
| Stomach Acid        | 1.19  | 1.49  | 1.07  | 0.86  | 1.25  | 0.99  | 1.96  | 0.89  | 0.81  | 1.01  | 1.90  | 1.08  |
| Risk ratio          |       | 1.00  | 0.72  | 1.00  | 1.45  | 1.15  | 2.28  | 1.10  | 1.00  | 1.25  | 2.35  | 1.33  |
| AF <sub>p</sub> (%) |       | 0.00  |       | 0.00  | 0.54  | 0.18  | 1.50  | 0.12  | 0.00  | 0.29  | 1.58  | 0.40  |
| Teeth/Gums          | 0.43  | 0.37  | 0.46  | 0.37  | 0.35  | 0.43  | 0.67  | 0.00  | 0.27  | 0.43  | 0.35  | 0.27  |
| Risk ratio          |       | 1.00  | 1.24  | 1.00  | 0.95  | 1.16  | 1.81  | 0.00  | 1.00  | 1.59  | 1.30  | 1.00  |

|                         |       |       |       |       |       |       |       |       |       |       |       |       |
|-------------------------|-------|-------|-------|-------|-------|-------|-------|-------|-------|-------|-------|-------|
| AF <sub>p</sub> (%)     |       | 0.00  | 0.10  | 0.00  |       | 0.07  | 0.35  |       | 0.00  | 0.25  | 0.13  | 0.00  |
| Thyroid                 | 12.76 | 2.99  | 16.31 | 4.37  | 11.19 | 16.92 | 17.61 | 6.25  | 13.97 | 12.74 | 13.94 | 19.09 |
| Risk ratio              |       | 1.00  | 5.45  | 1.00  | 2.56  | 3.87  | 4.03  | 0.45  | 1.00  | 0.91  | 1.00  | 1.37  |
| AF <sub>p</sub> (%)     |       | 0.00  | 36.24 | 0.00  | 16.61 | 26.82 | 27.88 |       | 0.00  |       |       | 4.47  |
| Ulcers                  | 9.38  | 8.55  | 9.69  | 8.30  | 8.28  | 10.19 | 10.88 | 10.71 | 7.59  | 9.90  | 10.99 | 15.32 |
| Risk ratio              |       | 1.00  | 1.13  | 1.00  | 1.00  | 1.23  | 1.31  | 1.41  | 1.00  | 1.30  | 1.45  | 2.02  |
| AF <sub>p</sub> (%)     |       | 0.00  | 1.24  | 0.00  |       | 2.09  | 2.83  | 3.71  | 0.00  | 2.78  | 4.03  | 8.72  |
| Urinary Tract Infection | 3.01  | 0.20  | 4.44  | 3.39  | 3.08  | 3.45  | 3.25  | 6.25  | 3.83  | 2.83  | 3.50  | 3.76  |
| Risk ratio              |       | 1.00  | 22.20 | 1.00  | 0.91  | 1.02  | 0.96  | 1.63  | 1.00  | 0.74  | 0.91  | 0.98  |
| AF <sub>p</sub> (%)     |       | 0.00  | 38.95 | 0.00  |       | 0.05  |       | 1.87  | 0.00  |       |       |       |
| Vitamins/Minerals       | 2.07  | 0.71  | 2.57  | 2.49  | 1.73  | 1.88  | 2.47  | 0.00  | 2.07  | 1.28  | 1.75  | 5.38  |
| Risk ratio              |       | 1.00  | 3.62  | 1.00  | 0.69  | 0.76  | 0.99  | 0.00  | 1.00  | 0.62  | 0.85  | 2.60  |
| AF <sub>p</sub> (%)     |       | 0.00  | 5.14  | 0.00  |       |       |       |       | 0.00  |       |       | 3.20  |
| All prescriptions       | 80.87 | 71.40 | 84.32 | 71.52 | 78.45 | 85.24 | 88.00 | 83.93 | 81.46 | 81.28 | 83.47 | 86.29 |
| Risk ratio              |       | 1.00  | 1.18  | 1.00  | 1.10  | 1.19  | 1.23  | 1.03  | 1.00  | 1.00  | 1.02  | 1.06  |
| AF <sub>p</sub> (%)     |       | 0.00  | 12.77 | 0.00  | 7.27  | 13.43 | 15.71 | 2.39  | 0.00  |       | 1.96  | 4.58  |

AF<sub>p</sub>: Attributable fraction in the population. Shaded cells represent statistical significance at the 0.05 level. Cells that are left blank had a negative AF<sub>p</sub>. In these cases the preventive fraction ( $[\text{Risk Ratio} - 1] \times 100$ ) is more appropriate.

For peer review only

1  
2  
3  
4  
5  
6  
7  
8  
9  
10  
11  
12  
13  
14  
15  
16  
17  
18  
19  
20  
21  
22  
23  
24  
25  
26  
27  
28  
29  
30  
31  
32  
33  
34  
35  
36  
37  
38  
39  
40  
41  
42  
43  
44  
45  
46  
47

Figure 1. Median medical and pharmacy cost (USD) according to Body Mass Index weight classifications and age

For peer review only

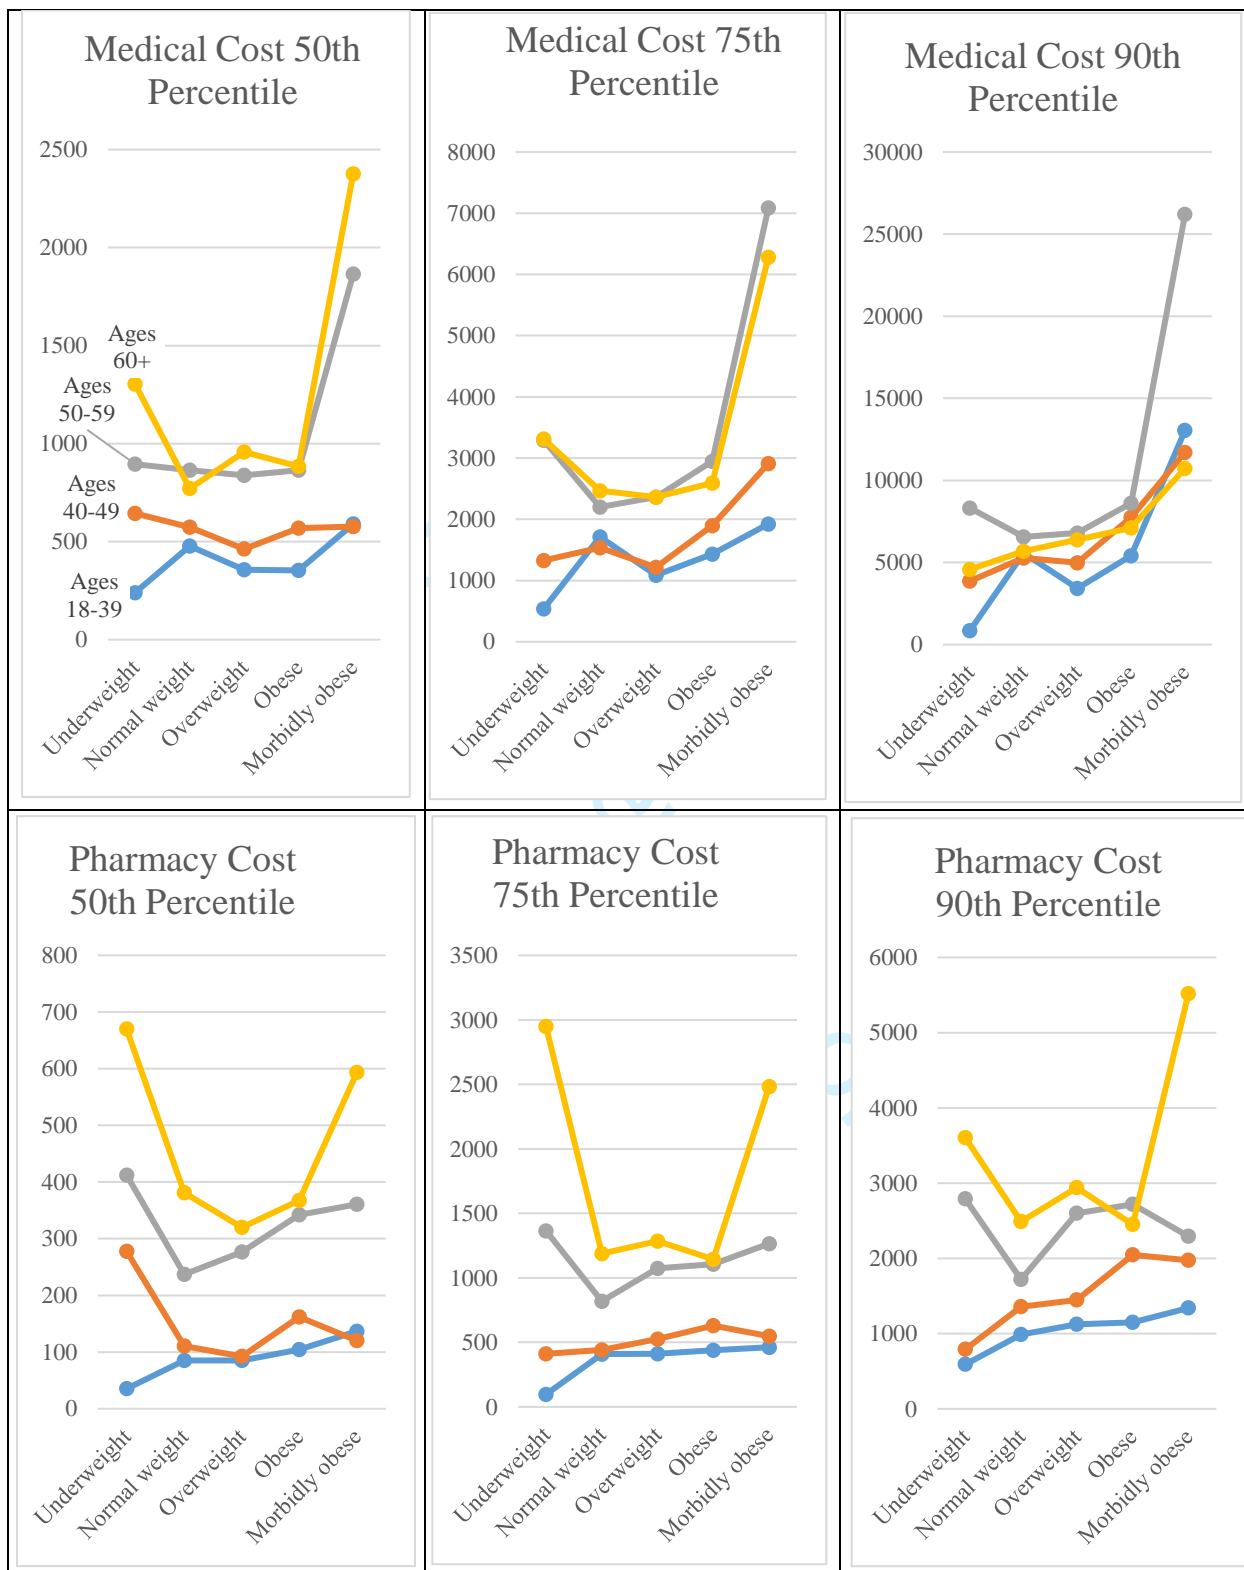

STROBE Statement—Checklist of items that should be included in reports of *cohort studies*

|                           | Item No | Recommendation                                                                                                                                                                                    | Page/line numbers |
|---------------------------|---------|---------------------------------------------------------------------------------------------------------------------------------------------------------------------------------------------------|-------------------|
| <b>Title and abstract</b> | 1       | (a) Indicate the study's design with a commonly used term in the title or the abstract                                                                                                            | 1/6, 2/25         |
|                           |         | (b) Provide in the abstract an informative and balanced summary of what was done and what was found                                                                                               | Done              |
| <b>Introduction</b>       |         |                                                                                                                                                                                                   |                   |
| Background/rationale      | 2       | Explain the scientific background and rationale for the investigation being reported                                                                                                              | Done              |
| Objectives                | 3       | State specific objectives, including any prespecified hypotheses                                                                                                                                  | Done              |
| <b>Methods</b>            |         |                                                                                                                                                                                                   |                   |
| Study design              | 4       | Present key elements of study design early in the paper                                                                                                                                           | Done              |
| Setting                   | 5       | Describe the setting, locations, and relevant dates, including periods of recruitment, exposure, follow-up, and data collection                                                                   | Done              |
| Participants              | 6       | (a) Give the eligibility criteria, and the sources and methods of selection of participants. Describe methods of follow-up                                                                        | Done              |
|                           |         | (b) For matched studies, give matching criteria and number of exposed and unexposed                                                                                                               | NA                |
| Variables                 | 7       | Clearly define all outcomes, exposures, predictors, potential confounders, and effect modifiers. Give diagnostic criteria, if applicable                                                          | Done              |
| Data sources/measurement  | 8*      | For each variable of interest, give sources of data and details of methods of assessment (measurement). Describe comparability of assessment methods if there is more than one group              | Done              |
| Bias                      | 9       | Describe any efforts to address potential sources of bias                                                                                                                                         | Done              |
| Study size                | 10      | Explain how the study size was arrived at                                                                                                                                                         | Done              |
| Quantitative variables    | 11      | Explain how quantitative variables were handled in the analyses. If applicable, describe which groupings were chosen and why                                                                      | Done              |
| Statistical methods       | 12      | (a) Describe all statistical methods, including those used to control for confounding                                                                                                             | Done              |
|                           |         | (b) Describe any methods used to examine subgroups and interactions                                                                                                                               | NA                |
|                           |         | (c) Explain how missing data were addressed                                                                                                                                                       | NA                |
|                           |         | (d) If applicable, explain how loss to follow-up was addressed                                                                                                                                    | NA                |
|                           |         | (e) Describe any sensitivity analyses                                                                                                                                                             | NA                |
| <b>Results</b>            |         |                                                                                                                                                                                                   |                   |
| Participants              | 13*     | (a) Report numbers of individuals at each stage of study—eg numbers potentially eligible, examined for eligibility, confirmed eligible, included in the study, completing follow-up, and analysed | Done              |
|                           |         | (b) Give reasons for non-participation at each stage                                                                                                                                              | NA                |
|                           |         | (c) Consider use of a flow diagram                                                                                                                                                                | NA                |
| Descriptive data          | 14*     | (a) Give characteristics of study participants (eg demographic, clinical, social) and information on exposures and potential confounders                                                          | Done              |
|                           |         | (b) Indicate number of participants with missing data for each variable of interest                                                                                                               | Done              |
|                           |         | (c) Summarise follow-up time (eg, average and total amount)                                                                                                                                       | Done              |
| Outcome data              | 15*     | Report numbers of outcome events or summary measures over time                                                                                                                                    | Done              |
| Main results              | 16      | (a) Give unadjusted estimates and, if applicable, confounder-adjusted estimates and their precision (eg, 95% confidence interval). Make clear                                                     | Done              |



|                          |    |                                                                                                                                                                            |      |
|--------------------------|----|----------------------------------------------------------------------------------------------------------------------------------------------------------------------------|------|
|                          |    | which confounders were adjusted for and why they were included                                                                                                             |      |
|                          |    | (b) Report category boundaries when continuous variables were categorized                                                                                                  | NA   |
|                          |    | (c) If relevant, consider translating estimates of relative risk into absolute risk for a meaningful time period                                                           | NA   |
| Other analyses           | 17 | Report other analyses done—eg analyses of subgroups and interactions, and sensitivity analyses                                                                             | Done |
| <b>Discussion</b>        |    |                                                                                                                                                                            |      |
| Key results              | 18 | Summarise key results with reference to study objectives                                                                                                                   | Done |
| Limitations              | 19 | Discuss limitations of the study, taking into account sources of potential bias or imprecision. Discuss both direction and magnitude of any potential bias                 | Done |
| Interpretation           | 20 | Give a cautious overall interpretation of results considering objectives, limitations, multiplicity of analyses, results from similar studies, and other relevant evidence | Done |
| Generalisability         | 21 | Discuss the generalisability (external validity) of the study results                                                                                                      | Done |
| <b>Other information</b> |    |                                                                                                                                                                            |      |
| Funding                  | 22 | Give the source of funding and the role of the funders for the present study and, if applicable, for the original study on which the present article is based              | Done |

\*Give information separately for exposed and unexposed groups.

**Note:** An Explanation and Elaboration article discusses each checklist item and gives methodological background and published examples of transparent reporting. The STROBE checklist is best used in conjunction with this article (freely available on the Web sites of PLoS Medicine at <http://www.plosmedicine.org/>, Annals of Internal Medicine at <http://www.annals.org/>, and Epidemiology at <http://www.epidem.com/>). Information on the STROBE Initiative is available at <http://www.strobe-statement.org>.

# BMJ Open

## To what extent does sex, age, and BMI impact medical and pharmacy costs? A retrospective cohort study involving employees in a large school district in the United States

|                                 |                                                                                                                |
|---------------------------------|----------------------------------------------------------------------------------------------------------------|
| Journal:                        | <i>BMJ Open</i>                                                                                                |
| Manuscript ID                   | bmjopen-2018-024078.R3                                                                                         |
| Article Type:                   | Research                                                                                                       |
| Date Submitted by the Author:   | 13-Mar-2019                                                                                                    |
| Complete List of Authors:       | Merrill, Ray; Brigham Young University, Public Health<br>Fowers, Rylan; Brigham Young University               |
| <b>Primary Subject Heading</b>: | Pharmacology and therapeutics                                                                                  |
| Secondary Subject Heading:      | Public health, Epidemiology                                                                                    |
| Keywords:                       | health risks, screening, prescription medication, health risk appraisal, body mass index, pharmaceutical costs |
|                                 |                                                                                                                |

SCHOLARONE™  
Manuscripts

1  
2  
3  
4  
5  
6  
7  
8  
9  
10  
11  
12  
13  
14  
15 **To what extent does sex, age, and BMI impact medical and pharmacy costs? A**  
16 **retrospective cohort study involving employees in a large school district in the United**  
17 **States**  
18  
19  
20  
21

22 Ray M. Merrill, PhD, MPH, Rylan P. Fowers, BS  
23  
24

25 Department of Public Health, College of Life Sciences, Brigham Young University  
26  
27  
28  
29  
30  
31  
32  
33  
34

35 Corresponding Author:

36 Ray M. Merrill

37 Department of Public Health

38 2063 Life Sciences Building

39 Provo, Utah 84602

40 Email: [Ray\\_Merrill@byu.edu](mailto:Ray_Merrill@byu.edu)

41 Telephone: 801-422-9788

42 Fax: 801-422-9363  
43  
44  
45  
46  
47  
48  
49  
50  
51

52 Keywords: body mass index, obesity, prevention, pharmaceuticals, screening  
53

54 Word count: 3527  
55  
56  
57  
58  
59  
60

1  
2  
3 **Objective** To identify the extent that sex, age, and body mass index (BMI) is associated with  
4 medical and pharmacy costs.  
5  
6

7  
8 **Design** Retrospective cohort.  
9

10 **Setting** A school district in the Western United States involving 2531 workers continuously  
11 employed during 2011-2014.  
12  
13

14 **Main outcome measures** Medical and pharmacy costs and BMI.  
15

16  
17 **Results** Approximately 84% of employees participated in wellness screening. Participants were  
18 1.03 (95% CI 1.01- 1.06) times more likely to be women and younger ( $M = 47.8$  vs.  $49.8$ ,  $p <$   
19  $0.001$ ). Median medical and pharmacy costs were higher for women than men, increased with  
20 age, and were greater in morbidly obese individuals ( $p < 0.001$ ). Annual pharmacy claims were  
21 18% more likely to be filed by women than men, 23% more likely filed by those aged  $\geq 60$  versus  
22  $< 40$  years, and 6% more likely filed by morbidly obese individuals than of normal weight ( $p <$   
23  $0.001$ ) individuals. Greater medical and pharmacy costs in older age were most pronounced in  
24 underweight and morbidly obese groups. Higher use of medication among women than men was  
25 primarily because of drugs involving birth control, osteoporosis, thyroid disease, and urinary  
26 tract infection. Higher medication use in older age was primarily related to medications used to  
27 treat gastrointestinal problems. Medication use was positively associated with BMI weight  
28 classifications for most of the 33 drug types considered, with exceptions involving birth control,  
29 herpes, and osteoporosis. A J-shape relationship was observed between BMI and medication use  
30 for acne, antibiotic, cold/influenza/allergy, eye infection, edema, muscle spasms, pain, and  
31 ulcers.  
32  
33  
34  
35  
36  
37  
38  
39  
40  
41  
42  
43  
44  
45  
46  
47  
48  
49  
50

51  
52 **Conclusions** Medications associated with higher medical and pharmacy costs among women,  
53 older age, and underweight or obese individuals are identified. Lowering medical and pharmacy  
54  
55  
56  
57  
58  
59  
60

1  
2  
3 costs requires weight management in older ages, particularly for underweight and obese. Higher  
4  
5 pharmacy costs for certain drugs among underweight individuals may be associated with poorer  
6  
7 nutrition.  
8  
9  
10  
11

12 Strengths and limitations of this study

- 13  
14  
15 • A large cohort of employees was available for retrospective assessment of the  
16 association between sex, age, and BMI with medical and pharmacy costs.  
17  
18 • The association between sex, age, and 33 specific types of medication were assessed,  
19 some of which have not been previously considered.  
20  
21 • All active employees received employer-sponsored medical and pharmacy coverage,  
22 and above 84% had information that allowed us to determine body mass.  
23  
24 • A few medications may have contributed to weight gain, which we were unable to  
25 adjust for in the current study.  
26  
27 • The study population and patterns of prescription drug use may limit generalization of  
28 the results.  
29  
30  
31  
32  
33  
34  
35  
36  
37  
38  
39  
40  
41  
42  
43  
44  
45  
46  
47  
48  
49  
50  
51  
52  
53  
54  
55  
56  
57  
58  
59  
60

## Introduction

Many companies offer wellness-screening programs consisting of health risk assessment and biometric screening. The 2016 Employer Health Benefits Survey found that among large firms (200 or more employees) in the United States, 59% offered health risk assessment (of which 32% had an incentive component) and 53% offered biometric screening (of which 31% included an incentive component).<sup>1</sup> These programs are intended to promote a greater sense of personal responsibility for lifestyle choices, identify the need for health behavior change, reduce future health problems, encourage patient management of existing health problems, decrease worker absenteeism, and improve job satisfaction and worker productivity.<sup>2-7</sup> Larger companies are also required to offer employer-sponsored medical and pharmacy coverage for their employees. Hence, information obtained on the health risk assessment and screenings can be compared with the medical and pharmacy costs.

Medical and pharmacy costs are influenced by a number of factors, including sex, age, and Body Mass Index (BMI).<sup>8-10</sup> Although medical costs are often a response to acute and chronic health conditions, pharmaceutical costs are often used to prevent more serious health problems. For example, antihypertensive medication, or statins, are useful in preventing cardiovascular disease;<sup>11-13</sup> multivitamins or folic acid for preventing congenital abnormalities;<sup>14</sup> aspirin and non-steroidal anti-inflammatory for preventing colorectal cancer;<sup>15</sup> bronchodilators, steroids, and anti-inflammatories for managing asthma;<sup>16</sup> and nonsteroidal anti-inflammatory drugs, steroids, analgesics, and immunosuppressive drugs for managing arthritis.<sup>17</sup> Consequently, wellness screening may actually increase use of prescription medication.<sup>18</sup>

1  
2  
3 Although a person's body weight may be associated with increased risk for various  
4 chronic health conditions and poorer health-related quality of life,<sup>19 20</sup> only in the last 15 years or  
5 so has its impact on healthcare expenditures been assessed.<sup>10</sup> Further, only a small number of  
6 studies have explored the association between body weight and prescription drug use. A study  
7 conducted in England found that overweight and obese individuals were more likely to receive  
8 medication for the cardiovascular system; gastrointestinal system; respiratory system; central  
9 nervous system; endocrine system; gynecology/urinary disorders; musculoskeletal and joint  
10 disorders; infections; eye, ear and oropharynx problems; and skin disorders.<sup>21</sup> A study in Sweden  
11 showed that use and cost of medication in general are significantly greater in obese individuals.<sup>22</sup>  
12 A study in the United States found that obesity was responsible for \$7 billion in Medicare  
13 prescription drug costs in 2006.<sup>23</sup> Another study conducted in the United States identified  
14 increased medication use during 1988 through 2012, with the increase most prominent among  
15 obese individuals.<sup>24</sup> A large cross-sectional study of 9789 adults in the National Health and  
16 Nutrition Examination Survey (NHANES) found that obese individuals utilize several  
17 prescription drugs (e.g., hypertension, lipid-lowering, and diabetes medications) more frequently  
18 than normal weight individuals.<sup>25</sup> Another study based on NHANES data found that while  
19 medication use increased over time for obese individuals compared with normal weight  
20 individuals ages 40 years and older, the increase was only marginal for those aged 25-39 years.<sup>26</sup>  
21 One study found that obese individuals used more analgesic, asthma, cardiovascular, diabetes,  
22 intranasal allergic rhinitis, thyroid, and ulcer medications.<sup>27</sup>  
23  
24  
25  
26  
27  
28  
29  
30  
31  
32  
33  
34  
35  
36  
37  
38  
39  
40  
41  
42  
43  
44  
45  
46  
47  
48

49 The purpose of the current study was to identify the extent to which sex, age, and BMI  
50 weight classifications are associated with medical and pharmacy costs among a large group of  
51 teachers, administrators, and other school staff. These associations are also evaluated for 33 more  
52  
53  
54  
55  
56  
57  
58  
59  
60

1  
2  
3 commonly prescribed medications.<sup>28</sup> Although studies have previously looked at the association  
4 between BMI and prescription medications, we evaluated some drugs that have not been  
5  
6 formerly considered, and the breadth of drugs covered is greater than in past studies. In addition,  
7  
8 evaluating the effect of being underweight on medical and pharmacy costs, and on specific drug  
9  
10 types, is unique to this study.  
11  
12  
13  
14  
15

## 16 **Methods**

### 17 *Patient and Public Involvement*

18  
19 A retrospective cohort study was conducted that associated sex, age, and BMI with medical and  
20  
21 pharmacy cost data for employees of a large school district in the western United States. Specific  
22  
23 patients and or the general public was not involved in this study. Body mass index was obtained  
24  
25 from those employees who participated in wellness screening. Employer-sponsored insurance  
26  
27 was available to all employees. The school district comprised six high schools, eight junior high  
28  
29 schools, and 31 elementary schools. Employees consisted of approximately three teachers to  
30  
31 every one staff member (cooks, bus drivers, grounds keepers, maintenance workers,  
32  
33 administrators, clerical workers, etc.). We were not provided specific job type and salary for each  
34  
35 employee. However, we can assume that the teachers, administrators, counselors, and nurses,  
36  
37 who represent almost all of the employees, had at least a college degree, that their salaries are  
38  
39 commensurate with other school districts, and that the employer-sponsored insurance coverage  
40  
41 was not strongly impacted by the employee's income or education.  
42  
43  
44  
45  
46  
47  
48

49 The study involved the academic years 2010-11, 2011-12, 2012-13, and 2013-14.  
50  
51 Employees were offered wellness screenings (personal health risk assessment [HRA] and  
52  
53 biometric evaluation) each fall. Medical and pharmacy claims data were also obtained for the  
54  
55  
56  
57  
58  
59  
60



1  
2  
3 employees in each academic year. Wellness screening and claims data were combined with a file  
4  
5 of eligible employees and assessed within each academic year. The eligibility file contained  
6  
7 information on current employment, sex, age, and year.  
8  
9

### 10 11 12 *Wellness Screening* 13

14  
15 All employees were offered wellness screening. Although participation was voluntary, it  
16  
17 was promoted through incentives. The HRA involved 36 questions. Biometric screenings  
18  
19 involved measurements of body mass index (BMI kg/m<sup>2</sup>), blood pressure (mm Hg), cholesterol  
20  
21 (mg/dL), and glucose (mg/dL). The HRA and biometric screenings were provided at no cost to  
22  
23 the employees, and were made available on location or with a personal physician. A health nurse  
24  
25 or physician assisted the employee in interpreting their HRA and screening results, in order to  
26  
27 help guide their need for lifestyle changes and control measures. The current study only  
28  
29 considers BMI. Weight classifications are based on commonly accepted ranges of BMI, as  
30  
31 follows: underweight (BMI < 18.5), normal weight (BMI 18.5-24), overweight (BMI 25-29),  
32  
33 obese (BMI 30-39), and morbidly obese (BMI 40+).  
34  
35  
36  
37  
38  
39

### 40 41 *Medical and Pharmacy Claims Data* 42

43 All active employees received employer-sponsored medical and pharmacy coverage, for  
44  
45 themselves and their families. The school district is fully insured with a retained-retention  
46  
47 agreement that makes the plan act very much like a self-funded health plan. Each month the  
48  
49 district pays a health insurance premium for the cost of healthcare and a small premium for  
50  
51 reinsurance of catastrophic claims. Catastrophic claims greater than \$250,000 are reinsured by a  
52  
53 stop loss policy and are not paid for by the school district. Employee pharmacy data do not  
54  
55  
56  
57  
58  
59

1  
2  
3 include over-the-counter drugs, but only those medications requiring a prescription. In the United  
4  
5 States, a drug is sold over-the-counter if the Food and Drug Administration deems it as  
6  
7 sufficiently safe and effective. These medications are not included in the current study. Further,  
8  
9 medical and pharmacy cost represents the amount paid by the insurance company as well as  
10  
11 copays by the employee.  
12  
13  
14  
15  
16

### 17 *Statistical Techniques*

18  
19 Counts, means, standard deviations, medians, and percentages were used to describe the  
20  
21 study population. Pair-wise comparisons of means were evaluated for statistical significance  
22  
23 using the Student-Newman-Keuls Test. Risk ratios compare having a medical and pharmacy cost  
24  
25 above the 50<sup>th</sup> percentile (vs. below), 75<sup>th</sup> percentile (vs. below), and 90<sup>th</sup> percentile (vs. below).  
26  
27 Statistical significance was determined by the corresponding 95% confidence intervals. For  
28  
29 selected medications, the risk of medication use was compared using risk ratios and attributable  
30  
31 fraction percentages across the levels of sex, age, and BMI weight classifications. Statistical  
32  
33 significance of differences in percent use of selected medications across sex, age, and BMI  
34  
35 categories was based on two-sided tests of significance were based on the 0.05 level against a  
36  
37 null hypothesis of no association. Data was evaluated using the statistical software package PC-  
38  
39 SAS (version 9.4; SAS Institute, Inc., 2014).  
40  
41  
42  
43  
44  
45  
46

### 47 **Results**

48  
49 In 2010-11, there were 3023 eligible employees, of which 2531 (83.72%) remained employed  
50  
51 through the academic year 2013-14. Those more likely to remain employed over the study period  
52  
53 were 40-59 years of age and had lower medical and pharmacy costs (Table 1). In 2010-11, ages  
54  
55  
56  
57  
58  
59  
60

1  
2  
3 ranged from 18-76, with mean age significantly younger for those who remained employed (46.9  
4 vs. 49.2,  $p < 0.0001$ ). Those who stayed with the school district had significantly lower mean  
5 medical costs (\$3056 vs. \$7887,  $p < 0.0001$ ) and mean pharmacy costs (\$859 vs. \$1105,  $p$   
6 =0.0387). The results of this study are based on those continuously employed over the four  
7 academic years.  
8  
9  
10  
11  
12  
13  
14

15 Most employees participated in annual wellness screening (84.1% in 2010-11, 84.4% in  
16 2011-12, 87.6% in 2012-13, and 80.7% in 2013-14). In 2010-11, there was no significant  
17 difference in mean medical cost between those who participated in wellness screening and those  
18 who did not (\$3148 vs. \$2571,  $p = 0.2900$ ). However, median medical cost was significantly  
19 greater for those who participated in wellness screening (\$588 vs. \$470,  $p = 0.0454$ ). For all  
20 academic years, women were 1.03 (95% CI 1.01- 1.06) times more likely than men to complete  
21 annual wellness screenings, after adjusting for age and academic year. Participants in wellness  
22 screening were significantly younger ( $M = 47.8$  vs. 49.8,  $p < 0.0001$ ), after adjusting for sex and  
23 year. Those participating in wellness screening had significantly lower mean medical cost  
24 (\$3093 vs. \$4181,  $p = 0.0013$ ), but experienced no significant difference in mean annual  
25 pharmacy costs, after adjusting for age, sex, and year.  
26  
27  
28  
29  
30  
31  
32  
33  
34  
35  
36  
37  
38  
39  
40

41 Among participants in annual wellness screening, mean BMI remained constant across  
42 the academic years (Table 2). Mean BMI was greater for men than women and in ages 40 years  
43 and older. Medical and pharmacy costs were highly positively skewed, with considerable  
44 variability. Hence, identifying significant differences in the mean costs across the levels of sex,  
45 age, and year, were less likely to occur than to find significant differences in the median costs  
46 across the levels of these variables. Medical costs were higher for women than men, increased  
47  
48  
49  
50  
51  
52  
53  
54  
55  
56  
57  
58  
59  
60

1  
2  
3 with age, and were greater in morbidly obese individuals. Pharmacy costs were higher in women  
4  
5 than men, increased with age, and were lowest in those of normal weight.  
6  
7

8  
9 The risk of medical and pharmacy costs above the 50<sup>th</sup>, 75<sup>th</sup>, and 90<sup>th</sup> percentiles are  
10 shown according to sex, age, and BMI weight classification in Table 3. Higher BMI has a greater  
11 impact on higher percentiles of medical and pharmacy costs. For example, morbidly obese  
12 compared with normal weight are 1.13 (13%), 1.30 (30%), and 1.93 (93%) more likely to have  
13 pharmacy costs above the 50<sup>th</sup>, 75<sup>th</sup>, and 90<sup>th</sup> percentiles, respectively. Medical and pharmacy  
14 costs above these percentiles are greater in women than men and increase with age.  
15  
16  
17  
18  
19  
20  
21  
22

23 Associations between selected percentiles of medical and pharmacy costs and BMI  
24 weight classifications varied according to age (Figure 1), but not sex (data not shown). Greater  
25 medical and pharmacy costs with older age groups are seen in the graph. However, the  
26 increasing costs with higher age are most pronounced in the underweight and morbidly obese  
27 groups.  
28  
29  
30  
31  
32  
33  
34

35 Medication use is shown across sex, age, and BMI groups in Table 4. For any  
36 medication, women were 18% more likely to file a claim than men, employees 60 years of age or  
37 older were 23% more likely to file a claim than those less than 40 years, and morbidly obese  
38 were 6% more likely to file a claim than those of normal weight. For 22 of the 33 medications  
39 considered, the percentage of annual claims was higher for women than men. For high blood  
40 pressure and statins was the percentage of claims greater for men than women. For 25 of the  
41 medications, the percentage of annual claims increased with age. For 24 of the medications, the  
42 percentage of annual claims was associated with BMI (20 positively and 4 negatively). The  
43 strongest positive associations involved diabetes, high cholesterol (statins), blood thinners, high  
44 blood pressure, and edema. Negative associations involved acne, birth control, Herpes, and  
45  
46  
47  
48  
49  
50  
51  
52  
53  
54  
55  
56  
57  
58  
59  
60

1  
2  
3 osteoporosis. The highest annual percent of acne, antibiotic, cold/influenza/allergy, and eye  
4  
5 infection medications occurred in underweight individuals. For edema, muscle spasms, pain, and  
6  
7 ulcers, medication use was comparatively high in underweight individuals, dropped for normal  
8  
9 weight, and then increased in higher weight classifications.  
10  
11  
12

13 We also report the attributable fraction in the population. For example, this statistic says  
14  
15 that 8.82% of diabetes medication is attributed to being overweight, 20.34% is attributed to being  
16  
17 obese, and 30.43% is attributed to being morbidly obese. Where the risk ratio is less than 1, the  
18  
19 preventive fraction can be estimated. For example, the risk of requiring osteoporosis medication  
20  
21 is lower for obese compared with normal weight employees (i.e., Risk Ratio = 0.54). The  
22  
23 corresponding preventive fraction is 66%, meaning in the absence of obesity there would be 66%  
24  
25 fewer claims for osteoporosis medication. The attributable fraction in the population and the  
26  
27 preventive fraction both assume a cause-and-effect association between exposure and disease.  
28  
29  
30  
31  
32  
33

## 34 **Discussion**

35  
36 The current study identified the degree to which sex, age, and BMI are associated with medical  
37  
38 and pharmacy costs among employees in a large school district. Associations were also evaluated  
39  
40 for 33 commonly prescribed medications.<sup>28</sup> The study extends previous research by including  
41  
42 certain medications not previously evaluated and considering associations for all BMI weight  
43  
44 classifications.  
45  
46  
47

48 Higher medical and pharmacy costs among women, in older age, and among those not of  
49  
50 normal weight is consistent with previous research.<sup>8-10</sup> Greater medical and pharmacy costs with  
51  
52 older age are most pronounced in the underweight and morbidly obese groups. Hence, weight  
53  
54  
55  
56  
57  
58  
59  
60

1  
2  
3 management at older ages appears particularly important in terms of lowering medical and  
4  
5 pharmacy costs.  
6  
7

8 Higher medication use in women than men was primarily because of drugs involving  
9  
10 birth control, osteoporosis, thyroid disease, and urinary tract infection. Prescription costs for  
11  
12 vitamins/minerals were also noticeably higher in women than men. Family planning and prenatal  
13  
14 care may explain the greater use of birth control medications and vitamins/minerals among  
15  
16 women. Loss of estrogen in women at older ages and female reproductive hormones may  
17  
18 contribute to the higher level of osteoporosis and thyroid disease in women.<sup>29 30</sup>  
19  
20  
21  
22

23 Medication use was higher in those aged 60 years and older compared with those younger  
24  
25 than 40, primarily because of diabetes, edema, high blood pressure, high cholesterol (statins),  
26  
27 and thyroid disease. Previous research has shown that the risk of these diseases increase with  
28  
29 age.<sup>31-35</sup> Medication use also noticeably increased with age for acid reflux, bowel/rectum,  
30  
31 inflammation, and stomach acid. This is consistent with older age tending to be associated with  
32  
33 more gastrointestinal problems.<sup>36</sup>  
34  
35  
36

37 Medication use was highest in those who were morbidly obese. We found positive  
38  
39 associations between body weight and higher use of medications for treating acid reflux, fungus,  
40  
41 bacterial infections, arthritis, asthma, colds, influenza, allergies, depression, diabetes, edema,  
42  
43 high blood pressure, muscle spasms, nausea/vomiting, pain, high cholesterol, stomach acid,  
44  
45 thyroid, and ulcers. Other studies have identified a similar associations.<sup>21 24 25 27</sup> Morbidly obese  
46  
47 individuals were also more likely to be prescribed vitamins and minerals than normal weight  
48  
49 individuals. We did not find an association between body weight and increased use of  
50  
51 medication for the bowel/rectum, skin, or urinary tract, which was counter to that found in other  
52  
53 studies.<sup>21 37-39</sup> We also assessed but did not find a significant association for medications used to  
54  
55  
56  
57  
58  
59  
60

1  
2  
3 treat anxiety, insomnia, convulsions, or teeth and gums. The insignificant finding for  
4 anticonvulsants and teeth and gums may be because of insufficient power (i.e., small numbers).  
5  
6 Finally, we assessed the association between body weight and medications for birth control,  
7 herpes, and osteoporosis, wherein significant negative associations were found. We are not  
8 aware of other studies that have looked at the association between body weight and medications  
9 used for colds, influenza, depression, edema, birth control, herpes, or osteoporosis.

10  
11  
12  
13  
14  
15  
16  
17 Greater use of medication to treat acid reflux or stomach acid among individuals with  
18 higher BMI is consistent with previous research showing hospitalization rates for reflux disease  
19 to be positively associated with BMI.<sup>40 41</sup> Another study found that higher BMI was associated  
20 with increased gastroesophageal reflux in both normal and overweight individuals.<sup>42</sup> Heavier  
21 body weight can add pressure to the stomach and diaphragm, thereby resulting in reflux. Further,  
22 increased use of medication for nausea/vomiting among individuals with higher BMI weight  
23 classifications is consistent with other research.<sup>43</sup>

24  
25  
26  
27  
28  
29  
30  
31  
32  
33  
34 The positive association between higher BMI and increased use of medication for ulcers  
35 is consistent with other research, particularly peptic (gastric and duodenal) ulcers.<sup>44 45</sup> The  
36 mechanism to explain the association between obesity and peptic ulcer disease remains unclear.  
37  
38 Obesity is also associated with *Helicobacter pylori*, which has been linked with gastric ulcers.<sup>46</sup>

39  
40  
41  
42  
43  
44 Previous research has shown that overweight and obese individuals are at greater risk for  
45 infections.<sup>37-49</sup> This is consistent with our findings that show increased use of antibiotics and  
46 medication for acne, colds/influenza/allergy, and eye infections among obese individuals.  
47  
48 However, it has been shown previously that antibiotics can also weaken the immune system,<sup>50</sup> as  
49 well as lead to obesity.<sup>51</sup> Some inflammatory diseases known to be associated with obesity in  
50 which we found a positive association between obesity and medication included influenza,<sup>52 53</sup>

1  
2  
3 heart disease,<sup>54</sup> diabetes,<sup>55</sup> allergies,<sup>56-59</sup> asthma,<sup>60</sup> edema,<sup>61-63</sup> and arthritis.<sup>64-67</sup> A compromised  
4  
5 immune system may also trigger autoimmune diseases, including rheumatoid arthritis and  
6  
7 thyroid disease,<sup>68</sup> as indicated in the current study.

10  
11 Overweight and obese individuals were more likely to receive cold, influenza, or allergy  
12  
13 medication. Obesity is associated with impaired immune response to influenza vaccination in  
14  
15 humans.<sup>69</sup> Because vaccination is less successful for obese individuals,<sup>70 71</sup> a greater level of  
16  
17 medication may be sought for treating colds, influenza, and allergies.

20  
21 Overweight and obese individuals received higher levels of pain medication. Research  
22  
23 indicates that the nature of the relationship between higher BMI and pain is likely indirect.<sup>72</sup> For  
24  
25 example, greater body weight is associated with osteoarthritis, which, in turn, leads to pain.<sup>73</sup>  
26  
27 Being overweight or obese may result in greater risk for back pain, joint pain, and muscle  
28  
29 spasms.<sup>74</sup> One study also found that obese individuals were more sensitive than those of normal  
30  
31 weight to pressure pain.<sup>75</sup>

34  
35 We found that higher BMI was associated with depression medication, as consistent with  
36  
37 previous research.<sup>76-79</sup> In one study, the age-adjusted level of depression among adults (ages 20  
38  
39 and older) in the United States was 43.2% for those with depression compared with 33.0% for  
40  
41 those without depression.<sup>80</sup> It may be that higher use of prescription medication for depression  
42  
43 among those with greater BMI is partly because these people are more likely to experience other  
44  
45 conditions related to depression, such as heart disease and diabetes.<sup>81-83</sup>

48  
49 There was more use of vitamins/minerals among morbidly obese employees. Of the  
50  
51 prescribed vitamins/minerals only 8.0% involved vitamin B and 57.3% involved vitamin D. A  
52  
53



1  
2  
3 previous study showed an association between low vitamin B12 and being obese.<sup>84</sup> Another  
4  
5 study found that the prevalence of vitamin D deficiency was 35% greater in obese individuals.<sup>85</sup>  
6  
7

8  
9 Acne, antibiotic, cold/influenza/allergy, and eye infection medications were prescribed  
10 more often for underweight individuals. This is consistent with underweight individuals having  
11 poorer nutrition and, consequently, a weakened immune system.<sup>86</sup> For edema, muscle spasms,  
12 pain, and ulcers, medication use showed a J-shape relationship with BMI weight classification.  
13 Poor nutrition may also explain the higher levels of medication use among underweight  
14 individuals for these medications. Despite mean medical costs being similar for those who  
15 participated in wellness screening during the first year of the study, over the four academic years,  
16 participants in wellness screening ended up having significantly lower mean medical costs.  
17 However, pharmacy costs did not go down. It has been shown that wellness screening can cause  
18 the number and cost of pharmaceuticals to go up, at least initially, as the need for treatment is  
19 identified.<sup>87</sup> Identified treatment needs can then, in turn, help prevent more costly health  
20 problems in the future. For example, medications used to treat high blood pressure can result in  
21 lowering the risk of diabetes, heart disease, stroke and kidney disease; treatment of insomnia can  
22 help lower the risk of irritability, depression or anxiety, difficulty paying attention, and accidents  
23 due to increased errors; treatment of high cholesterol with statins can help lower the risk of  
24 cardiovascular disease; treatment of oral infections can help reduce the risk of diabetes,  
25 cardiovascular disease, and preterm birth; and vitamins/minerals can help prevent a host of  
26 diseases (scurvy, rickets, anemia, neural tube defects, pellagra, etc.). High blood pressure and  
27 statin medications were among the highest prescribed in our study.  
28  
29  
30  
31  
32  
33  
34  
35  
36  
37  
38  
39  
40  
41  
42  
43  
44  
45  
46  
47  
48  
49  
50  
51

52 A limitation of this study involves external validity (generalizability). Specifically, the  
53 study only considered those individuals who remained employed over all four academic years.  
54  
55  
56  
57  
58  
59  
60

1  
2  
3 These people were generally healthier and in the age range 40-59. The study also focused on  
4 those who completed wellness screening because they contained BMI information. These  
5 employees were more likely women and younger. In addition, the causal direction between  
6 medication use and BMI could not be determined. That is, some medications may have  
7 contributed to body mass whereas others were in response to body mass. Finally, the current  
8 study did not have information on the use of vitamins or minerals obtained over the counter and  
9 small numbers made it impossible to evaluate the relationship between specific types of  
10 vitamins/minerals and sex, age, and BMI.  
11  
12  
13  
14  
15  
16  
17  
18  
19  
20  
21  
22  
23  
24

## 25 **Conclusion**

26  
27  
28 Weight management at older ages, particularly in underweight and morbidly obese individuals, is  
29 most important for lowering medical and pharmacy costs. Medical costs decreased, possibly  
30 because of effective drug treatment and prevention. Pharmacy costs remained constant, possibly  
31 because screening identified a need for certain medications. Greater use of medication among  
32 women than men is primarily because of drugs involving birth control, osteoporosis, thyroid  
33 disease, and urinary tract infection. Greater medication use in older age is primarily related to  
34 medications used to treat gastrointestinal problems. Medication use was positively associated  
35 with BMI for most of the conditions being treated, with exceptions involving birth control,  
36 herpes, and osteoporosis. A J-shape relationship between BMI weight classification and  
37 medication use for acne, antibiotic, cold/influenza/allergy, eye infection, edema, muscle spasms,  
38 pain, and ulcers may be because of poorer nutrition in underweight individuals.  
39  
40  
41  
42  
43  
44  
45  
46  
47  
48  
49  
50  
51  
52  
53  
54  
55  
56  
57  
58  
59  
60

## References

1. 2016 Employer Health Benefits Survey. kff.org. <http://www.kff.org/health-costs/report/2016-employer-health-benefits-survey/>. Published September 14, 2016. Accessed February 21, 2018.
2. Chen L, Hannon PA, Laing SS, Kohn MJ, Clark K, Pritchard S, Harris JR. Perceived workplace health support is associated with employee productivity. *Am J Health Promot.* 2015;29(3):139-146.
3. Centers for Disease Control and Prevention. cdc.gov. <http://www.cdc.gov/sustainability/worksitewellness/> Worksite wellness. Updated December 9, 2014. Accessed March 18, 2018.
4. Michaels CN, Greene AM. Worksite wellness: increasing adoption of workplace health promotion programs. *Health Promot Pract.* 2013;14(4):473-479.
5. Witt LB, Olsen D, Ablah E. Motivating factors for small and midsized businesses to implement worksite health promotion. *Health Promot Pract.* 2013;14(6), 876-884.
6. Niessen MA, Kraaijenhagen RA, Dijkgraaf MG, van Pelt D, van Kalken CK, Peek N. Impact of a Web-based worksite health promotion program on absenteeism. *J Occup Environ Med.* 2012;54(4):404-408.
7. Kaspin LC, Gorman KM, Miller RM. Systematic review of employer-sponsored wellness strategies and their economic and health-related outcomes. *Popul Health Manag.* 2013;16(1): 14-21.
8. Metge C, Black C, Peterson S, Kozyrskyi AL. The population's use of pharmaceuticals. *Med Care.* 1999;37(6 Suppl):JS42-JS59.

- 1  
2  
3 9. Bertakis K, Azari R, Helms L, Callahan E, Robbins J. Gender differences in the utilization of  
4 health care services. *J Fam Pract.* 2000;49(2):147-152.  
5  
6
- 7  
8 10. Arterburn DE, Maciejewski ML, Tsevat J. Impact of morbid obesity on medical expenditures  
9 in adults. *Int J Obes.* 2005;29(3):334-339.  
10  
11
- 12 11. Karmali KN, Lloyd-Jones DM, Berendsen M, et al. Drugs for primary prevention of  
13 atherosclerotic cardiovascular disease: an overview of systematic reviews. *JAMA Cardiol.*  
14 2016;1(3):341-349.  
15  
16
- 17 12. Fretheim A, Odgaard-Jensen, Brørs O, Madsen S, et al. Comparative effectiveness of  
18 antihypertensive medication for primary prevention of cardiovascular disease: systematic  
19 review and multiple treatments meta-analysis. *BMC Med.* 2012;10:33.  
20  
21
- 22 13. Taylor F, Huffman MD, Macedo A, et al. Statins for the primary prevention of  
23 cardiovascular disease. *Cochrane.* 2013. [http://www.cochrane.org/CD004816/VASC\\_statins-](http://www.cochrane.org/CD004816/VASC_statins-primary-prevention-cardiovascular-disease)  
24 primary-prevention-cardiovascular-disease. Accessed February 21, 2018.  
25  
26
- 27 14. Czeizel AE. Birth defects are preventable. *Int J Med Sci.* 2005;2(3):91-92.  
28  
29
- 30 15. Chan AT, Giovannucci EL. Primary prevention of colorectal cancer. *Gastroenterology.*  
31 2010;138(6):2029-2043.  
32  
33
- 34 16. Asthma. Mayo Clinic. [https://www.mayoclinic.org/diseases-conditions/asthma/diagnosis-](https://www.mayoclinic.org/diseases-conditions/asthma/diagnosis-treatment/drc-20369660)  
35 treatment/drc-20369660. Published March 9, 2018. Accessed February 24, 2018.  
36  
37
- 38 17. Arthritis. Mayo Clinic. [https://www.mayoclinic.org/diseases-conditions/arthritis/diagnosis-](https://www.mayoclinic.org/diseases-conditions/arthritis/diagnosis-treatment/drc-20350777)  
39 treatment/drc-20350777. Published March 7, 2018. Accessed February 24, 2018.  
40  
41
- 42 18. Preventive Medicine Reports Paper  
43  
44
- 45 19. Thompson D, Edelsberg J, Colditz GA, Bird AP, Oster G. Lifetime health and economic  
46 consequences of obesity. *Arch Intern Med.* 1999;119(18):2177-2183.  
47  
48  
49  
50  
51  
52  
53  
54  
55  
56  
57  
58  
59  
60

- 1
- 2
- 3 20. Pi-Sunyer X. The medical risks of obesity. *Postgrad Med.* 2009;121(6):21-33.
- 4
- 5 21. Kinge JM, Morris S. Association between obesity and prescribed medication use in England.
- 6
- 7 *Econ Hum Biol.* 2014;15:47-55.
- 8
- 9
- 10 22. Narbro K, Agren G, Jonsson E, et al. Pharmaceutical costs in obese individuals: comparison
- 11
- 12 with a randomly selected population sample and long-term changes after conventional and
- 13
- 14 surgical treatment: the SOS intervention study. *Arch Intern Med.* 2002;162(18):2061-2069.
- 15
- 16 23. Finkelstein EA, Trogdon JG, Cohen JW, Dietz W. Annual medical spending attributable to
- 17
- 18 obesity: payer-and service-specific estimates. *Health Aff.* 2009;28(5):w822-31.
- 19
- 20 24. Randhawa AK, Parikh JS, Kuk JL. Trends in medication use by body mass index and age
- 21
- 22 between 1988 and 2012 in the United States. *PLoS One.* 2017 Sep 20;12(9):e0184089.
- 23
- 24 25. Kit BK, Ogden CL, Flegal KM. Prescription medication use among normal weight,
- 25
- 26 overweight, and obese adults, United States, 2005-2008. *Ann Epidemiol.* 2012;22(2):112-
- 27
- 28 119.
- 29
- 30 26. Jarrett B, Bloch GJ, Bennett D, Bleazard B, Hedges D. The influence of body mass
- 31
- 32 index, age and gender on current illness: a cross-sectional study. *Int J Obes.* 2010;34(3):429-
- 33
- 34 436.
- 35
- 36 27. Raebel MA, Malone DC, Conner DA, Xu S, Porter JA, Lanty FA. Health services use
- 37
- 38 and health care costs of obese and nonobese individuals. *Arch Intern*
- 39
- 40 *Med.* 2004;164(19):2135-2140.
- 41
- 42 28. Fuentes AV, Pineda MD, Venkata KCN. Comprehension of top 200 prescribed drugs in
- 43
- 44 the US as a resource for pharmacy teaching, training and practice. *Pharmacy (Basel).*
- 45
- 46 2018;6(2):E43.
- 47
- 48 29. Alswat KA. Gender disparities in osteoporosis. *Clin Med Res.* 2017;9(5): 382–387.
- 49
- 50
- 51
- 52
- 53
- 54
- 55
- 56
- 57
- 58
- 59
- 60

- 1  
2  
3 30. Li H, Li J. Thyroid disorders in women. *Minerva Med.* 2015;106(2):109-114.  
4  
5 31. Kirkman MS, Briscoe VJ, Clark N, et al. Diabetes in older adults. *Diabetes Care.*  
6  
7 2012;35(12):2650-2664.  
8  
9 32. Traves KP, Studdiford JS, Pickle S, Tully AS. Edema: diagnosis and management. *Am Fam*  
10  
11 *Physician.* 2013;88(2):102-110.  
12  
13 33. Mc Donald Posso AJ, Motta Borrel JA, Fontes F, Cruz Gonzalez CE, Pachón Burgos  
14  
15 AA, Cumbreira Ortega A. High blood pressure in Panama: Prevalence, sociodemographic and  
16  
17 biologic profile, treatment, and control (STROBE). *Medicine (Baltimore).* 2014;93(22):  
18  
19 e101.  
20  
21 34. Ferrara A, Barrett-Connor E, Shan J. Total, LDL, and HDL cholesterol decrease with age in  
22  
23 older men and women. The Rancho Bernardo Study 1984-1994. *Circulation.* 1997;96(1):37-  
24  
25 43.  
26  
27 35. Gesing A. The thyroid gland and the process of aging. *Thyroid Res.* 2015;8(Suppl 1):A8.  
28  
29 36. A L D'Souza. Ageing and the gut. *Postgrad Med J.* 2007; 83(975):44–53.  
30  
31 37. Ma Y, Yang Y, Wang F, et al. Obesity and risk of colorectal cancer: a systematic review of  
32  
33 prospective studies. *PLoS One.* 2013;8(1):e53916.  
34  
35 38. Brown J, Wimpenny P, Maughan H. Skin problems in people with obesity. *Nurs Stand.*  
36  
37 2004;18(35):38-42.  
38  
39 39. Semins MJ, Shore AD, Makary MA, Weiner J, Matlaga BR. The impact  
40  
41 of obesity on urinary tract infection risk. *Urology.* 2012;79(2):266-269.  
42  
43 40. Ruhl CE, Everhart JE. Overweight, but not high dietary fat intake, increases risk of  
44  
45 gastroesophageal reflux disease hospitalization: the NHANES I Epidemiologic Followup  
46  
47  
48  
49  
50  
51  
52  
53  
54  
55  
56  
57  
58  
59  
60

- 1  
2  
3 Study. First National Health and Nutrition Examination Survey. *Ann Epidemiol.*  
4  
5 1999;9(7):424-435.  
6  
7  
8 41. Anggiansah R, Sweis R, Anggiansah A, Wong T, Cooper D, Fox M. The effects of obesity  
9  
10 on oesophageal function, acid exposure and the symptoms of gastro-oesophageal reflux  
11  
12 disease. *Alim Pharmacol Ther.* 2013;37(5):555-563.  
13  
14  
15 42. Jacobson BC, Somers SC, Fuchs CS, Kelly CP, Camargo CA Jr. Association between body  
16  
17 mass index and gastroesophageal reflux symptoms in both normal weight and overweight  
18  
19 women. *N Engl J Med.* 2006;354(22):2340-2348.  
20  
21  
22 43. Talley NJ, Howell S, Poulton R. Obesity and chronic gastrointestinal tract symptoms in  
23  
24 young adults: a birth cohort study. *Am J Gastroenterol* 2004;99(9):1807-1814.  
25  
26  
27 44. Boylan MR, Khalili H, Huang ES, Chan AT. Measures of adiposity are associated with  
28  
29 increased risk of peptic ulcer. *Clin Gastroenterol Hepatol.* 2014 Oct;12(10):1688-1694.  
30  
31  
32 45. Kim J, Kim KH, Lee BJ. Association of peptic ulcer disease with obesity, nutritional  
33  
34 components, and blood parameters in the Korean population. *PLoS One.* 2017;12(8):  
35  
36 e0183777.  
37  
38 46. Xu M, Liu L, Yuan B, Yin J, Lu Q. Association of obesity with *Helicobacter pylori* infection:  
39  
40 A retrospective study. *World J Gastroenterol* 2017;23(15):2750-2756.  
41  
42  
43 47. Falagas ME, Kompoti M. Obesity and infection. *Lancet Infect Dis* 2006;6(7)438-446.  
44  
45  
46 48. Huttunen R, Syrjanen J. Obesity and the risk and outcome of infection. *Int J Obes.*  
47  
48 2013;37:333-340.  
49  
50 49. Lübbecke A, Zingg M, Hoffmeyer P, et al. Body mass and weight thresholds for increased  
51  
52 prosthetic joint infection rates after primary total joint arthroplasty. *Acta Orthopaedica.*  
53  
54 2016;87(2):132-138  
55  
56  
57  
58  
59  
60

- 1  
2  
3 50. Yang JH, Bhargava P, McCloskey D, Mao N, Palsson BO, Collins JJ. Antibiotic-induced  
4 changes to the host metabolic environment inhibit drug efficacy and alter immune function.  
5  
6 Cell Host & Microbe. 2017;22(6):757-765.  
7  
8  
9
- 10 51. Early G. Current Evidence regarding antibiotic exposure and childhood obesity: an  
11 integrative review. *Ped Nurs*. 2017;43(4):169-174.  
12  
13
- 14 52. Bandaru P, Rajkumar H, Napanveettil G. The impact of obesity on immune response to  
15 infection and vaccine: an insight into plausible mechanisms. *Endocrinol Metab Syndr*  
16  
17 2013;2:2.  
18  
19
- 20 53. Kwong JC, Campitelli MA, Rosella LC. Obesity and respiratory hospitalizations during  
21 influenza seasons in Ontario, Canada: a cohort study. *Clin Infect Dis*. 2011;53(5):413-421.  
22  
23
- 24 54. Wang Z, Nakayama T. Inflammation, a link between obesity and cardiovascular disease.  
25  
26 *Mediators Inflamm*. 2010;2010:535918.  
27  
28
- 29 55. Bastard JP, Maachi M, Lagathu C, Kim MJ, Caron M, Vidal H, Capeau J, Feve B. Recent  
30 advances in the relationship between obesity, inflammation, and insulin resistance. *Eur*  
31  
32 *Cytokine Netw*. 2006;17(1):4-12.  
33  
34
- 35 56. Ciprandi G, Pistorio A, Tosca M, Ferraro MR, Cirillo I. Body mass index, respiratory  
36 function and bronchial hyperactivity in allergic rhinitis and asthma. *Respir Med*  
37  
38 2009;103(2):289-295.  
39  
40
- 41 57. Gorgievska-Sukarowska B, Lipozencić J, Susac A. Obesity and allergic diseases. *Acta*  
42  
43 *Dermatovenerol Croat*. 2008;16(4):231-235.  
44  
45
- 46 58. Shah R, Yang Y. Health and economic burden of obesity in elderly individuals with asthma  
47  
48 in the United States. *Popul Health Manag* 2015;18(3):186-191.  
49  
50  
51  
52  
53  
54  
55  
56  
57  
58  
59  
60



- 1  
2  
3 59. Guo Y, Moon JY, Laurie CC, et al. Genetic Predisposition to Obesity is associated  
4 with Asthma in US Hispanics/Latinos: Results from the Hispanic Community Health  
5 Study/Study of Latinos. *Allergy*. 2018;doi: 10.1111/all.13450. [Epub ahead of print]  
6  
7  
8  
9  
10 60. Rodriguez D. Obesity and Asthma – What’s the Connection.  
11  
12 <https://www.everydayhealth.com/asthma/obesity-connection.aspx>. Published August 28,  
13 2013. Accessed April 12, 2018.  
14  
15  
16  
17 61. Greene, A.K., et al. Lower-Extremity Lymphedema and Elevated Body-Mass Index. *N Engl*  
18 *J Med*. 2012;366:2136-2137.  
19  
20  
21 62. Helyer, L.K., et al. Obesity is a risk factor for developing postoperative lymphedema in  
22 breast cancer patients. *Breast J*. 2012;16(1):48-54.  
23  
24  
25  
26 63. Greene AK, Grant FD, Slavin SA, Maclellan RA. Obesity-induced lymphedema: clinical and  
27 lymphoscintigraphic features. *Plast Reconstr Surg*. 2015;135(6):1715-1719.  
28  
29  
30  
31 64. King LK, March L, Anandacoomarasamy A. Obesity & osteoarthritis. *Indian J Med Res*.  
32 2013;138(2):185-193.  
33  
34  
35 65. Baodong Qin, Min Yang, Haitao Fu, et al. Body mass index and the risk of rheumatoid  
36 arthritis: a systematic review and dose-response meta-analysis. *Arthritis Res Ther*.  
37 2015;17(1):86.  
38  
39  
40  
41  
42 66. Feng J, Chen Q, Yu F, et al. Body mass index and risk of rheumatoid arthritis: a meta-  
43 analysis of observational studies. *Medicine*. 2016;95(8):e2859.  
44  
45  
46  
47 67. Albrecht K, Richter A, Callhoff J, et al. Body mass index distribution in rheumatoid arthritis:  
48 a collaborative analysis from three large German rheumatoid arthritis databases. *Arthritis Res*  
49 *Ther*. 2016;18:149.  
50  
51  
52  
53  
54  
55  
56  
57  
58  
59  
60

- 1  
2  
3 68. Rodriguez D. How Your Immune System Worsens Arthritis. EverydayHealth.com.  
4  
5 <https://www.everydayhealth.com/arthritis/understanding/the-immune-system.aspx>. Published  
6  
7 August 1, 2012. Accessed April 11, 2018.  
8  
9
- 10 69. Sheridan PA, Paich HA, Handy J, et al. Obesity is associated with impaired immune response  
11  
12 to influenza vaccination in humans. *Int J Obes*. 2012;36(8):1072-1077.  
13
- 14 70. Painter SD, Ovsyannikova IG, Poland GA. The weight of obesity on the human immune  
15  
16 response to vaccination. *Vaccine*. 2015;33(36): 4422–4429.  
17  
18
- 19 71. Young KM, Gray CM, Bekker LG. Is Obesity a Risk Factor for Vaccine Non-  
20  
21 Responsiveness? *PLoS One*. 2013;8(12): e82779.  
22  
23
- 24 72. Okifuji A, Hare BD. The association between chronic pain and obesity. *J Pain Res*.  
25  
26 2015;8:399-408.  
27  
28
- 29 73. Erdmann J. Osteoarthritis and Obesity. [www.arthritis.org](http://www.arthritis.org). [https://www.arthritis.org/living-](https://www.arthritis.org/living-with-arthritis/comorbidities/obesity-arthritis/osteoarthritis-and-obesity.php)  
30  
31 [with-arthritis/comorbidities/obesity-arthritis/osteoarthritis-and-obesity.php](https://www.arthritis.org/living-with-arthritis/comorbidities/obesity-arthritis/osteoarthritis-and-obesity.php). Accessed April  
32  
33 11, 2018.  
34  
35
- 36 74. American Obesity Association. Health effects of obesity. AOA Fact Sheets. 2002.  
37  
38
- 39 75. Tashani OA, Asitita R, Sharp D, Johnson MI. Body mass index and distribution of body fat  
40  
41 can influence sensory detection and pain sensitivity. *Eur J Pain* 2017;21(7):1186-1196.  
42  
43
- 44 76. Rathee N. Obesity and depression: Are they related? *Indian J Health Well*. 2017;8(12):1472-  
45  
46 1475.  
47
- 48 77. Zhao G, Ford ES, Dhingra S, Li C, Strine TW, Mokdad AH. Depression and anxiety among  
49  
50 US adults: associations with body mass index. *Int J Obesity*. 2009;33(2):257-266.  
51  
52  
53  
54  
55  
56  
57  
58  
59  
60

- 1  
2  
3 78. Onyike CU, Crum RM, Lee HB, Lyketsos DG, Eaton WW. Is obesity associated with major  
4 depression? Results from the Third National Health and Nutrition Examination Survey. *Am J*  
5  
6 *Epidemiol.* 2003;158(12):1139-1147.  
7  
8  
9  
10 79. Petry NM, Barry D, Pietrzak RH, Wagner JA. Overweight and obesity are associated with  
11  
12 psychiatric disorders: results from the National Epidemiologic Survey on Alcohol and  
13  
14 Related Conditions. *Psychosom Med.* 2008;70(3):288-297.  
15  
16  
17 80. Pratt LA, Brody DJ. Depression and obesity in the U.S. adult household population, 2005-  
18  
19 2010. NCHS Data Brief, No. 167, October 2014.  
20  
21  
22 81. McElroy SL, Kotwal R, Malhotra S, Nelson EB, Keck PE, Nemeroff CB. Are mood  
23  
24 disorders and obesity related? A review for the mental health professional. *J Clin Psychiatry*  
25  
26 2004;65(5):634-651.  
27  
28  
29 82. Ferraro KF, Su Y, Gretebeck RJ, Black DR, Badylak SF. Body mass index and disability in  
30  
31 adulthood: A 20-year panel study. *Am J Public Health.* 2002;92(5):834-840.  
32  
33  
34 83. Katon W, Ciechanowski P. Impact of major depression on chronic medical illness. *J*  
35  
36 *Psychosom Res.* 2002;53(4):859-863.  
37  
38  
39 84. Baltaci D, Kutlucan A, Turker Y, et al. Association of vitamin B12 with obesity, overweight,  
40  
41 insulin resistance and metabolic syndrome, and body fat composition; primary care-based  
42  
43 study. *Med Glas.* 2013;10(2):203-210.  
44  
45  
46 85. Pereira-Santos M, Costa PR, Assis AM, Santos CA, Santos DB. Obesity and vitamin D  
47  
48 deficiency: a systematic review and meta-analysis. *Obes Rev.* 2015;16(4):341-349.  
49  
50  
51 86. Black RE, Morris SS, Bryce J. Where and why are 10 million children dying every year? *The*  
52  
53 *Lancet* 2003;361:2226-2234.  
54  
55  
56  
57  
58  
59  
60

1  
2  
3 87. Merrill RM, Telford CT. Pharmaceutical use according to participation in worksite wellness  
4 screening and health campaigns. *Prev Med Rep* 2018;12:158-163.  
5  
6  
7

## 8 **Footnotes**

9

10  
11 Contributors: RMM conceived and designed the epidemiological study, contributed to  
12 acquisition of data, analyzed and interpreted the data, and drafted the manuscript. RPF  
13 interpreted the data, provided a literature review, and revised the manuscript. Both authors  
14 critically revised the manuscript for important intellectual content. The manuscript has been read  
15 and approved by both authors.  
16  
17  
18  
19  
20  
21  
22

23 Funding: The authors have not declared a specific grant for this research from any funding  
24 agency in the public, commercial or not-for-profit sectors.  
25  
26  
27

28 Competing interests: None declared.  
29  
30

31 Patient consent: Not required.  
32  
33

34 Ethics approval: Study approval was obtained from the institutional review board at Brigham  
35 Young University (IRB E1 5259).  
36  
37  
38

39 Provenance and peer review: Not commissioned; externally peer reviewed.  
40  
41

42 Data sharing statement: The data sets used and analyzed in the current study are available from  
43 the corresponding author on reasonable request.  
44  
45  
46

47 Patient and Public Involvement statement: Employee data consisted of sex, age, and BMI, which  
48 was linked to medical and pharmacy claims data. No personal identifying information was  
49 retained in the linked data set.  
50  
51  
52  
53  
54  
55  
56  
57  
58  
59  
60

Table 1 Characterization of the study group according to sex, age, medical and pharmacy costs

|                            | No.  | %     | Continuously Employed % | Chi-square p value | Risk Ratio | 95% CI    |
|----------------------------|------|-------|-------------------------|--------------------|------------|-----------|
| <b>Sex</b>                 |      |       |                         |                    |            |           |
| Men                        | 797  | 26.36 | 84.69                   | 0.3884             | 1.00       |           |
| Women                      | 2226 | 73.64 | 83.38                   |                    | 0.98       | 0.95-1.02 |
| <b>Age Group</b>           |      |       |                         |                    |            |           |
| 18-39                      | 770  | 25.47 | 82.21                   | < 0.0001           | 1.00       |           |
| 40-49                      | 806  | 26.66 | 89.45                   |                    | 1.09       | 1.05-1.13 |
| 50-59                      | 1088 | 35.99 | 88.24                   |                    | 1.07       | 1.03-1.12 |
| 60-76                      | 359  | 11.88 | 60.45                   |                    | 0.74       | 0.67-0.80 |
| <b>Medical Cost (USD)</b>  |      |       |                         |                    |            |           |
| 0-184                      | 755  | 25.0  | 87.55                   | < 0.0001           | 1.00       |           |
| 185-604                    | 757  | 25.0  | 85.07                   |                    | 0.97       | 0.93-1.01 |
| 605-2049                   | 755  | 25.0  | 84.64                   |                    | 0.97       | 0.93-1.01 |
| 2050-7191                  | 454  | 15.0  | 79.30                   |                    | 0.91       | 0.86-0.96 |
| 7192+                      | 302  | 10.0  | 75.17                   |                    | 0.86       | 0.80-0.92 |
| <b>Pharmacy Cost (USD)</b> |      |       |                         |                    |            |           |
| 0-6                        | 759  | 25.0  | 86.92                   | < 0.0001           | 1.00       |           |
| 7-194                      | 755  | 25.0  | 85.21                   |                    | 0.99       | 0.69-1.03 |
| 195-903                    | 755  | 25.0  | 82.59                   |                    | 0.96       | 0.92-1.00 |
| 904-2303                   | 452  | 15.0  | 84.14                   |                    | 0.99       | 0.94-1.04 |
| 2304+                      | 302  | 10.0  | 74.92                   |                    | 0.86       | 0.80-0.93 |

Sex, age, medical and pharmacy costs apply to the 2010-11 academic year.

Table 2 Medical and pharmacy costs according to sex, age, year, and body mass index

|                          | BMI (kg/m <sup>2</sup> ) |      |     | Medical Cost (USD) |       |     | Median | Median one-way analysis | Pharmacy Cost (USD) |      |      | Median | Median one-way analysis |
|--------------------------|--------------------------|------|-----|--------------------|-------|-----|--------|-------------------------|---------------------|------|------|--------|-------------------------|
|                          | Mean                     | SD   | SNK | Mean               | SD    | SNK |        | p value                 | Mean                | SD   | SNK  |        | p value                 |
| Sex                      |                          |      |     |                    |       |     |        |                         |                     |      |      |        |                         |
| Men                      | 29.35                    | 5.80 | A   | 2869               | 10581 | A   | 373    | < 0.0001                | 725                 | 2324 | A    | 53     | < 0.0001                |
| Women                    | 27.26                    | 6.47 | B   | 3447               | 12049 | A   | 741    |                         | 963                 | 3550 | B    | 238    |                         |
| Age Group                |                          |      |     |                    |       |     |        |                         |                     |      |      |        |                         |
| 18-39                    | 27.17                    | 6.06 | A   | 2236               | 9344  | A   | 389    | < 0.0001                | 660                 | 3342 | A    | 70     | < 0.0001                |
| 40-49                    | 27.76                    | 6.42 | B   | 3052               | 12366 | B   | 503    |                         | 750                 | 2806 | A    | 106    |                         |
| 50-59                    | 28.05                    | 6.55 | B   | 3935               | 12579 | B   | 845    |                         | 1021                | 3288 | B    | 261    |                         |
| 60-76                    | 28.17                    | 6.13 | B   | 3749               | 10831 | B   | 989    |                         | 1288                | 3990 | C    | 344    |                         |
| Year                     |                          |      |     |                    |       |     |        |                         |                     |      |      |        |                         |
| 2010-11                  | 27.89                    | 6.40 | A   | 3188               | 10524 | A   | 605    | 0.2313                  | 830                 | 2247 | A    | 195    | 0.0016                  |
| 2011-12                  | 27.79                    | 6.31 | A   | 3621               | 12816 | A   | 610    |                         | 953                 | 3180 | A    | 189    |                         |
| 2012-13                  | 27.87                    | 6.59 | A   | 3208               | 11836 | A   | 670    |                         | 934                 | 3571 | A    | 173    |                         |
| 2013-14                  | 27.63                    | 6.16 | A   | 3191               | 11557 | A   | 651    |                         | 894                 | 3913 | A    | 141    |                         |
| BMI (kg/m <sup>2</sup> ) |                          |      |     |                    |       |     |        |                         |                     |      |      |        |                         |
| Underweight              |                          |      |     | 2191               | 1190  | A   | 647    | 0.0003                  | 1454                | 6706 | A    | 224    | 0.0004                  |
| Normal weight            |                          |      |     | 2826               | 333   | A   | 650    |                         | 779                 | 3285 | B    | 167    |                         |
| Overweight               |                          |      |     | 3174               | 514   | A   | 603    |                         | 926                 | 3085 | A, B | 169    |                         |
| Obese                    |                          |      |     | 3544               | 459   | A   | 665    |                         | 1031                | 3458 | A, B | 228    |                         |
| Morbidly obese           |                          |      |     | 6911               | 2092  | B   | 1033   |                         | 853                 | 1493 | A, B | 242    |                         |

SNK: Student-Newman-Keuls Test. Different letters in the SNK columns indicate significant difference among the levels of the variables at the 0.05 level.

Table 3 Risk of medical and pharmacy costs (USD) above the 50<sup>th</sup>, 75<sup>th</sup>, and 90<sup>th</sup> percentiles according to BMI weight classification, sex, and age

|                          | Medical                                        |           |                                                |           |                                                |           | Pharmacy                                       |           |                                                |           |                                                |           |
|--------------------------|------------------------------------------------|-----------|------------------------------------------------|-----------|------------------------------------------------|-----------|------------------------------------------------|-----------|------------------------------------------------|-----------|------------------------------------------------|-----------|
|                          | 50 <sup>th</sup> percentile<br>Above vs. below |           | 75 <sup>th</sup> percentile<br>Above vs. below |           | 90 <sup>th</sup> percentile<br>Above vs. below |           | 50 <sup>th</sup> percentile<br>Above vs. below |           | 75 <sup>th</sup> percentile<br>Above vs. below |           | 90 <sup>th</sup> percentile<br>Above vs. below |           |
|                          | Risk Ratio                                     | 95% CI    |
| Sex                      |                                                |           |                                                |           |                                                |           |                                                |           |                                                |           |                                                |           |
| Men                      | 1.00                                           |           | 1.00                                           |           | 1.00                                           |           | 1.00                                           |           | 1.00                                           |           | 1.00                                           |           |
| Women                    | 1.43                                           | 1.36-1.51 | 1.47                                           | 1.35-1.60 | 1.42                                           | 1.24-1.64 | 1.58                                           | 1.50-1.66 | 1.59                                           | 1.46-1.74 | 1.14                                           | 1.00-1.29 |
| Age Groups               |                                                |           |                                                |           |                                                |           |                                                |           |                                                |           |                                                |           |
| 18-39                    | 1.00                                           |           | 1.00                                           |           | 1.00                                           |           | 1.00                                           |           | 1.00                                           |           | 1.00                                           |           |
| 40-49                    | 1.16                                           | 1.08-1.23 | 1.15                                           | 1.03-1.29 | 1.08                                           | 0.90-1.28 | 1.14                                           | 1.07-1.22 | 1.45                                           | 1.29-1.64 | 1.72                                           | 1.37-2.15 |
| 50-59                    | 1.50                                           | 1.42-1.59 | 1.65                                           | 1.50-1.82 | 1.36                                           | 1.16-1.58 | 1.48                                           | 1.39-1.56 | 2.28                                           | 2.05-2.55 | 2.82                                           | 2.30-3.46 |
| 60+                      | 1.61                                           | 1.52-1.72 | 1.83                                           | 1.64-2.04 | 1.33                                           | 1.11-1.60 | 1.57                                           | 1.48-1.68 | 2.57                                           | 2.29-2.89 | 3.78                                           | 3.06-4.68 |
| BMI (kg/m <sup>2</sup> ) |                                                |           |                                                |           |                                                |           |                                                |           |                                                |           |                                                |           |
| Underweight              | 1.05                                           | 0.88-1.26 | 0.91                                           | 0.64-1.31 | 0.61                                           | 0.28-1.35 | 2.05                                           | 1.25-3.34 | 1.05                                           | 0.74-1.48 | 2.05                                           | 1.25-3.34 |
| Normal weight            | 1.00                                           |           | 1.00                                           |           | 1.00                                           |           | 1.00                                           |           | 1.00                                           |           | 1.00                                           |           |
| Overweight               | 0.95                                           | 0.90-1.00 | 0.95                                           | 0.86-1.05 | 1.01                                           | 0.85-1.20 | 1.01                                           | 0.95-1.06 | 1.18                                           | 1.07-1.30 | 1.68                                           | 1.41-2.00 |
| Obese                    | 1.00                                           | 0.95-1.06 | 1.14                                           | 1.03-1.25 | 1.21                                           | 1.01-1.43 | 1.11                                           | 1.05-1.17 | 1.19                                           | 1.08-1.31 | 1.76                                           | 1.47-2.12 |
| Morbidly obese           | 1.18                                           | 1.08-1.29 | 1.62                                           | 1.40-1.87 | 2.18                                           | 1.72-2.77 | 1.13                                           | 1.03-1.25 | 1.30                                           | 1.09-1.55 | 1.93                                           | 1.43-2.61 |

Shaded cells represent statistical significance at the 0.05 level.

Table 4 Medication use according to sex, age, and BMI weight classification

|                     |       | Sex   |       | Age Group |       |       |       | Body Mass Index (kg/m <sup>2</sup> ) |               |             |       |                |
|---------------------|-------|-------|-------|-----------|-------|-------|-------|--------------------------------------|---------------|-------------|-------|----------------|
|                     |       | Men   | Women | 18-39     | 40-49 | 50-59 | 60+   | Underweight                          | Normal weight | Over weight | Obese | Morbidly obese |
| Medication          | %     |       |       |           |       |       |       |                                      |               |             |       |                |
| Acid Reflux         | 5.75  | 5.56  | 5.81  | 3.02      | 4.54  | 7.14  | 8.36  | 3.57                                 | 4.34          | 5.36        | 7.19  | 9.14           |
| Risk ratio          |       | 1.00  | 1.04  | 1.00      | 1.50  | 2.36  | 2.77  | 0.82                                 | 1.00          | 1.24        | 1.66  | 2.11           |
| AF <sub>p</sub> (%) |       | 0.00  | 0.26  | 0.00      | 2.81  | 7.27  | 9.23  |                                      | 0.00          | 1.33        | 3.64  | 5.98           |
| Acne                | 7.17  | 3.15  | 8.62  | 7.15      | 7.03  | 7.16  | 7.40  | 9.82                                 | 8.81          | 6.64        | 6.34  | 6.18           |
| Risk ratio          |       | 1.00  | 2.74  | 1.00      | 0.98  | 1.00  | 1.03  | 1.11                                 | 1.00          | 0.75        | 0.72  | 0.70           |
| AF <sub>p</sub> (%) |       | 0.00  | 11.07 | 0.00      | 0.01  | 0.25  | 0.25  | 0.82                                 | 0.00          |             |       |                |
| Antibiotic          | 21.21 | 17.81 | 22.44 | 18.72     | 20.76 | 22.76 | 21.93 | 25.89                                | 20.54         | 20.74       | 23.73 | 21.24          |
| Risk ratio          |       | 1.00  | 1.26  | 1.00      | 1.11  | 1.22  | 1.17  | 1.26                                 | 1.00          | 1.01        | 1.16  | 1.03           |
| AF <sub>p</sub> (%) |       | 0.00  | 5.23  | 0.00      | 2.26  | 4.38  | 3.51  | 5.24                                 | 0.00          | 0.21        | 3.19  | 0.72           |
| Anticonvulsants     | 1.49  | 1.39  | 1.53  | 1.84      | 1.32  | 1.45  | 1.40  | 2.68                                 | 1.25          | 1.13        | 1.65  | 1.61           |
| Risk ratio          |       | 1.00  | 1.10  | 1.00      | 0.72  | 0.79  | 0.76  | 2.14                                 | 1.00          | 0.90        | 1.32  | 1.29           |
| AF <sub>p</sub> (%) |       | 0.00  | 0.15  | 0.00      |       |       |       | 1.68                                 | 0.00          |             | 0.47  | 0.43           |
| Antifungal          | 5.29  | 2.61  | 5.81  | 5.64      | 6.03  | 4.24  | 3.87  | 5.36                                 | 5.83          | 3.81        | 6.24  | 6.18           |
| Risk ratio          |       | 1.00  | 2.23  | 1.00      | 1.07  | 0.75  | 0.69  | 0.92                                 | 1.00          | 0.65        | 1.07  | 1.06           |
| AF <sub>p</sub> (%) |       | 0.00  | 6.09  | 0.00      | 0.36  |       |       |                                      | 0.00          |             | 0.37  | 0.32           |
| Anxiety             | 7.88  | 6.31  | 8.45  | 6.42      | 7.80  | 8.36  | 8.97  | 8.93                                 | 7.22          | 7.11        | 7.29  | 6.45           |
| Risk ratio          |       | 1.00  | 1.34  | 1.00      | 1.21  | 1.30  | 1.40  | 1.24                                 | 1.00          | 0.98        | 1.01  | 0.89           |
| AF <sub>p</sub> (%) |       | 0.00  | 2.60  | 0.00      | 1.67  | 2.33  | 3.03  | 1.83                                 | 0.00          |             | 0.08  |                |
| Arthritis           | 11.06 | 11.13 | 11.03 | 7.72      | 10.53 | 12.83 | 12.56 | 7.14                                 | 9.36          | 10.72       | 13.84 | 14.78          |
| Risk ratio          |       | 1.00  | 0.99  | 1.00      | 1.36  | 1.66  | 1.63  | 0.76                                 | 1.00          | 1.15        | 1.48  | 1.58           |
| AF <sub>p</sub> (%) |       | 0.00  |       | 0.00      | 3.87  | 6.82  | 6.48  |                                      | 0.00          | 1.58        | 5.03  | 6.02           |
| Asthma              | 8.61  | 7.19  | 9.13  | 7.48      | 8.80  | 8.00  | 11.22 | 6.25                                 | 6.24          | 8.74        | 10.39 | 10.75          |



1  
2  
3  
4  
5  
6  
7  
8  
9  
10  
11  
12  
13  
14  
15  
16  
17  
18  
19  
20  
21  
22  
23  
24  
25  
26  
27  
28  
29  
30  
31  
32  
33  
34  
35  
36  
37  
38  
39  
40  
41  
42  
43  
44  
45  
46  
47

|                        |       |       |       |       |       |       |       |       |       |       |       |       |
|------------------------|-------|-------|-------|-------|-------|-------|-------|-------|-------|-------|-------|-------|
| Risk ratio             |       | 1.00  | 1.27  | 1.00  | 1.18  | 1.07  | 1.50  | 1.00  | 1.00  | 1.40  | 1.67  | 1.72  |
| AF <sub>p</sub> (%)    |       | 0.00  | 2.27  | 0.00  | 1.50  | 0.59  | 4.13  | 0.01  | 0.00  | 3.33  | 5.42  | 5.86  |
| Birth Control          | 8.71  | 0.24  | 10.88 | 21.13 | 8.77  | 2.59  | 0.95  | 10.71 | 11.69 | 7.30  | 6.34  | 6.99  |
| Risk ratio             |       | 1.00  | 45.33 | 1.00  | 0.42  | 0.12  | 0.04  | 0.92  | 1.00  | 0.62  | 0.54  | 0.60  |
| AF <sub>p</sub> (%)    |       | 0.00  | 79.43 | 0.00  |       |       |       |       | 0.00  |       |       |       |
| Blood Thinner          | 1.26  | 1.85  | 1.05  | 3.91  | 18.75 | 45.31 | 32.03 | 0.95  | 0.52  | 1.15  | 2.08  | 5.22  |
| Risk ratio             |       | 1.00  | 0.57  | 1.00  | 4.80  | 11.59 | 8.19  | 1.83  | 1.00  | 2.21  | 4.00  | 10.04 |
| AF <sub>p</sub> (%)    |       | 0.00  |       | 0     | 4.56  | 11.77 | 8.31  | 1.03  | 0     | 1.50  | 3.64  | 10.22 |
| Bowel/Rectum           | 3.06  | 2.75  | 3.17  | 1.76  | 2.84  | 3.53  | 4.15  | 1.79  | 3.15  | 2.87  | 2.85  | 2.96  |
| Risk ratio             |       | 1.00  | 1.15  | 1.00  | 1.61  | 2.01  | 2.36  | 0.57  | 1.00  | 0.91  | 0.90  | 0.94  |
| AF <sub>p</sub> (%)    |       | 0.00  | 0.47  | 0.00  | 1.84  | 2.99  | 3.99  |       | 0.00  |       |       |       |
| Cold/Influenza/Allergy | 17.80 | 14.52 | 18.99 | 15.73 | 18.30 | 18.14 | 19.07 | 22.32 | 15.53 | 18.56 | 20.38 | 22.04 |
| Risk ratio             |       | 1.00  | 1.31  | 1.00  | 1.16  | 1.15  | 1.21  | 1.44  | 1.00  | 1.20  | 1.31  | 1.42  |
| AF <sub>p</sub> (%)    |       | 0.00  | 5.20  | 0.00  | 2.83  | 2.65  | 3.64  | 7.22  | 0.00  | 3.36  | 5.27  | 6.94  |
| Depression             | 18.24 | 10.28 | 21.14 | 12.51 | 19.30 | 20.75 | 18.84 | 15.18 | 16.20 | 17.59 | 20.83 | 18.55 |
| Risk ratio             |       | 1.00  | 2.06  | 1.00  | 1.54  | 1.66  | 1.51  | 0.94  | 1.00  | 1.09  | 1.29  | 1.15  |
| AF <sub>p</sub> (%)    |       | 0.00  | 16.16 | 0.00  | 9.01  | 10.73 | 8.45  |       | 0.00  | 1.54  | 4.95  | 2.58  |
| Diabetes               | 6.32  | 6.48  | 6.22  | 2.53  | 4.50  | 7.82  | 10.94 | 1.79  | 2.24  | 5.67  | 11.29 | 17.74 |
| Risk ratio             |       | 1.00  | 0.96  | 1.00  | 1.78  | 3.09  | 4.32  | 0.80  | 1.00  | 2.53  | 5.04  | 7.92  |
| AF <sub>p</sub> (%)    |       | 0.00  |       | 0.00  | 4.69  | 11.67 | 17.36 |       | 0.00  | 8.82  | 20.34 | 30.43 |
| Edema                  | 5.14  | 3.12  | 5.87  | 2.04  | 3.64  | 6.48  | 8.86  | 6.25  | 3.08  | 4.66  | 7.29  | 12.90 |
| Risk ratio             |       | 1.00  | 1.88  | 1.00  | 1.78  | 3.18  | 4.34  | 2.03  | 1.00  | 1.51  | 2.37  | 4.19  |
| AF <sub>p</sub> (%)    |       | 0.00  | 4.33  | 0.00  | 3.88  | 10.06 | 14.66 | 5.02  | 0.00  | 2.57  | 6.56  | 14.08 |
| Eye Infection          | 12.01 | 9.23  | 12.87 | 11.44 | 13.06 | 11.13 | 12.34 | 14.29 | 11.02 | 12.12 | 13.64 | 9.68  |
| Risk ratio             |       | 1.00  | 1.39  | 1.00  | 1.14  | 0.97  | 1.08  | 1.30  | 1.00  | 1.10  | 1.24  | 0.88  |
| AF <sub>p</sub> (%)    |       | 0.00  | 4.52  | 0.00  | 1.67  |       | 0.94  | 3.44  | 0.00  | 1.18  | 2.78  |       |
| Herpes                 | 6.30  | 3.26  | 6.86  | 4.82  | 7.24  | 6.12  | 4.71  | 1.79  | 7.66  | 7.22  | 4.20  | 1.88  |
| Risk ratio             |       | 1.00  | 2.10  | 1.00  | 1.50  | 1.27  | 0.98  | 0.23  | 1.00  | 0.94  | 0.55  | 0.25  |
| AF <sub>p</sub> (%)    |       | 0.00  | 6.50  | 0.00  | 3.07  | 1.67  |       |       | 0.00  |       |       |       |
| High Blood Pressure    | 16.49 | 19.95 | 15.60 | 4.58  | 11.05 | 22.78 | 29.39 | 6.25  | 8.54  | 17.44 | 24.68 | 31.99 |
| Risk ratio             |       | 1.00  | 0.78  | 1.00  | 2.41  | 4.97  | 6.42  | 0.73  | 1.00  | 2.04  | 2.89  | 3.75  |
| AF <sub>p</sub> (%)    |       | 0.00  |       | 0.00  | 18.89 | 39.59 | 47.18 |       | 0.00  | 14.66 | 23.76 | 31.17 |

|                     |       |       |       |       |       |       |       |       |       |       |       |       |
|---------------------|-------|-------|-------|-------|-------|-------|-------|-------|-------|-------|-------|-------|
| Inflammation        | 1.19  | 0.68  | 1.37  | 0.69  | 0.87  | 1.50  | 1.68  | 1.79  | 0.98  | 1.40  | 0.80  | 1.61  |
| Risk ratio          |       | 1.00  | 2.01  | 1.00  | 1.26  | 2.17  | 2.43  | 1.83  | 1.00  | 1.43  | 0.82  | 1.64  |
| AF <sub>p</sub> (%) |       | 0.00  | 1.19  | 0.00  | 0.31  | 1.38  | 1.68  | 0.97  | 0.00  | 0.51  |       | 0.76  |
| Insomnia            | 4.23  | 2.24  | 4.95  | 2.70  | 3.60  | 5.72  | 4.04  | 8.93  | 4.07  | 3.92  | 3.85  | 4.84  |
| Risk ratio          |       | 1.00  | 2.21  | 1.00  | 1.33  | 2.12  | 1.50  | 2.19  | 1.00  | 0.96  | 0.95  | 1.19  |
| AF <sub>p</sub> (%) |       | 0.00  | 4.87  | 0.00  | 1.39  | 4.52  | 2.06  | 4.81  | 0.00  |       |       | 0.79  |
| Muscle Spasms       | 4.34  | 3.53  | 4.64  | 3.11  | 4.57  | 4.93  | 4.37  | 5.36  | 3.29  | 4.27  | 5.44  | 6.99  |
| Risk ratio          |       | 1.00  | 1.31  | 1.00  | 1.47  | 1.59  | 1.41  | 1.63  | 1.00  | 1.30  | 1.65  | 2.12  |
| AF <sub>p</sub> (%) |       | 0.00  | 1.35  | 0.00  | 2.00  | 2.48  | 1.73  | 2.66  | 0.00  | 1.28  | 2.76  | 4.65  |
| Nausea/Vomiting     | 5.01  | 3.77  | 5.47  | 5.44  | 4.85  | 4.83  | 5.10  | 4.46  | 4.14  | 4.50  | 6.19  | 5.65  |
| Risk ratio          |       | 1.00  | 1.45  | 1.00  | 0.89  | 0.89  | 0.94  | 1.08  | 1.00  | 1.09  | 1.50  | 1.36  |
| AF <sub>p</sub> (%) |       | 0.00  | 2.21  | 0.00  |       |       |       | 0.39  | 0.00  | 0.43  | 2.42  | 1.79  |
| Opioids             | 17.04 | 15.98 | 17.42 | 14.14 | 16.29 | 18.62 | 18.73 | 17.86 | 13.39 | 15.77 | 20.28 | 27.69 |
| Risk ratio          |       | 1.00  | 1.09  | 1.00  | 1.15  | 1.32  | 1.32  | 1.33  | 1.00  | 1.18  | 1.51  | 2.07  |
| AF <sub>p</sub> (%) |       | 0.00  | 1.51  | 0.00  | 2.53  | 5.12  | 5.24  | 5.38  | 0.00  | 2.94  | 8.06  | 15.40 |
| Osteoporosis        | 1.21  | 0.07  | 1.63  | 0.00  | 0.17  | 1.30  | 4.37  | 0.89  | 1.56  | 1.20  | 0.85  | 0.00  |
| Risk ratio          |       | 1.00  | 23.29 | 1.00  |       |       |       | 0.57  | 1.00  | 0.77  | 0.54  | 0.00  |
| AF <sub>p</sub> (%) |       | 0.00  | 21.24 | 0.00  |       |       |       |       | 0.00  |       |       |       |
| Pain – non opioid   | 2.19  | 1.63  | 2.39  | 2.78  | 2.15  | 1.98  | 1.91  | 3.57  | 1.73  | 1.67  | 2.55  | 2.96  |
| Risk ratio          |       | 1.00  | 1.47  | 1.00  | 0.77  | 0.71  | 0.69  | 2.06  | 1.00  | 0.97  | 1.47  | 1.71  |
| AF <sub>p</sub> (%) |       | 0.00  | 1.01  | 0.00  |       |       |       | 2.28  | 0.00  |       | 1.03  | 1.53  |
| Skin                | 6.84  | 4.88  | 7.55  | 5.44  | 6.44  | 7.37  | 8.24  | 6.25  | 7.25  | 6.41  | 7.19  | 5.38  |
| Risk ratio          |       | 1.00  | 1.55  | 1.00  | 1.18  | 1.35  | 1.51  | 0.86  | 1.00  | 0.88  | 0.99  | 0.74  |
| AF <sub>p</sub> (%) |       | 0.00  | 3.61  | 0.00  | 1.24  | 2.37  | 3.40  |       | 0.00  |       |       |       |
| Statins             | 14.49 | 17.93 | 13.24 | 2.31  | 8.53  | 20.58 | 28.4  | 3.81  | 7.02  | 17.95 | 19.89 | 27.47 |
| Risk ratio          |       | 1.00  | 0.74  | 1.00  | 3.69  | 8.91  | 12.29 | 0.54  | 1.00  | 2.56  | 2.83  | 3.91  |
| AF <sub>p</sub> (%) |       | 0.00  |       | 0.00  | 28.07 | 53.40 | 62.07 |       | 0.00  | 18.41 | 20.99 | 29.68 |
| Stomach Acid        | 1.19  | 1.49  | 1.07  | 0.86  | 1.25  | 0.99  | 1.96  | 0.89  | 0.81  | 1.01  | 1.90  | 1.08  |
| Risk ratio          |       | 1.00  | 0.72  | 1.00  | 1.45  | 1.15  | 2.28  | 1.10  | 1.00  | 1.25  | 2.35  | 1.33  |
| AF <sub>p</sub> (%) |       | 0.00  |       | 0.00  | 0.54  | 0.18  | 1.50  | 0.12  | 0.00  | 0.29  | 1.58  | 0.40  |
| Teeth/Gums          | 0.43  | 0.37  | 0.46  | 0.37  | 0.35  | 0.43  | 0.67  | 0.00  | 0.27  | 0.43  | 0.35  | 0.27  |
| Risk ratio          |       | 1.00  | 1.24  | 1.00  | 0.95  | 1.16  | 1.81  | 0.00  | 1.00  | 1.59  | 1.30  | 1.00  |

|                         |       |       |       |       |       |       |       |       |       |       |       |       |
|-------------------------|-------|-------|-------|-------|-------|-------|-------|-------|-------|-------|-------|-------|
| AF <sub>p</sub> (%)     |       | 0.00  | 0.10  | 0.00  |       | 0.07  | 0.35  |       | 0.00  | 0.25  | 0.13  | 0.00  |
| Thyroid                 | 12.76 | 2.99  | 16.31 | 4.37  | 11.19 | 16.92 | 17.61 | 6.25  | 13.97 | 12.74 | 13.94 | 19.09 |
| Risk ratio              |       | 1.00  | 5.45  | 1.00  | 2.56  | 3.87  | 4.03  | 0.45  | 1.00  | 0.91  | 1.00  | 1.37  |
| AF <sub>p</sub> (%)     |       | 0.00  | 36.24 | 0.00  | 16.61 | 26.82 | 27.88 |       | 0.00  |       |       | 4.47  |
| Ulcers                  | 9.38  | 8.55  | 9.69  | 8.30  | 8.28  | 10.19 | 10.88 | 10.71 | 7.59  | 9.90  | 10.99 | 15.32 |
| Risk ratio              |       | 1.00  | 1.13  | 1.00  | 1.00  | 1.23  | 1.31  | 1.41  | 1.00  | 1.30  | 1.45  | 2.02  |
| AF <sub>p</sub> (%)     |       | 0.00  | 1.24  | 0.00  |       | 2.09  | 2.83  | 3.71  | 0.00  | 2.78  | 4.03  | 8.72  |
| Urinary Tract Infection | 3.01  | 0.20  | 4.44  | 3.39  | 3.08  | 3.45  | 3.25  | 6.25  | 3.83  | 2.83  | 3.50  | 3.76  |
| Risk ratio              |       | 1.00  | 22.20 | 1.00  | 0.91  | 1.02  | 0.96  | 1.63  | 1.00  | 0.74  | 0.91  | 0.98  |
| AF <sub>p</sub> (%)     |       | 0.00  | 38.95 | 0.00  |       | 0.05  |       | 1.87  | 0.00  |       |       |       |
| Vitamins/Minerals       | 2.07  | 0.71  | 2.57  | 2.49  | 1.73  | 1.88  | 2.47  | 0.00  | 2.07  | 1.28  | 1.75  | 5.38  |
| Risk ratio              |       | 1.00  | 3.62  | 1.00  | 0.69  | 0.76  | 0.99  | 0.00  | 1.00  | 0.62  | 0.85  | 2.60  |
| AF <sub>p</sub> (%)     |       | 0.00  | 5.14  | 0.00  |       |       |       |       | 0.00  |       |       | 3.20  |
| All prescriptions       | 80.87 | 71.40 | 84.32 | 71.52 | 78.45 | 85.24 | 88.00 | 83.93 | 81.46 | 81.28 | 83.47 | 86.29 |
| Risk ratio              |       | 1.00  | 1.18  | 1.00  | 1.10  | 1.19  | 1.23  | 1.03  | 1.00  | 1.00  | 1.02  | 1.06  |
| AF <sub>p</sub> (%)     |       | 0.00  | 12.77 | 0.00  | 7.27  | 13.43 | 15.71 | 2.39  | 0.00  |       | 1.96  | 4.58  |

AF<sub>p</sub>: Attributable fraction in the population. Shaded cells represent statistical significance at the 0.05 level. Cells that are left blank had a negative AF<sub>p</sub>. In these cases the preventive fraction ( $[\text{Risk Ratio} - 1] \times 100$ ) is more appropriate.

For peer review only

1  
2  
3  
4  
5  
6  
7  
8  
9  
10  
11  
12  
13  
14  
15  
16  
17  
18  
19  
20  
21  
22  
23  
24  
25  
26  
27  
28  
29  
30  
31  
32  
33  
34  
35  
36  
37  
38  
39  
40  
41  
42  
43  
44  
45  
46  
47

Figure 1. Median medical and pharmacy cost (USD) according to Body Mass Index weight classifications and age

For peer review only

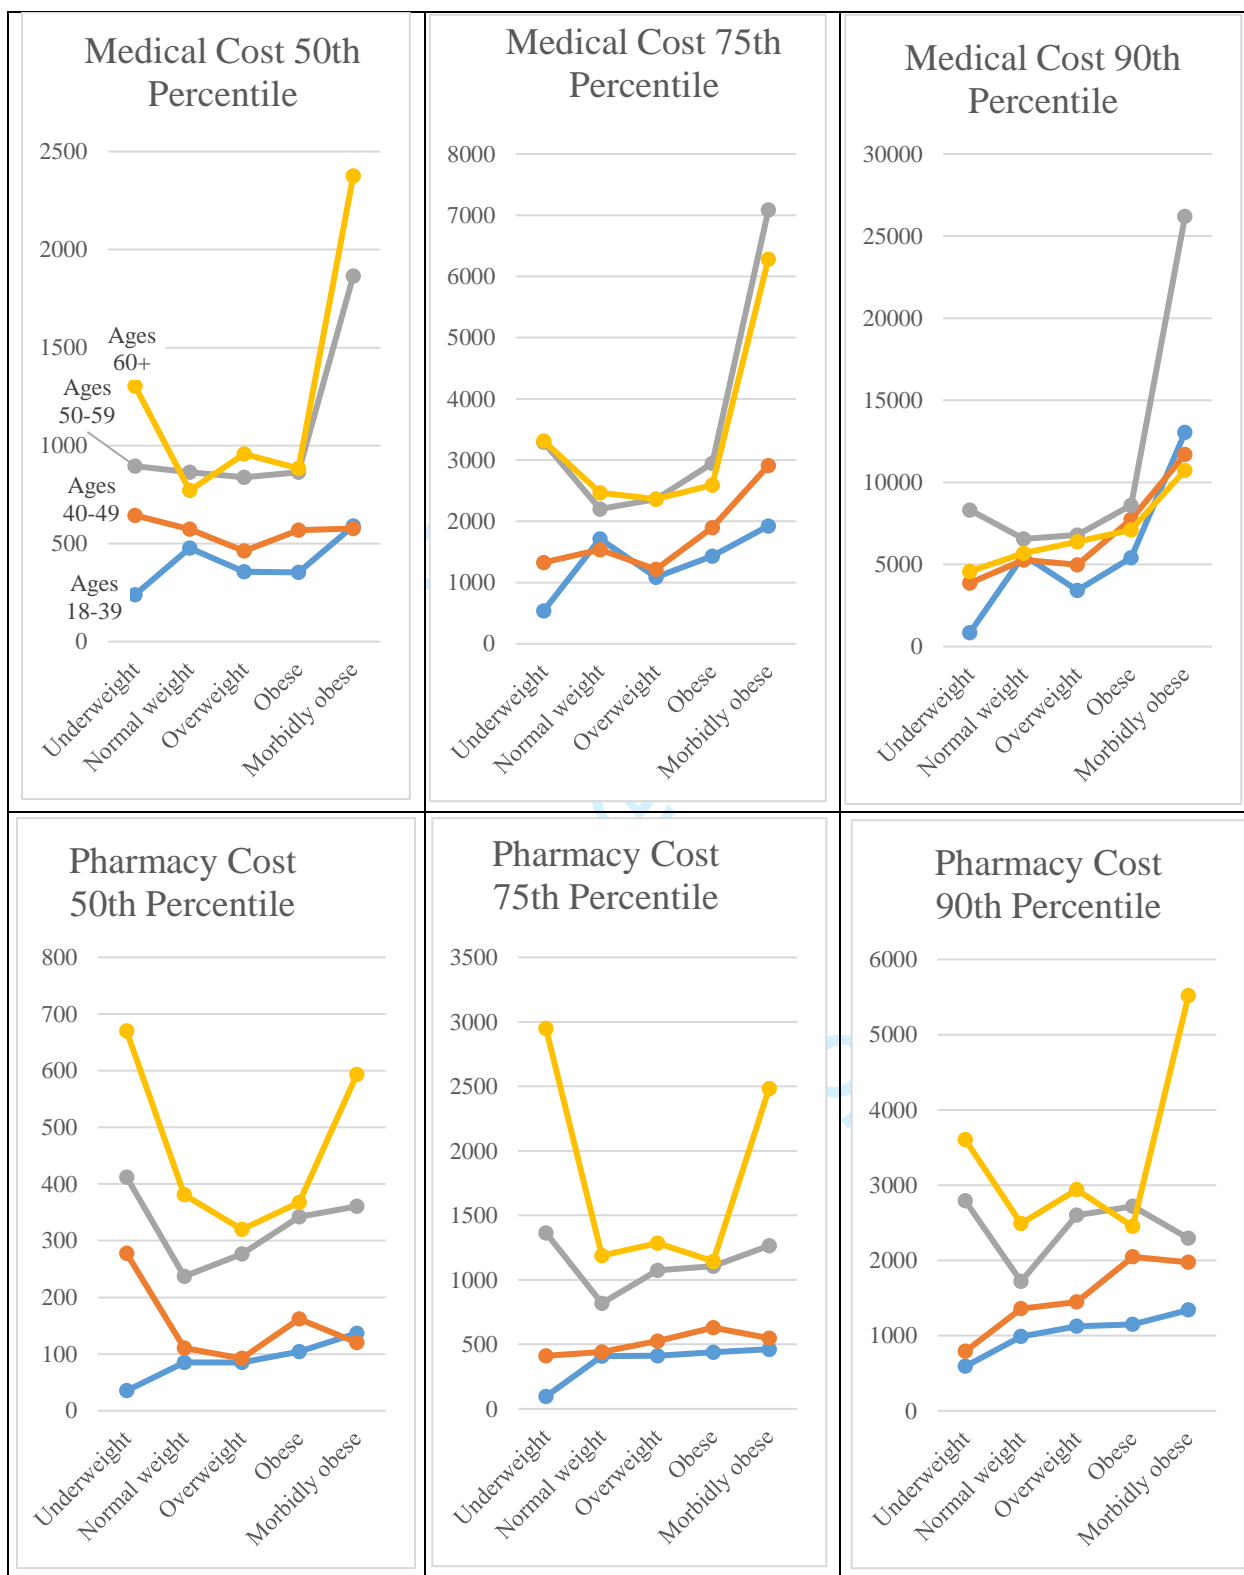

STROBE Statement—Checklist of items that should be included in reports of *cohort studies*

|                           | Item No | Recommendation                                                                                                                                                                                    | Page/line numbers |
|---------------------------|---------|---------------------------------------------------------------------------------------------------------------------------------------------------------------------------------------------------|-------------------|
| <b>Title and abstract</b> | 1       | (a) Indicate the study's design with a commonly used term in the title or the abstract                                                                                                            | 1/6, 2/25         |
|                           |         | (b) Provide in the abstract an informative and balanced summary of what was done and what was found                                                                                               | Done              |
| <b>Introduction</b>       |         |                                                                                                                                                                                                   |                   |
| Background/rationale      | 2       | Explain the scientific background and rationale for the investigation being reported                                                                                                              | Done              |
| Objectives                | 3       | State specific objectives, including any prespecified hypotheses                                                                                                                                  | Done              |
| <b>Methods</b>            |         |                                                                                                                                                                                                   |                   |
| Study design              | 4       | Present key elements of study design early in the paper                                                                                                                                           | Done              |
| Setting                   | 5       | Describe the setting, locations, and relevant dates, including periods of recruitment, exposure, follow-up, and data collection                                                                   | Done              |
| Participants              | 6       | (a) Give the eligibility criteria, and the sources and methods of selection of participants. Describe methods of follow-up                                                                        | Done              |
|                           |         | (b) For matched studies, give matching criteria and number of exposed and unexposed                                                                                                               | NA                |
| Variables                 | 7       | Clearly define all outcomes, exposures, predictors, potential confounders, and effect modifiers. Give diagnostic criteria, if applicable                                                          | Done              |
| Data sources/measurement  | 8*      | For each variable of interest, give sources of data and details of methods of assessment (measurement). Describe comparability of assessment methods if there is more than one group              | Done              |
| Bias                      | 9       | Describe any efforts to address potential sources of bias                                                                                                                                         | Done              |
| Study size                | 10      | Explain how the study size was arrived at                                                                                                                                                         | Done              |
| Quantitative variables    | 11      | Explain how quantitative variables were handled in the analyses. If applicable, describe which groupings were chosen and why                                                                      | Done              |
| Statistical methods       | 12      | (a) Describe all statistical methods, including those used to control for confounding                                                                                                             | Done              |
|                           |         | (b) Describe any methods used to examine subgroups and interactions                                                                                                                               | NA                |
|                           |         | (c) Explain how missing data were addressed                                                                                                                                                       | NA                |
|                           |         | (d) If applicable, explain how loss to follow-up was addressed                                                                                                                                    | NA                |
|                           |         | (e) Describe any sensitivity analyses                                                                                                                                                             | NA                |
| <b>Results</b>            |         |                                                                                                                                                                                                   |                   |
| Participants              | 13*     | (a) Report numbers of individuals at each stage of study—eg numbers potentially eligible, examined for eligibility, confirmed eligible, included in the study, completing follow-up, and analysed | Done              |
|                           |         | (b) Give reasons for non-participation at each stage                                                                                                                                              | NA                |
|                           |         | (c) Consider use of a flow diagram                                                                                                                                                                | NA                |
| Descriptive data          | 14*     | (a) Give characteristics of study participants (eg demographic, clinical, social) and information on exposures and potential confounders                                                          | Done              |
|                           |         | (b) Indicate number of participants with missing data for each variable of interest                                                                                                               | Done              |
|                           |         | (c) Summarise follow-up time (eg, average and total amount)                                                                                                                                       | Done              |
| Outcome data              | 15*     | Report numbers of outcome events or summary measures over time                                                                                                                                    | Done              |
| Main results              | 16      | (a) Give unadjusted estimates and, if applicable, confounder-adjusted estimates and their precision (eg, 95% confidence interval). Make clear                                                     | Done              |

|                          |    |                                                                                                                                                                            |      |
|--------------------------|----|----------------------------------------------------------------------------------------------------------------------------------------------------------------------------|------|
|                          |    | which confounders were adjusted for and why they were included                                                                                                             |      |
|                          |    | (b) Report category boundaries when continuous variables were categorized                                                                                                  | NA   |
|                          |    | (c) If relevant, consider translating estimates of relative risk into absolute risk for a meaningful time period                                                           | NA   |
| Other analyses           | 17 | Report other analyses done—eg analyses of subgroups and interactions, and sensitivity analyses                                                                             | Done |
| <b>Discussion</b>        |    |                                                                                                                                                                            |      |
| Key results              | 18 | Summarise key results with reference to study objectives                                                                                                                   | Done |
| Limitations              | 19 | Discuss limitations of the study, taking into account sources of potential bias or imprecision. Discuss both direction and magnitude of any potential bias                 | Done |
| Interpretation           | 20 | Give a cautious overall interpretation of results considering objectives, limitations, multiplicity of analyses, results from similar studies, and other relevant evidence | Done |
| Generalisability         | 21 | Discuss the generalisability (external validity) of the study results                                                                                                      | Done |
| <b>Other information</b> |    |                                                                                                                                                                            |      |
| Funding                  | 22 | Give the source of funding and the role of the funders for the present study and, if applicable, for the original study on which the present article is based              | Done |

\*Give information separately for exposed and unexposed groups.

**Note:** An Explanation and Elaboration article discusses each checklist item and gives methodological background and published examples of transparent reporting. The STROBE checklist is best used in conjunction with this article (freely available on the Web sites of PLoS Medicine at <http://www.plosmedicine.org/>, Annals of Internal Medicine at <http://www.annals.org/>, and Epidemiology at <http://www.epidem.com/>). Information on the STROBE Initiative is available at <http://www.strobe-statement.org>.
